# Supplementary material for: Nonpharmacological Interventions for Pediatric Migraine: A Network Meta-analysis
Source: Oxford University Press journal article supplement (doi:10.1542/peds.2019-4107), 2021-03-09
Supplement: peds_20194107supplementarydata.doc [file peds_20194107supplementarydata.doc]

**SUPPLEMENTARY MATERIALS**

**Table of Contents**

**eAppendix 1.** Search Terms

eAppendix 2. Methodological considerations

**eAppendix 3.** Broad classification of nodes in the network

**eAppendix 4.** GRADE Ratings for each network

**eAppendix 5.** Details on Inconsistency

**eAppendix 6.** Details on Publication Bias

**eAppendix 7.** Details on Prediction Intervals

**eAppendix 8.** PRISMA Checklist

**eFigure 1.** Flow Chart

**eFigure 2.** Funnel plot with accompanying Egger test: Short-term efficacy

**eFigure 3.** Funnel plot with accompanying Egger test: Long-term efficacy

**eTable 1.** Study characteristics

**eTable 2.** Raw data of included studies

**eTable 3A.** Head-to-head comparisons of short-term efficacy: Lumping approach

**eTable 3B.** Head-to-head comparisons of long-term efficacy: Lumping approach

**eTable 3C.** Head-to-head comparisons of short-term efficacy: Splitting approach

**eTable 3D.** Head-to-head comparisons of long-term efficacy: Splitting approach

**eReferences.**

**eAppendix 1. Search Terms**

Medline Search Strategy (Adapted for other databases)

| [# ▲](http://ovidsp.tx.ovid.com.emedien.ub.uni-muenchen.de/sp-3.30.0b/ovidweb.cgi?&S=LICLFPCNEPDDFMNJNCEKDAFBPFJLAA00&Sort+Sets=descending) | **Searches** |
| --- | --- |
| 1 | randomi* controlled trial.pt. |
| 2 | placebo.ab. |
| 3 | drug therapy.fs. |
| 4 | random*.ab. |
| 5 | trial.ab. |
| 6 | groups.ab. |
| 7 | 1 or 2 or 3 or 4 or 5 or 6 |
| 8 | exp animals/ not humans.sh. |
| 9 | 7 not 8 |
| 10 | exp migraine disorders/dh, dt, pc, su, th |
| 11 | migrain*.mp. |
| 12 | vascular headaches/dt, pc, su, th |
| 13 | (vascular adj3 headache*).mp. |
| 14 | 10 or 11 or 12 or 13 |
| 15 | exp adolescent/ or exp child/ or exp infant/ |
| 16 | (child* or adolescen* or infant* or juvenile* or pediatric* or paediatric* or developmental age).mp. |
| 17 | 15 or 16 |
| 18 | 9 and 14 and 17 |

**eAppendix 2. Methodological considerations**

Network meta-analysis was considered the most appropriate method for our research question because several competing interventions are available for pediatric migraine and a comparison of these interventions enables the estimation of their relative ranking for a chosen outcome.1 The simultaneous analysis of direct and indirect evidence allows to assess the relative effectiveness and safety of several interventions and synthesize evidence across a network of randomized controlled trials.2 This supports all patients and health care-providers who have to decide between competing interventions.

The formation of the nodes is a central process that requires both, statistical and clinical considerations. Non-pharmacological interventions are usually complex, involving several components and each component might affect the success of the intervention. One major issue when conducting a network meta-analysis is the decision of whether different interventions are homogenous enough to build a separate entity (i.e., node). This process, called ‘lumping’, has been shown to feature limitations for further interpreting results.3 ‘Splitting’ (i.e., building more fine-grained and detailed nodes), on the other hand, leads to larger networks and lower power. For clinical decision making, splitting might be more useful because it represents actual treatment modalities. Decisions about whether or not to group similar treatments in a node should be therefore guided by a clinical consensus regarding their similarity and the research question at hand.4

**eAppendix 3. Broad classification of nodes**

In order to ensure the clinical interpretability of the data, we decided to cluster the non-pharmacological interventions into broader classes. The classes were clustered in the following way:

- ‘Biofeedback’ node:
  - Biofeedback
  - Biofeedback stress management
  - Biofeedback relaxation education
  - Autogenic feedback
- ‘Relaxation’ node:
  - Relaxation
  - Progressive muscle relaxation
  - Transcendental meditation
  - Hypnotherapy
  - Relaxation education
  - Autogenic training
  - Relaxation stress management
- ‘Psychological treatment’ node:
  - Psychological treatment
- ‘Education’ node:
  - Education

**eAppendix 4. GRADE Ratings for each network**

Using the Grading of Recommendations Assessment, Development, and Evaluation ratings (GRADE) 5 as well as the recently developed web application to apply this framework 6, we examined the certainty of evidence for the network estimate in line with the following criteria:

**Study limitations (Within study bias)**: We classified the overall risk of bias of each study. In line with the Cochrane Risk of Bias tool 7, we rated five risk of bias items (i.e., allocation sequence concealment, adequate blinding, incomplete outcome data, selective outcome reporting, and other potential threats to validity). The average risk of bias was calculated by building the mean of all risk of bias items. For example: a study has been judged as *medium* risk of bias [some concerns] when the individual items would be once *high risk* [major concerns], three times *low risk* [no concerns], and twice *medium OR unclear risk* [some concerns]. Afterwards, we used the contribution matrix to calculate the percentage of contribution from each study, and finally assessed the study limitation for each network estimate based on the weighted average risk of bias of the contributing studies. We used the rule “Average Risk of Bias” in order to calculate the within study bias.

**Publication bias (Across studies bias):** Since there is so far a lack of a concrete methodology of assessing across-studies bias (publication bias) in NMA, a comparison-adjusted funnel plot with accompanying Egger test for asymmetry was calculated.

**Indirectness:** We judged that there was no concern in this domain as the included studies matched our inclusion criteria and study aims.

**Imprecision:** In line with previous analyses 8, we defined that a clinically meaningful threshold for standardized mean difference (SMD) is 0.20 (i.e., relative effect estimates below -0.20 and above 0.20 are considered clinically important).

**Heterogeneity**: We calculated the degree of concerns through comparing the clinical inference based on the 95% confidence intervals (CI) and that based on the 95% prediction interval (PI), the latter reflecting the degree of heterogeneity. Appling the same clinical inference framework as for imprecision, we rated no concerns in heterogeneity when the two judgements matched (e.g. no concern based on 95% CI and no concern based on 95% PI), some concerns when they differed by one degree (e.g. no concern based on 95% CI but some concerns based on 95% PI), and major concerns when they differed by two degrees (e.g. no concern based on 95% CI but major concerns based on 95% PI).

**Incoherence (Inconsistency)**: For inconsistency, we looked at the results of side splitting and we rated major concerns when p<0.05 but no concern otherwise. When inconsistency measures were not applicable (i.e., no indirect standardized mean difference but only direct standardized mean difference), this was rated as major concerns.

**Short-term efficacy**

In the short-term analysis,we found some concerns for *within-study bias* (i.e., study limitations) for several pair-wise comparisons. In terms of the *across-study bias* (i.e., publication bias), the Egger test for funnel plot asymmetry was non-significant (p=0.24) indicating that selection bias is not a big threat to the network meta-analysis. There was no concern for *indirectness*, since the included studies all matched our study questions and aims. Evaluating *imprecision*, we found that none of the comparisons revealed a clinically significant effect size. Furthermore, we evaluated *heterogeneity*, which is represented by the 95% prediction interval for each individual comparison. For all comparisons, the confidence and prediction intervals agreed in relation to clinically important effect. Furthermore, we found evidence for substantial and statistically significant heterogeneity between designs in the network (between design Q=22.24, p<.001, tau2=0.91; I2=86.5%). Finally, there was no evidence of *inconsistency* between the direct and indirect evidence, i.e., all p-values were above 5%. For some comparisons, however, no inconsistency measure was applicable because there was no indirect standardized mean difference. Those are presented as ‘major concerns’.

**
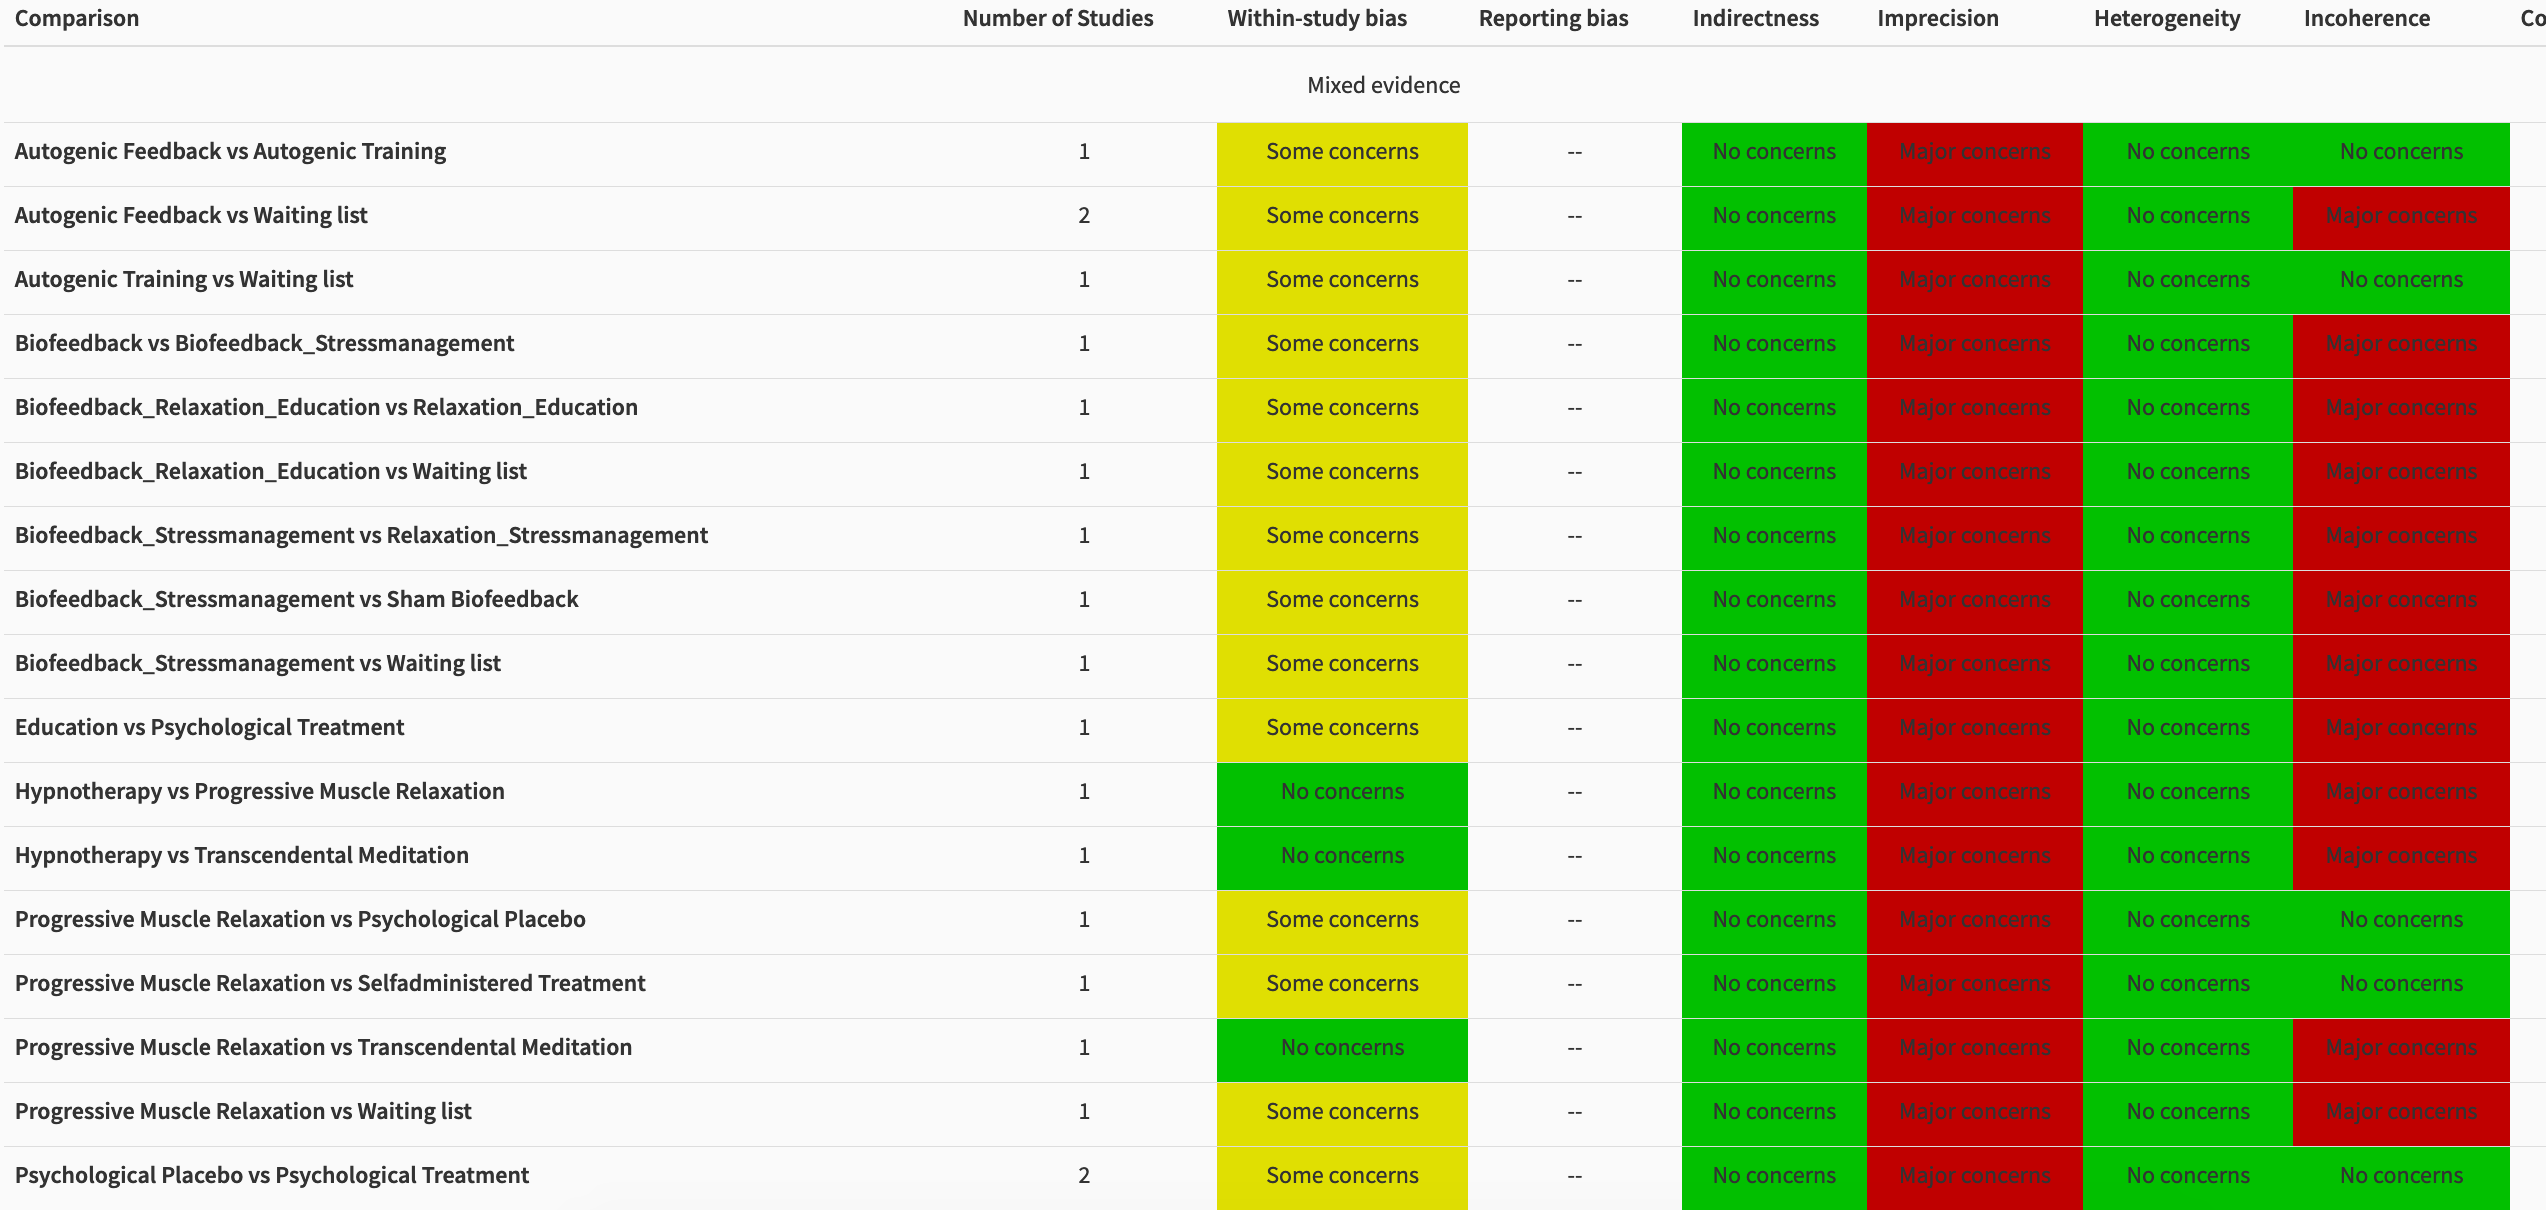
**

**
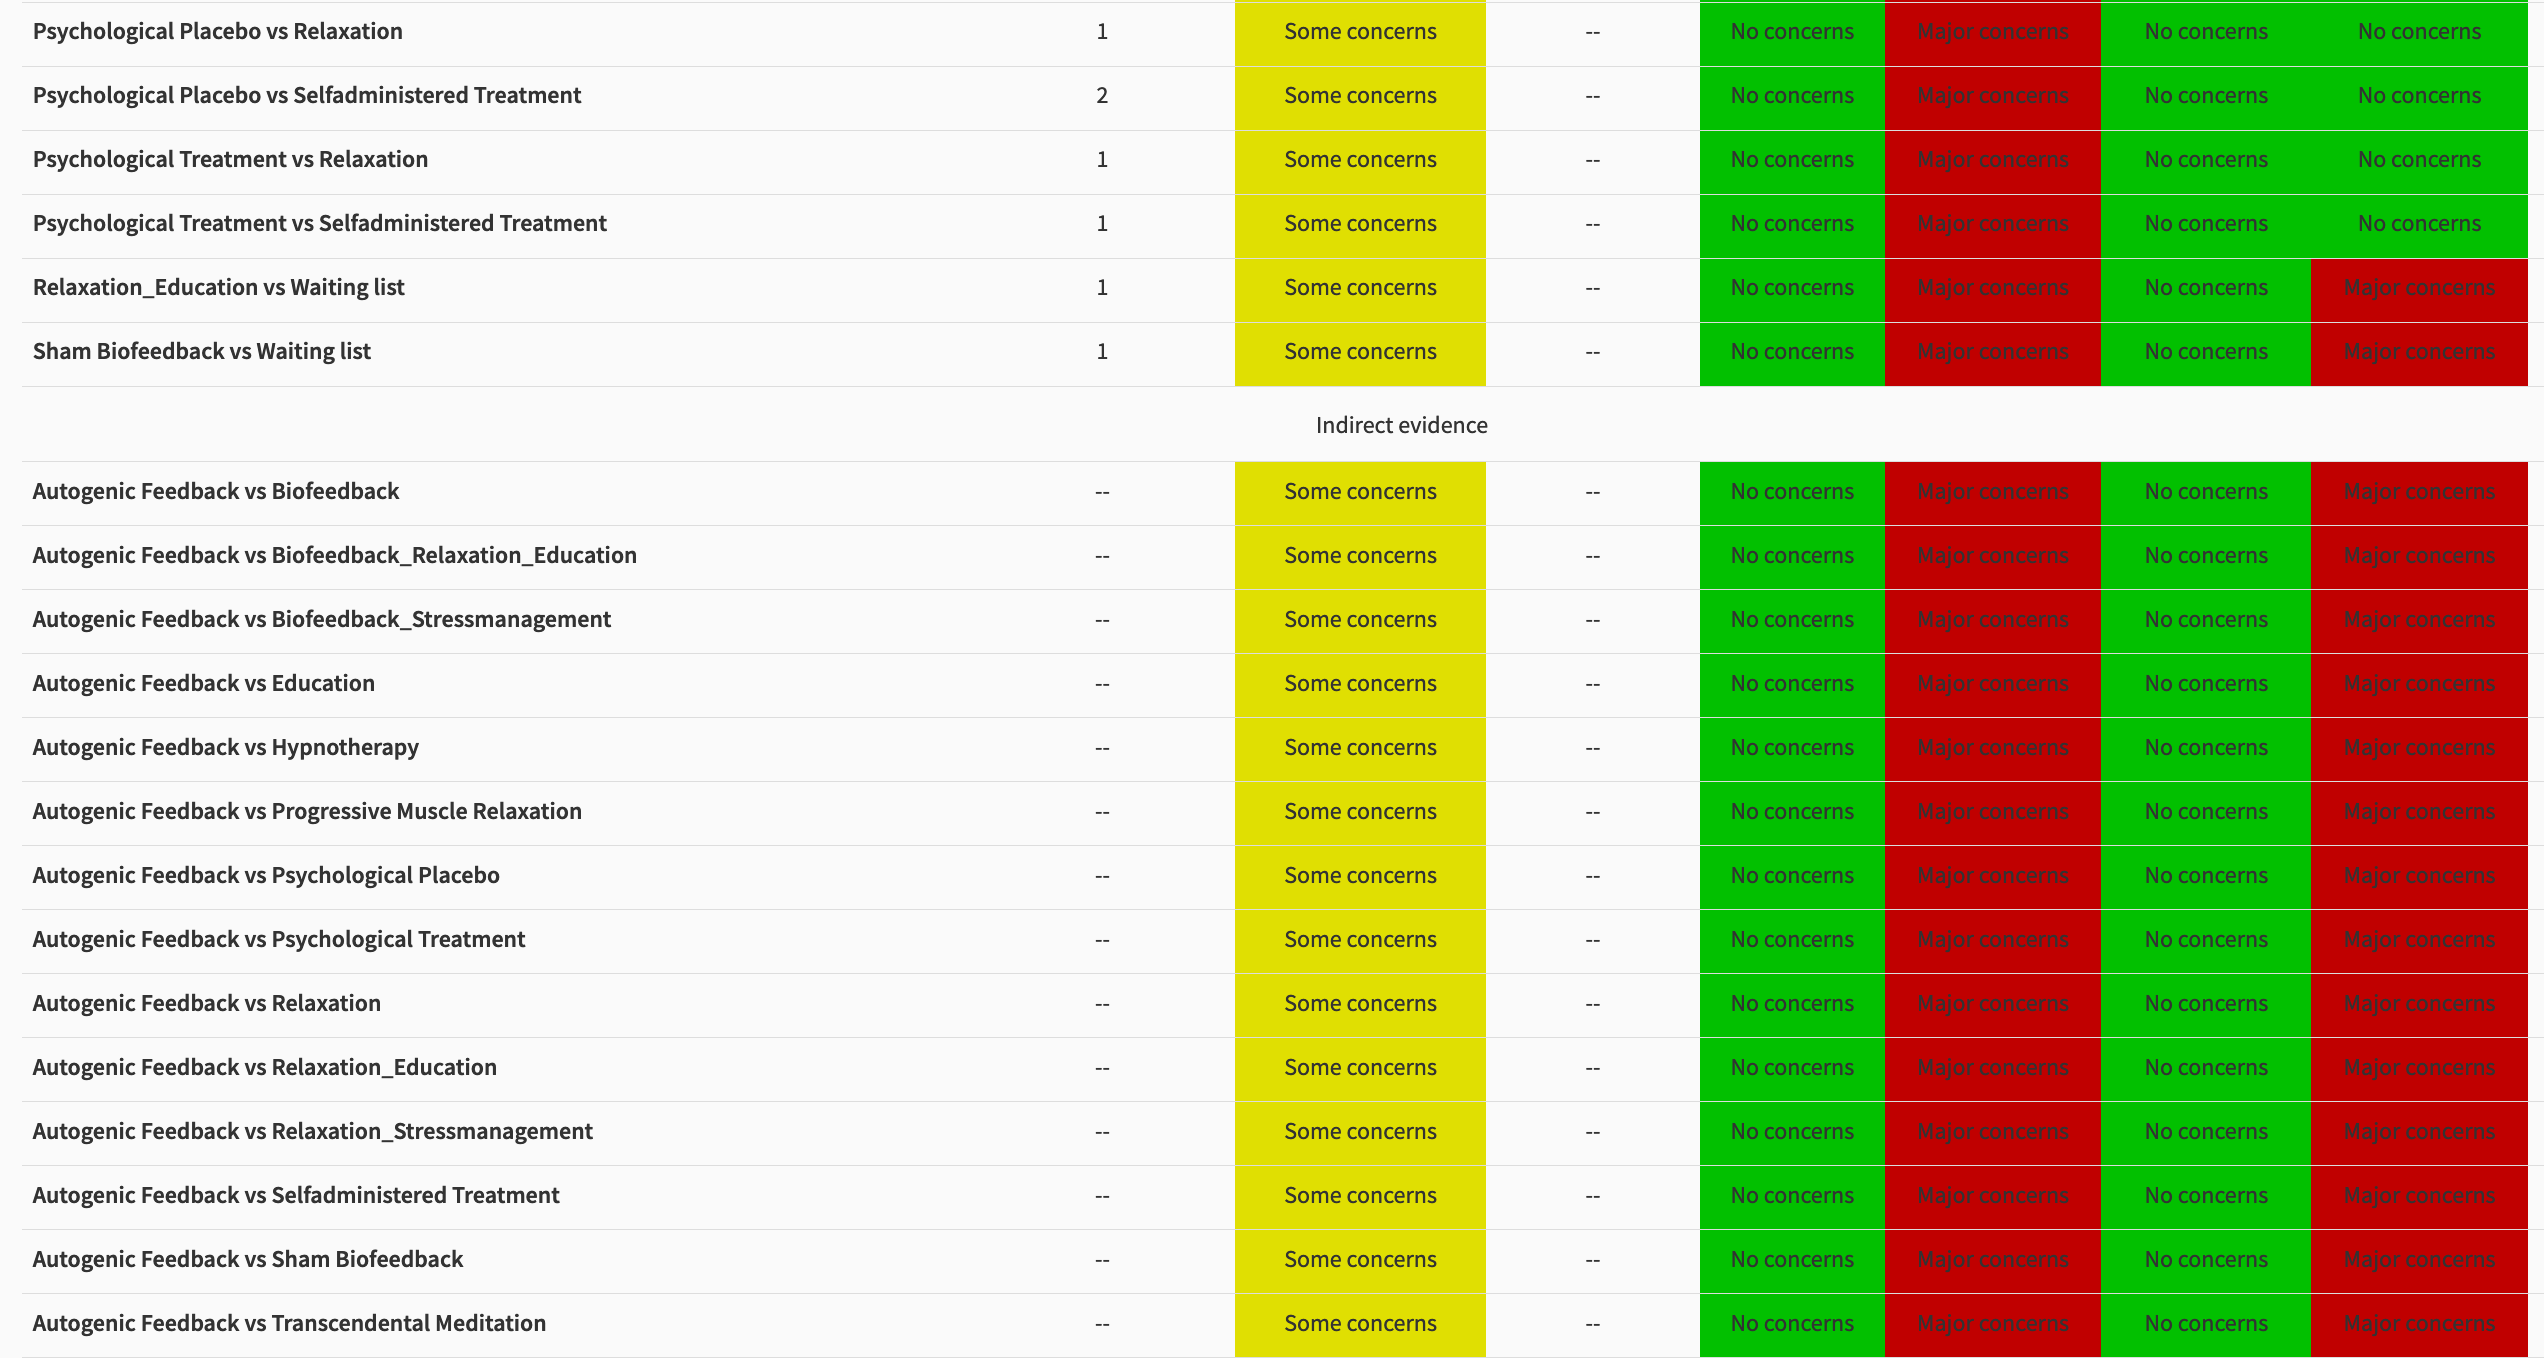
**

**
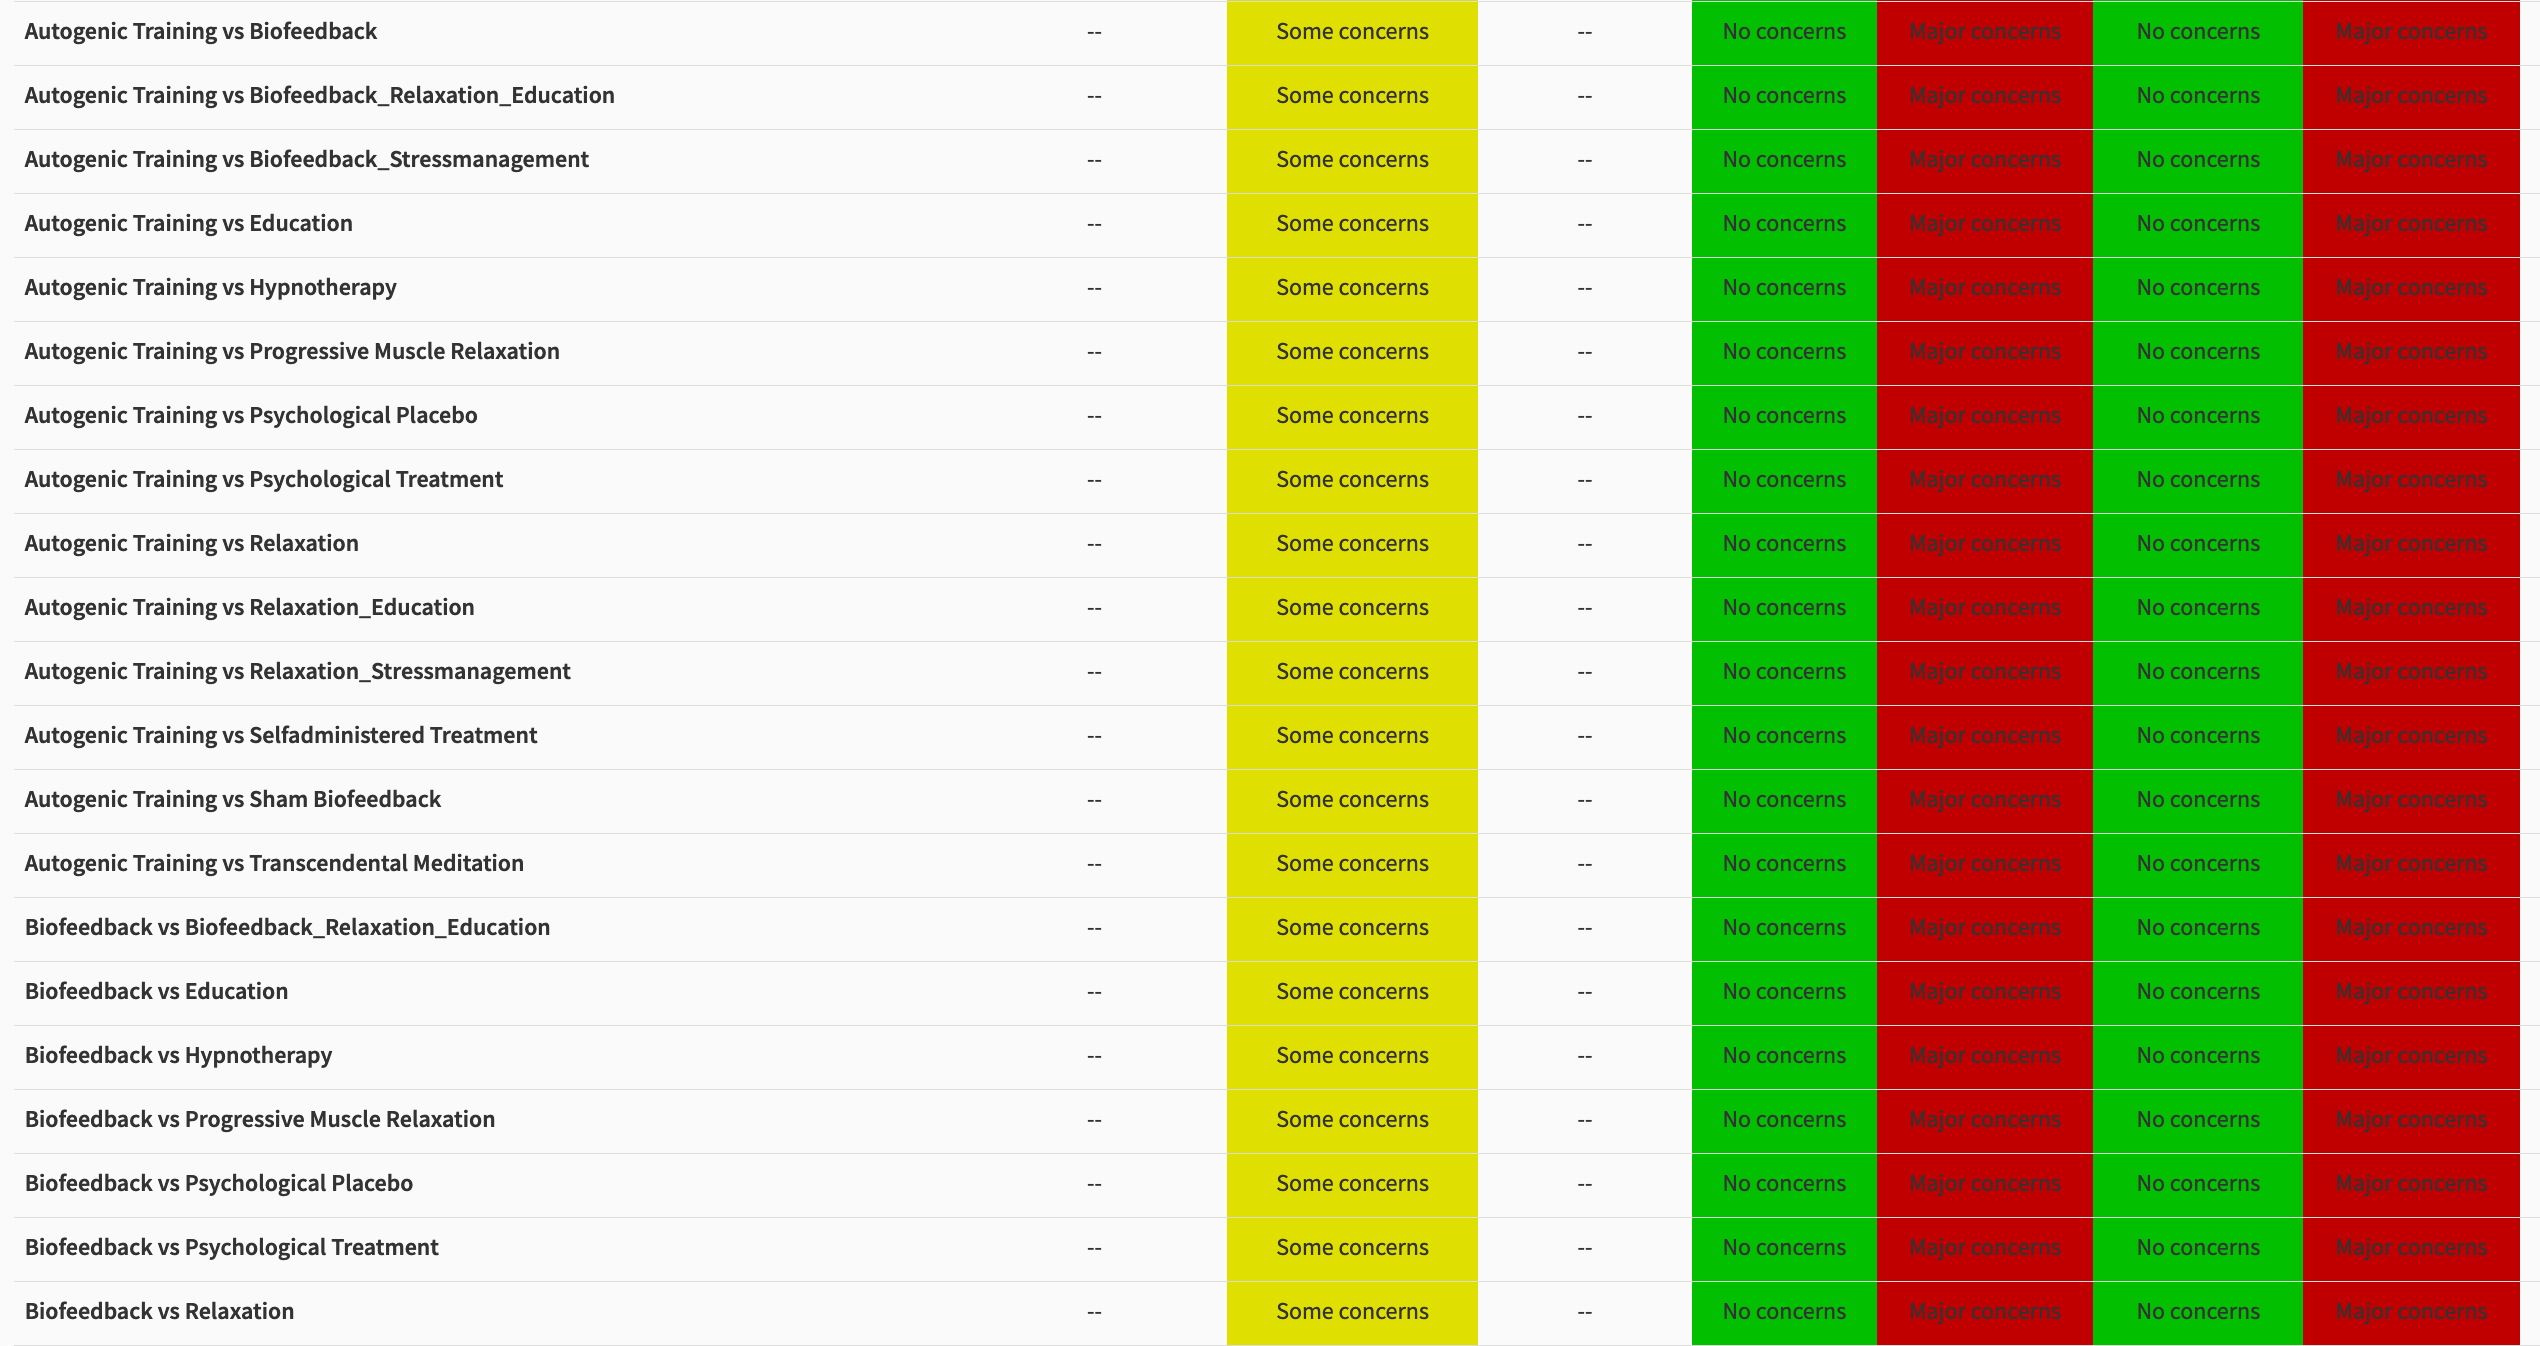
**

**
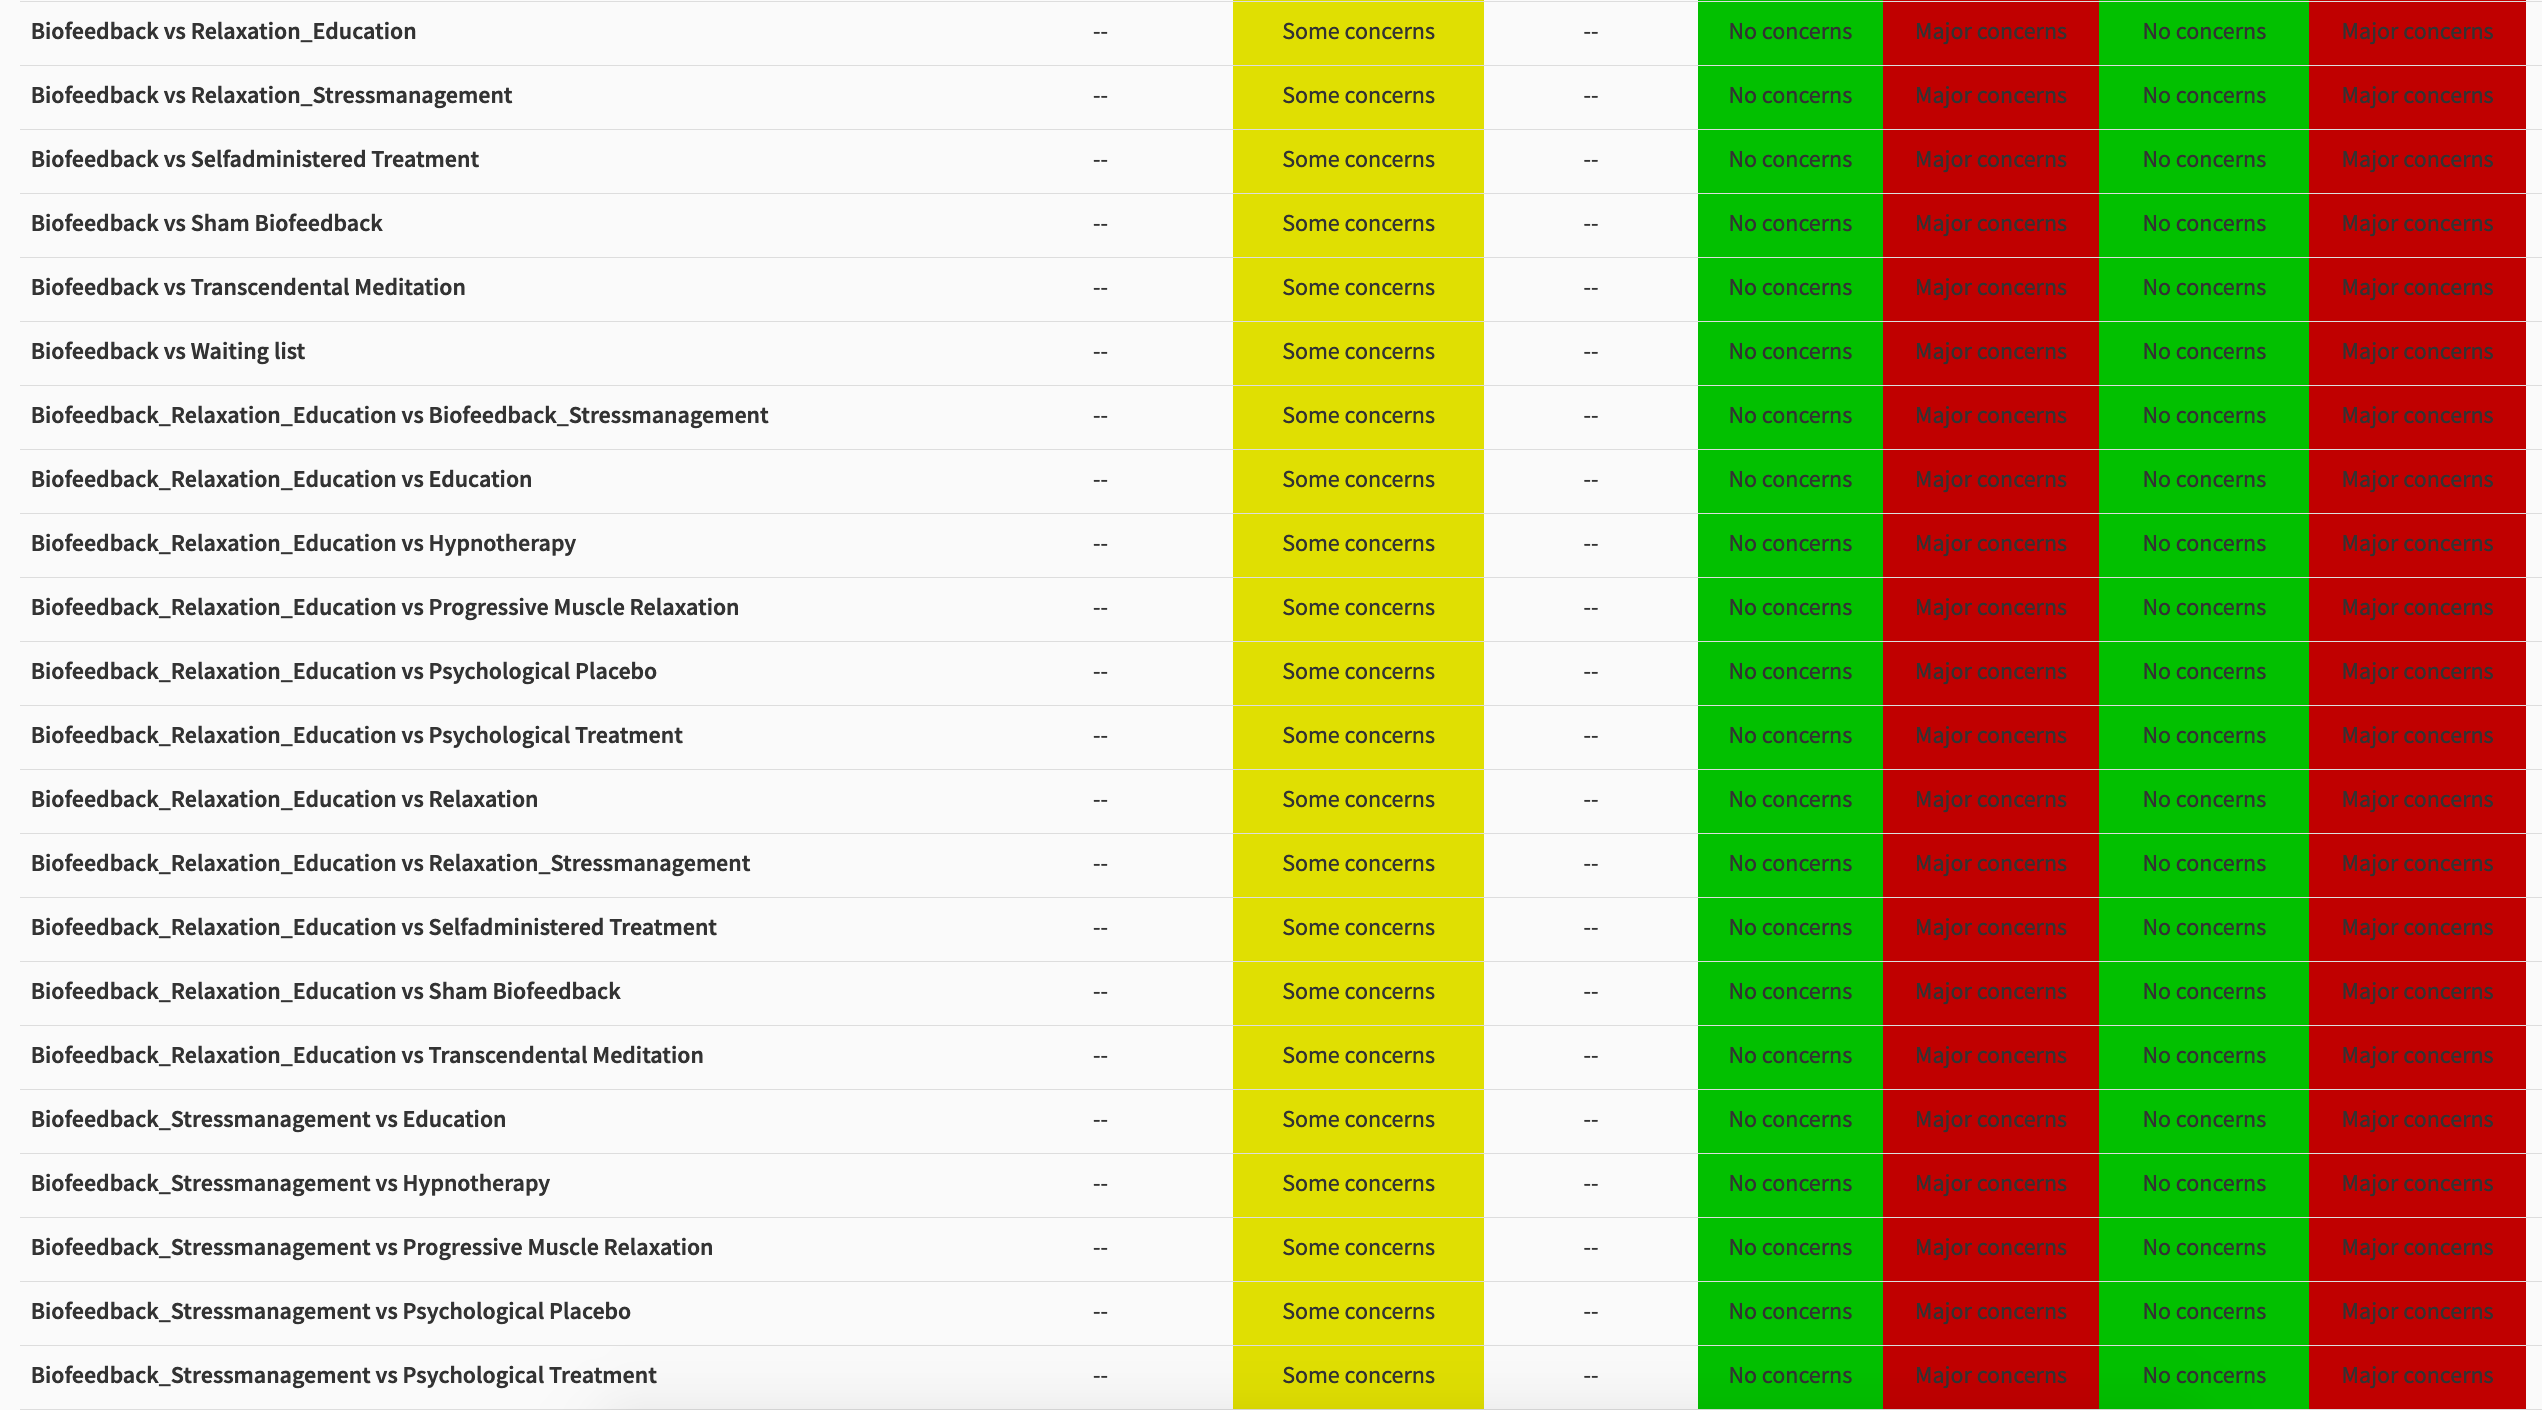
**

**
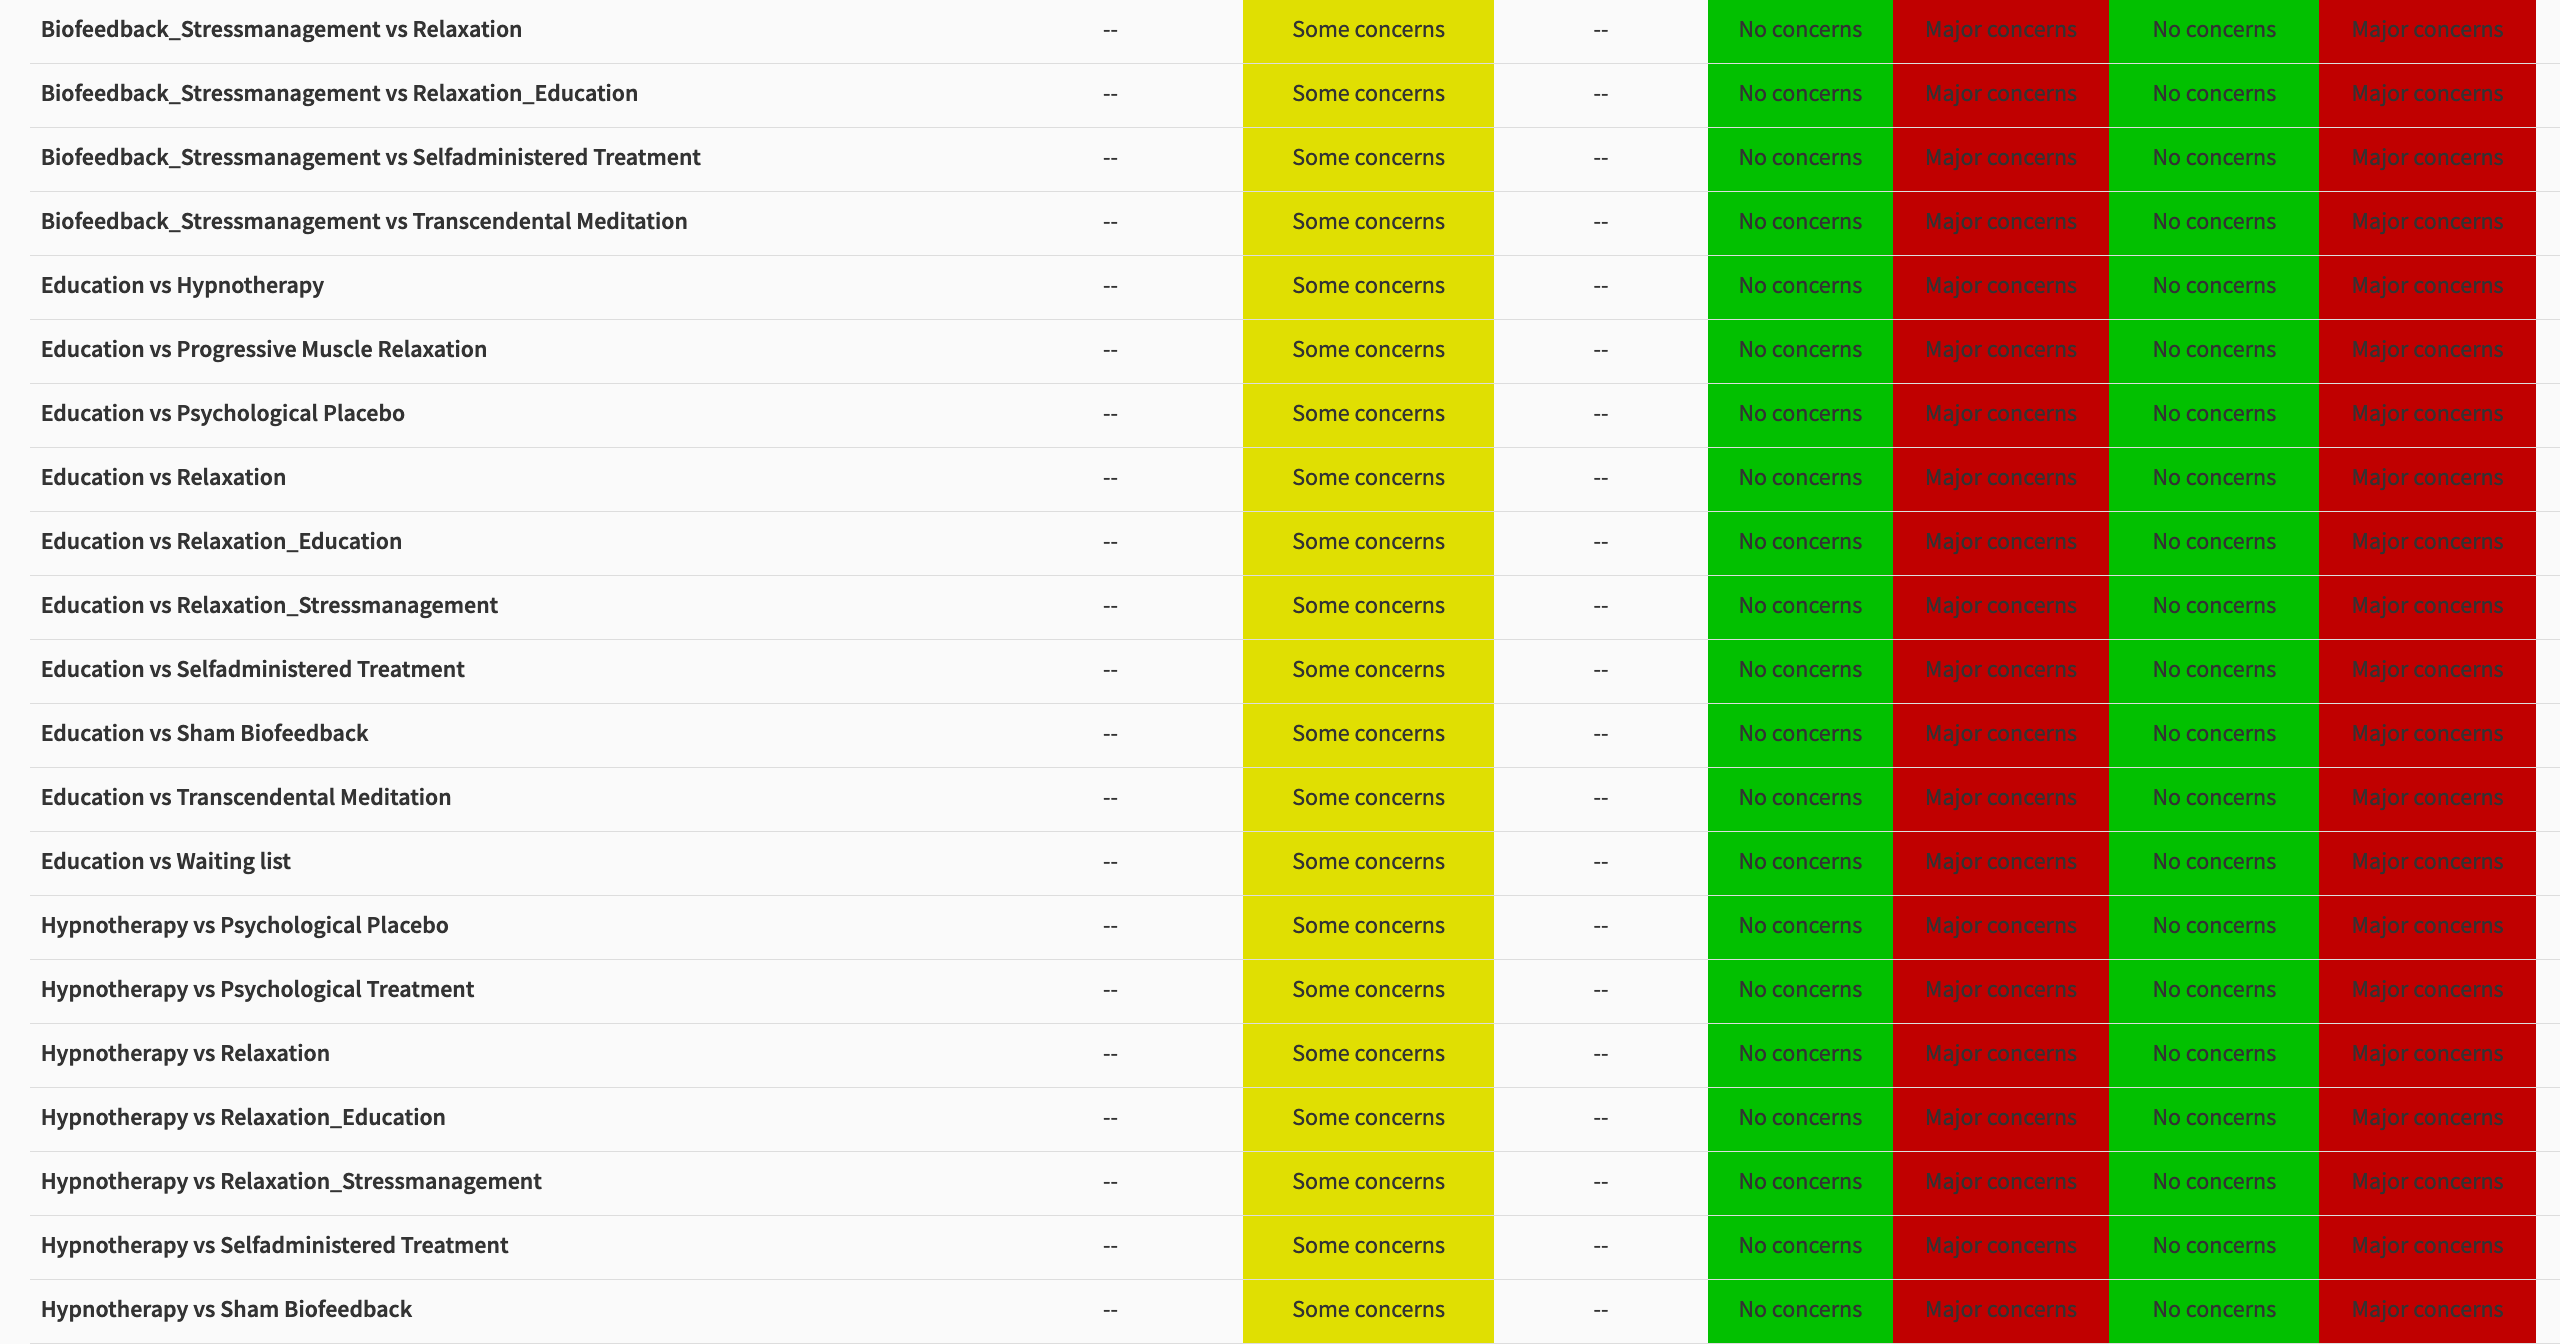
**

**
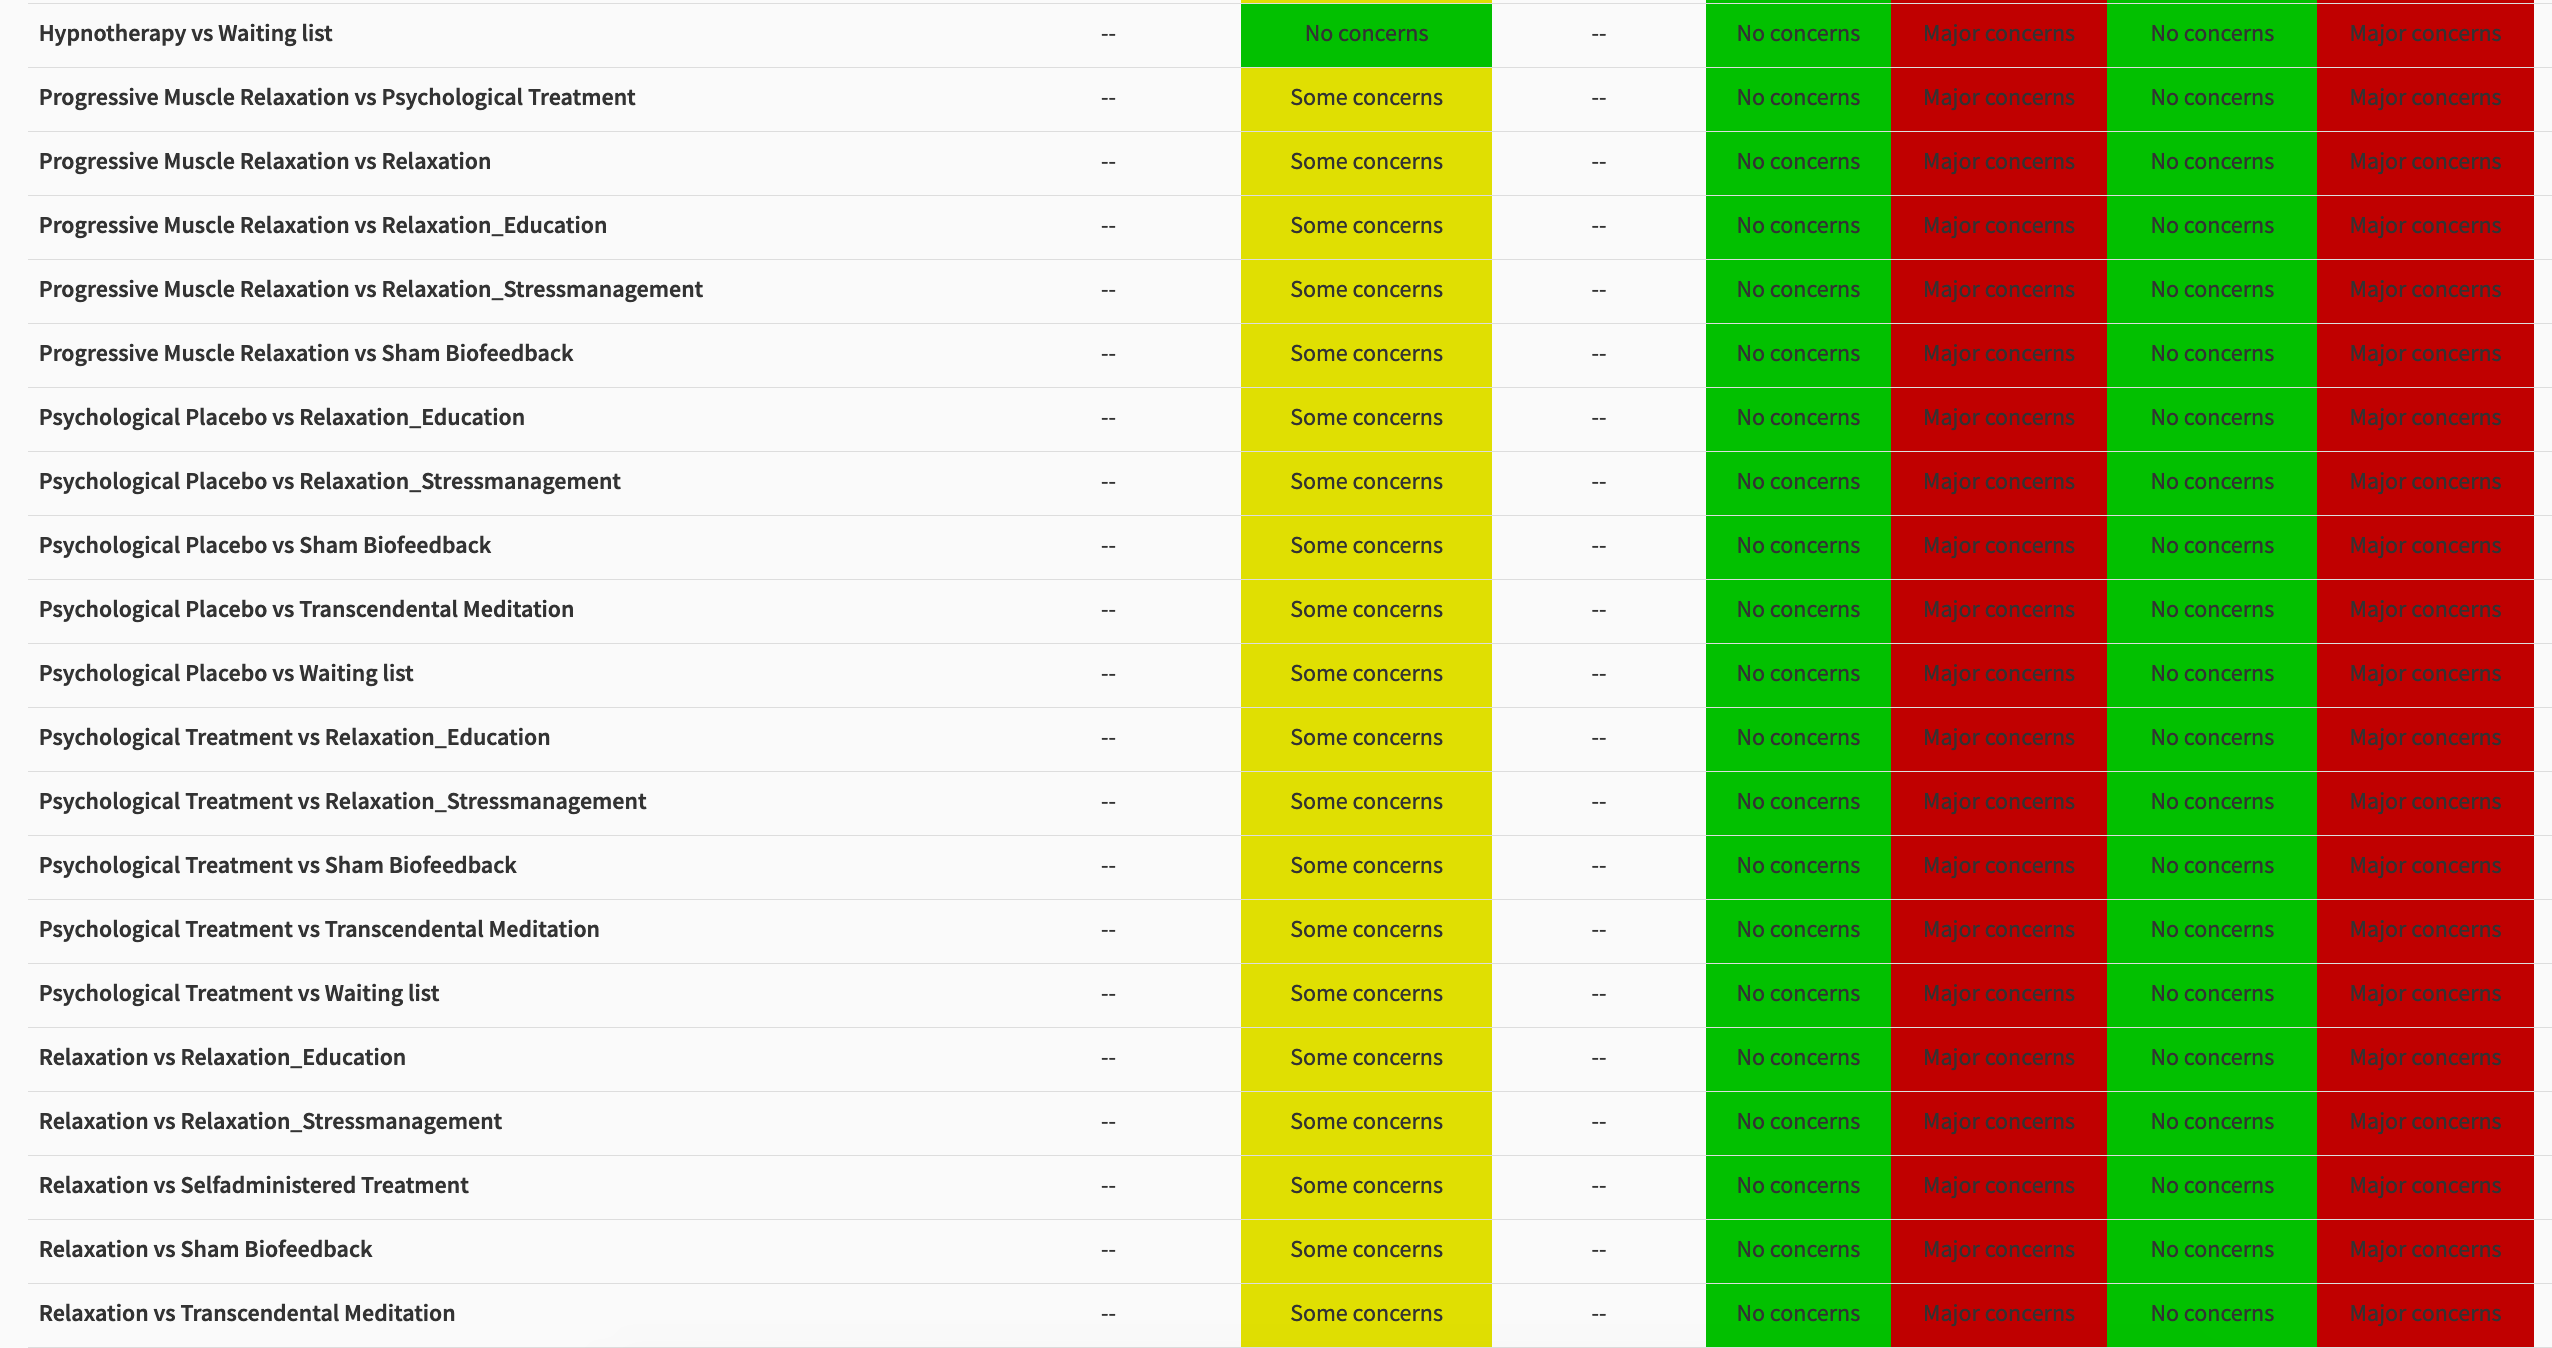
**

**
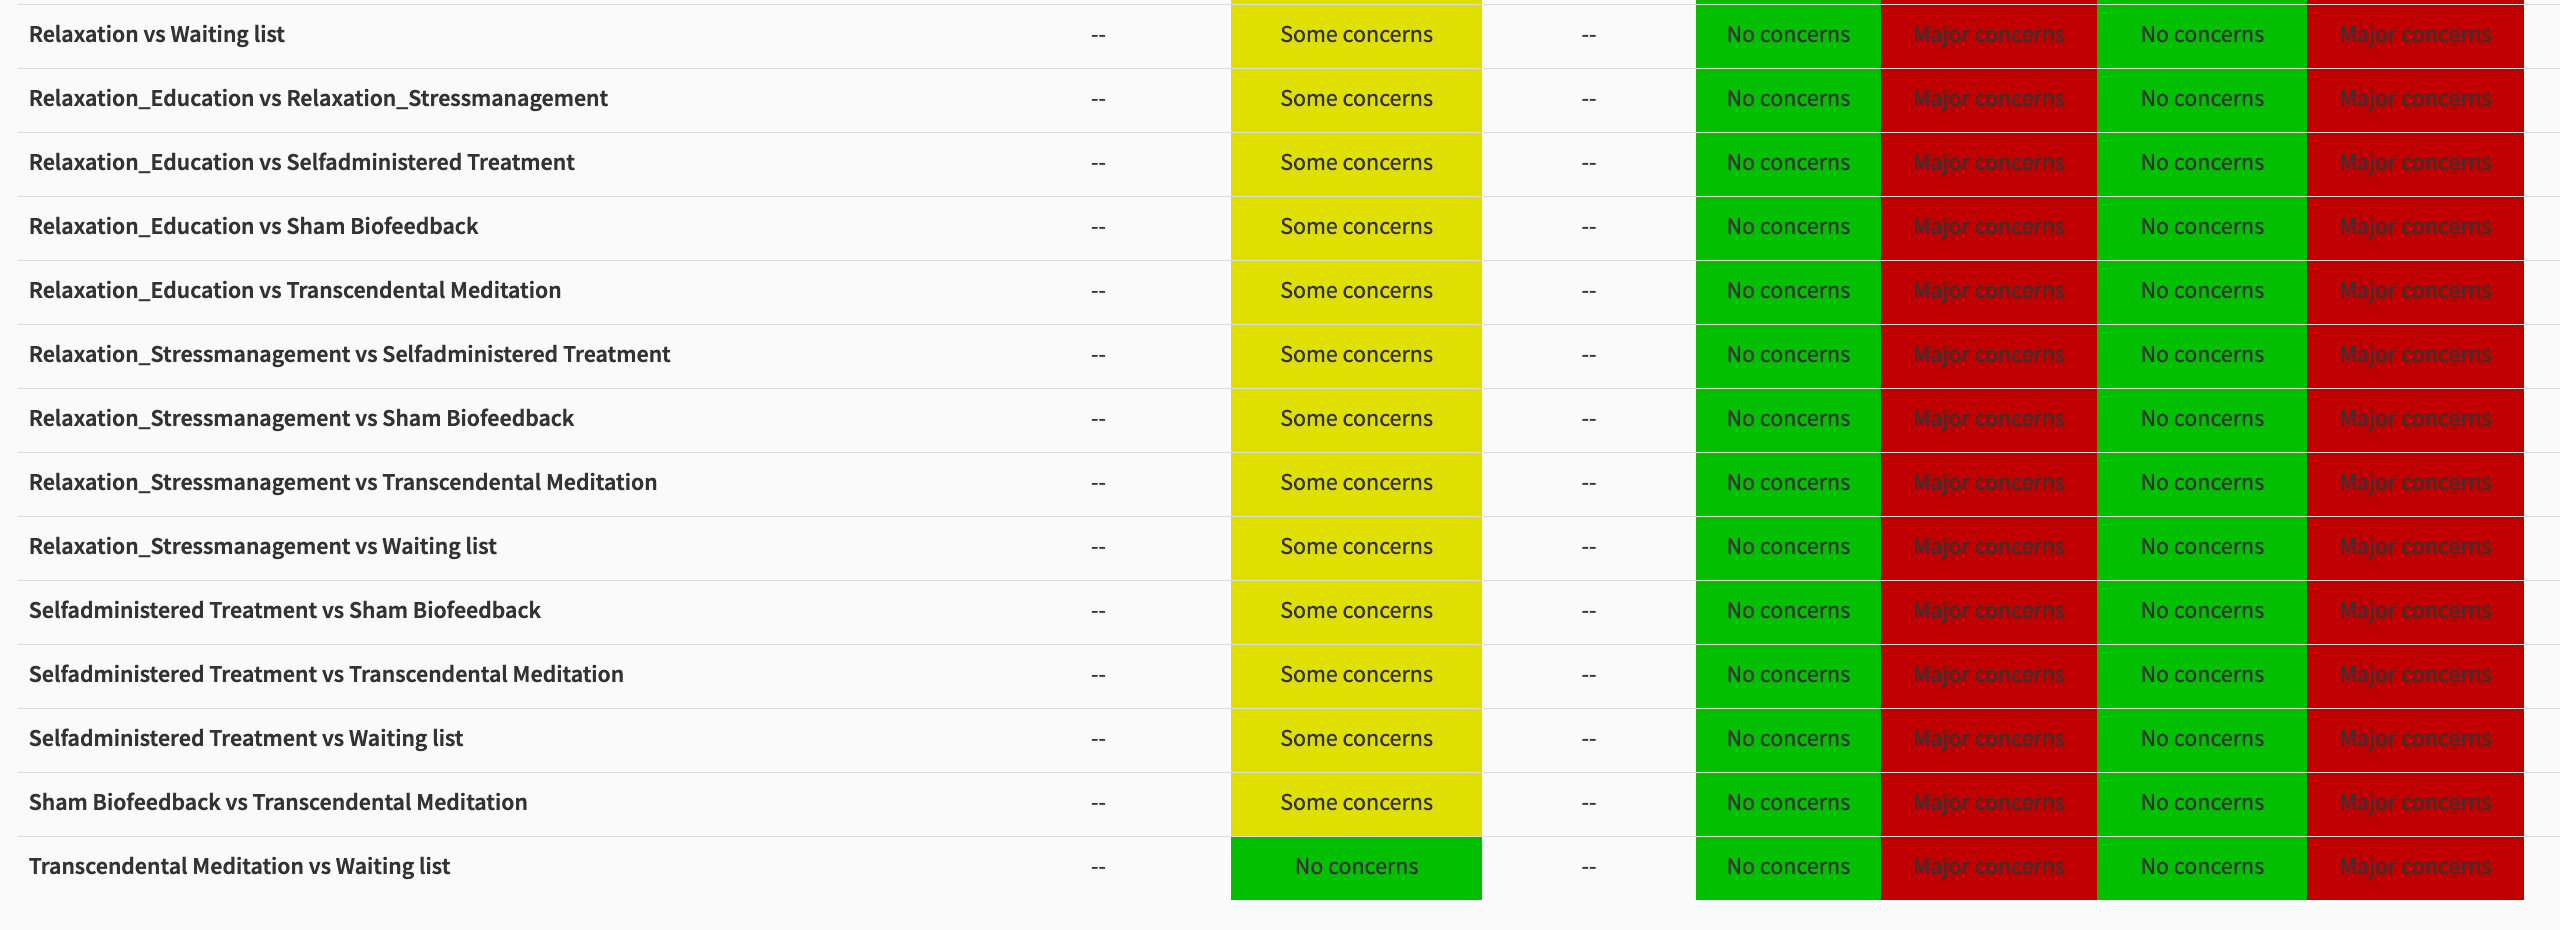
**

**Long-term efficacy**

In the long-term analysis,we found some concerns for *within-study bias* (i.e., study limitations) for several pair-wise comparisons. In terms of the *across-study bias* (i.e., publication bias), the Egger test for funnel plot asymmetry was non-significant (p=0.23) indicating that selection bias is not a big threat to the network meta-analysis. There was no concern for *indirectness*, since the included studies all matched our study questions and aims. Evaluating *imprecision*, we found that none of the comparisons revealed a clinically significant effect size. Furthermore, we evaluated *heterogeneity*, which is represented by the 95% prediction interval for each individual comparison. For all comparisons, the confidence and prediction intervals agreed in relation to clinically important effect. Furthermore, we found evidence for substantial and statistically significant heterogeneity between designs in the network (between design Q=14.6, p=.002, tau2=0.53; I2=79.5%). Finally, there was no evidence of *inconsistency* between the direct and indirect evidences, i.e., all p-values were above 5%. For some comparisons, however, no inconsistency measure was applicable because there was no indirect standardized mean difference. Those are presented as ‘major concerns’.

**
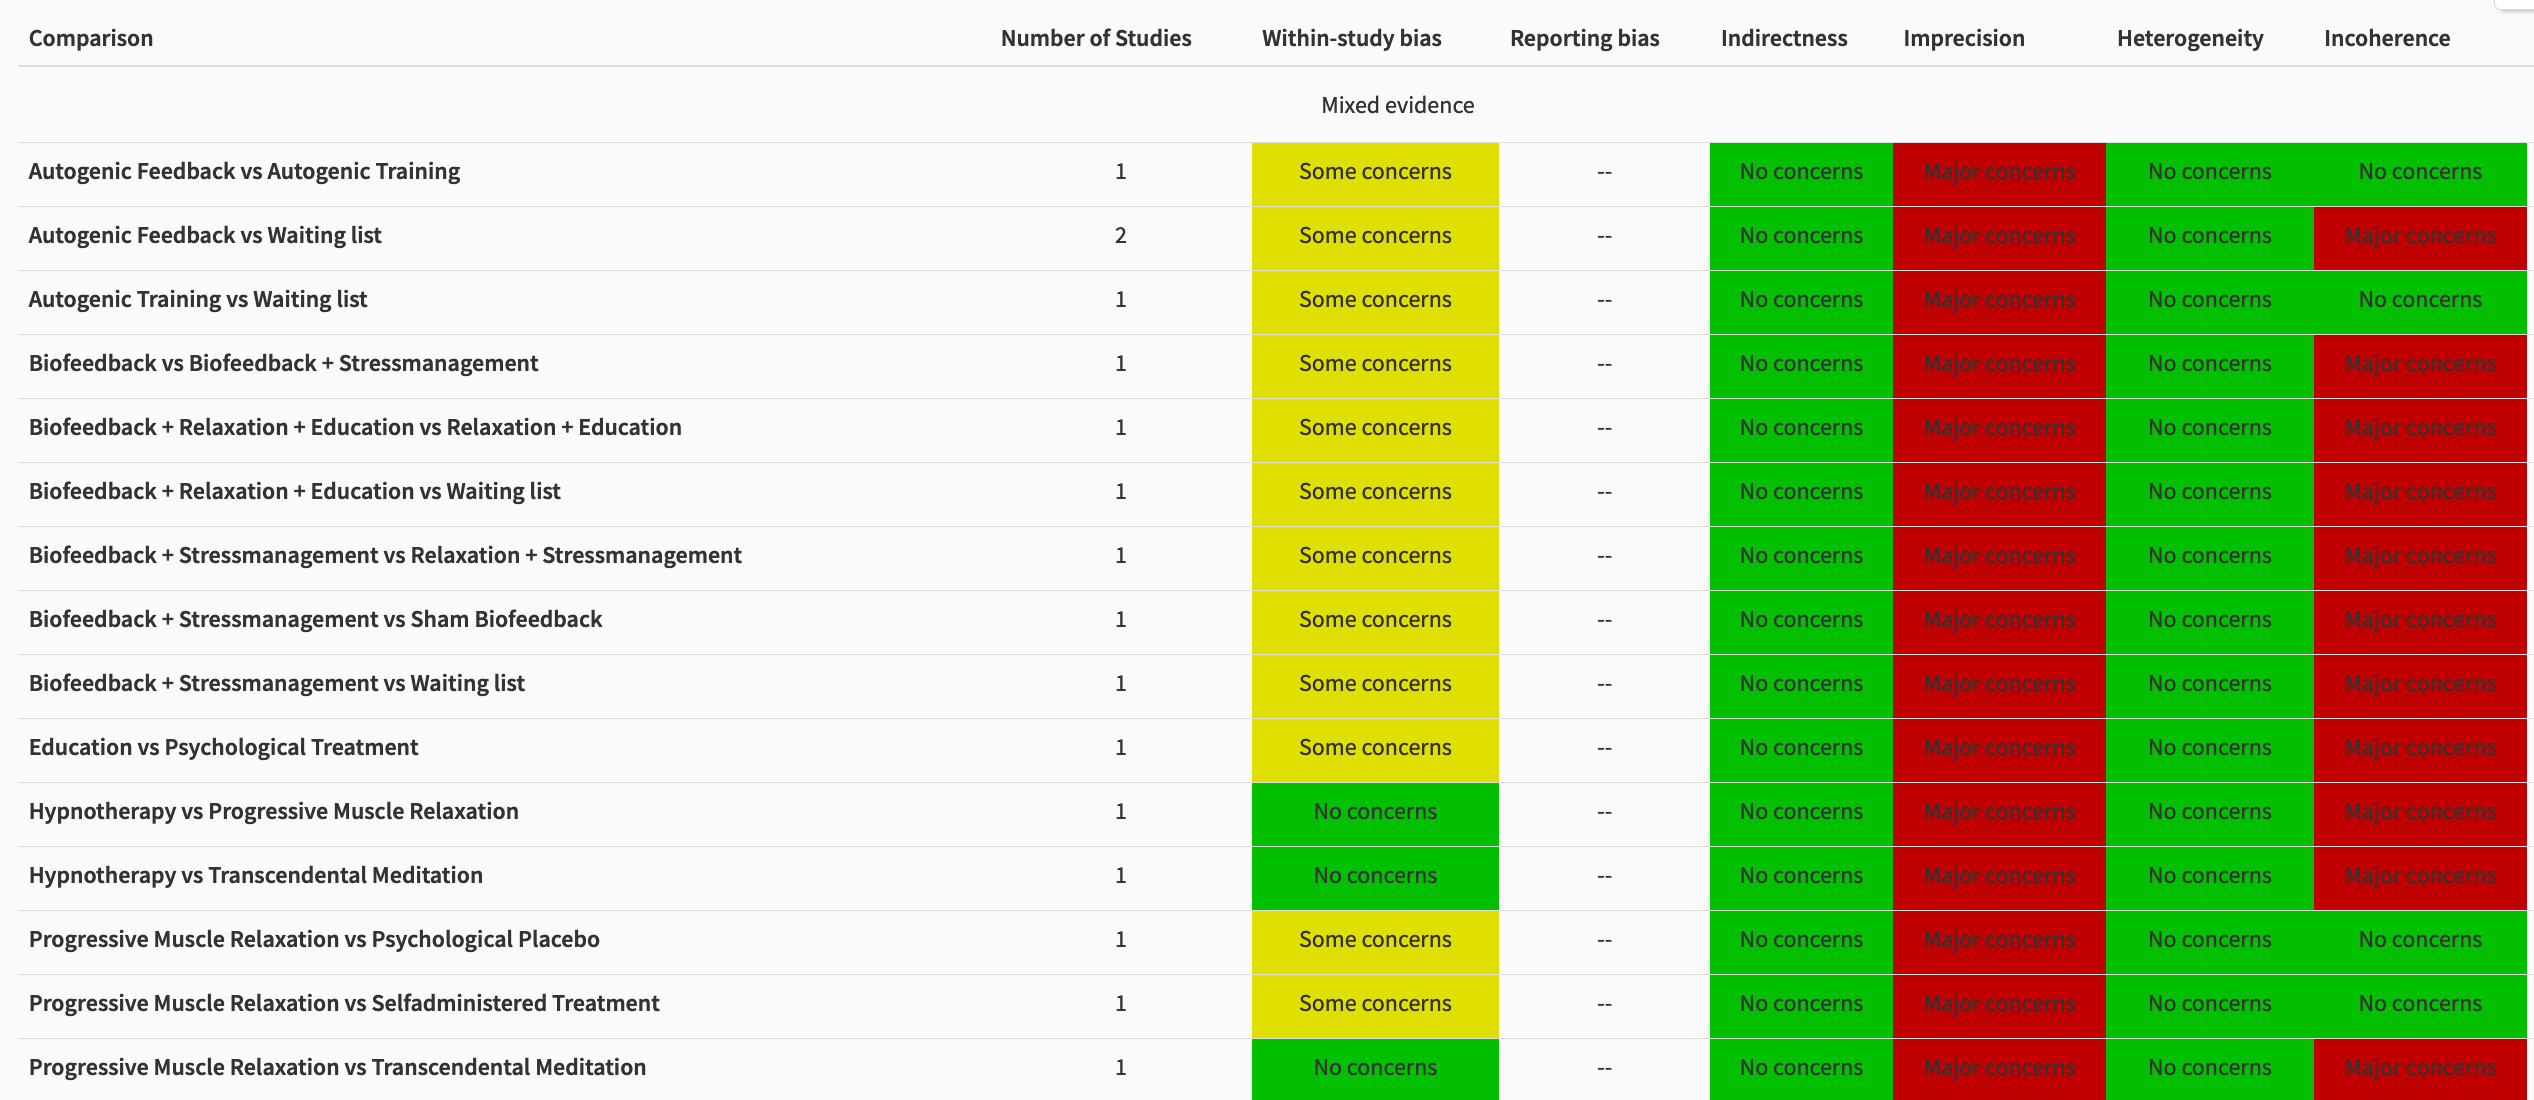

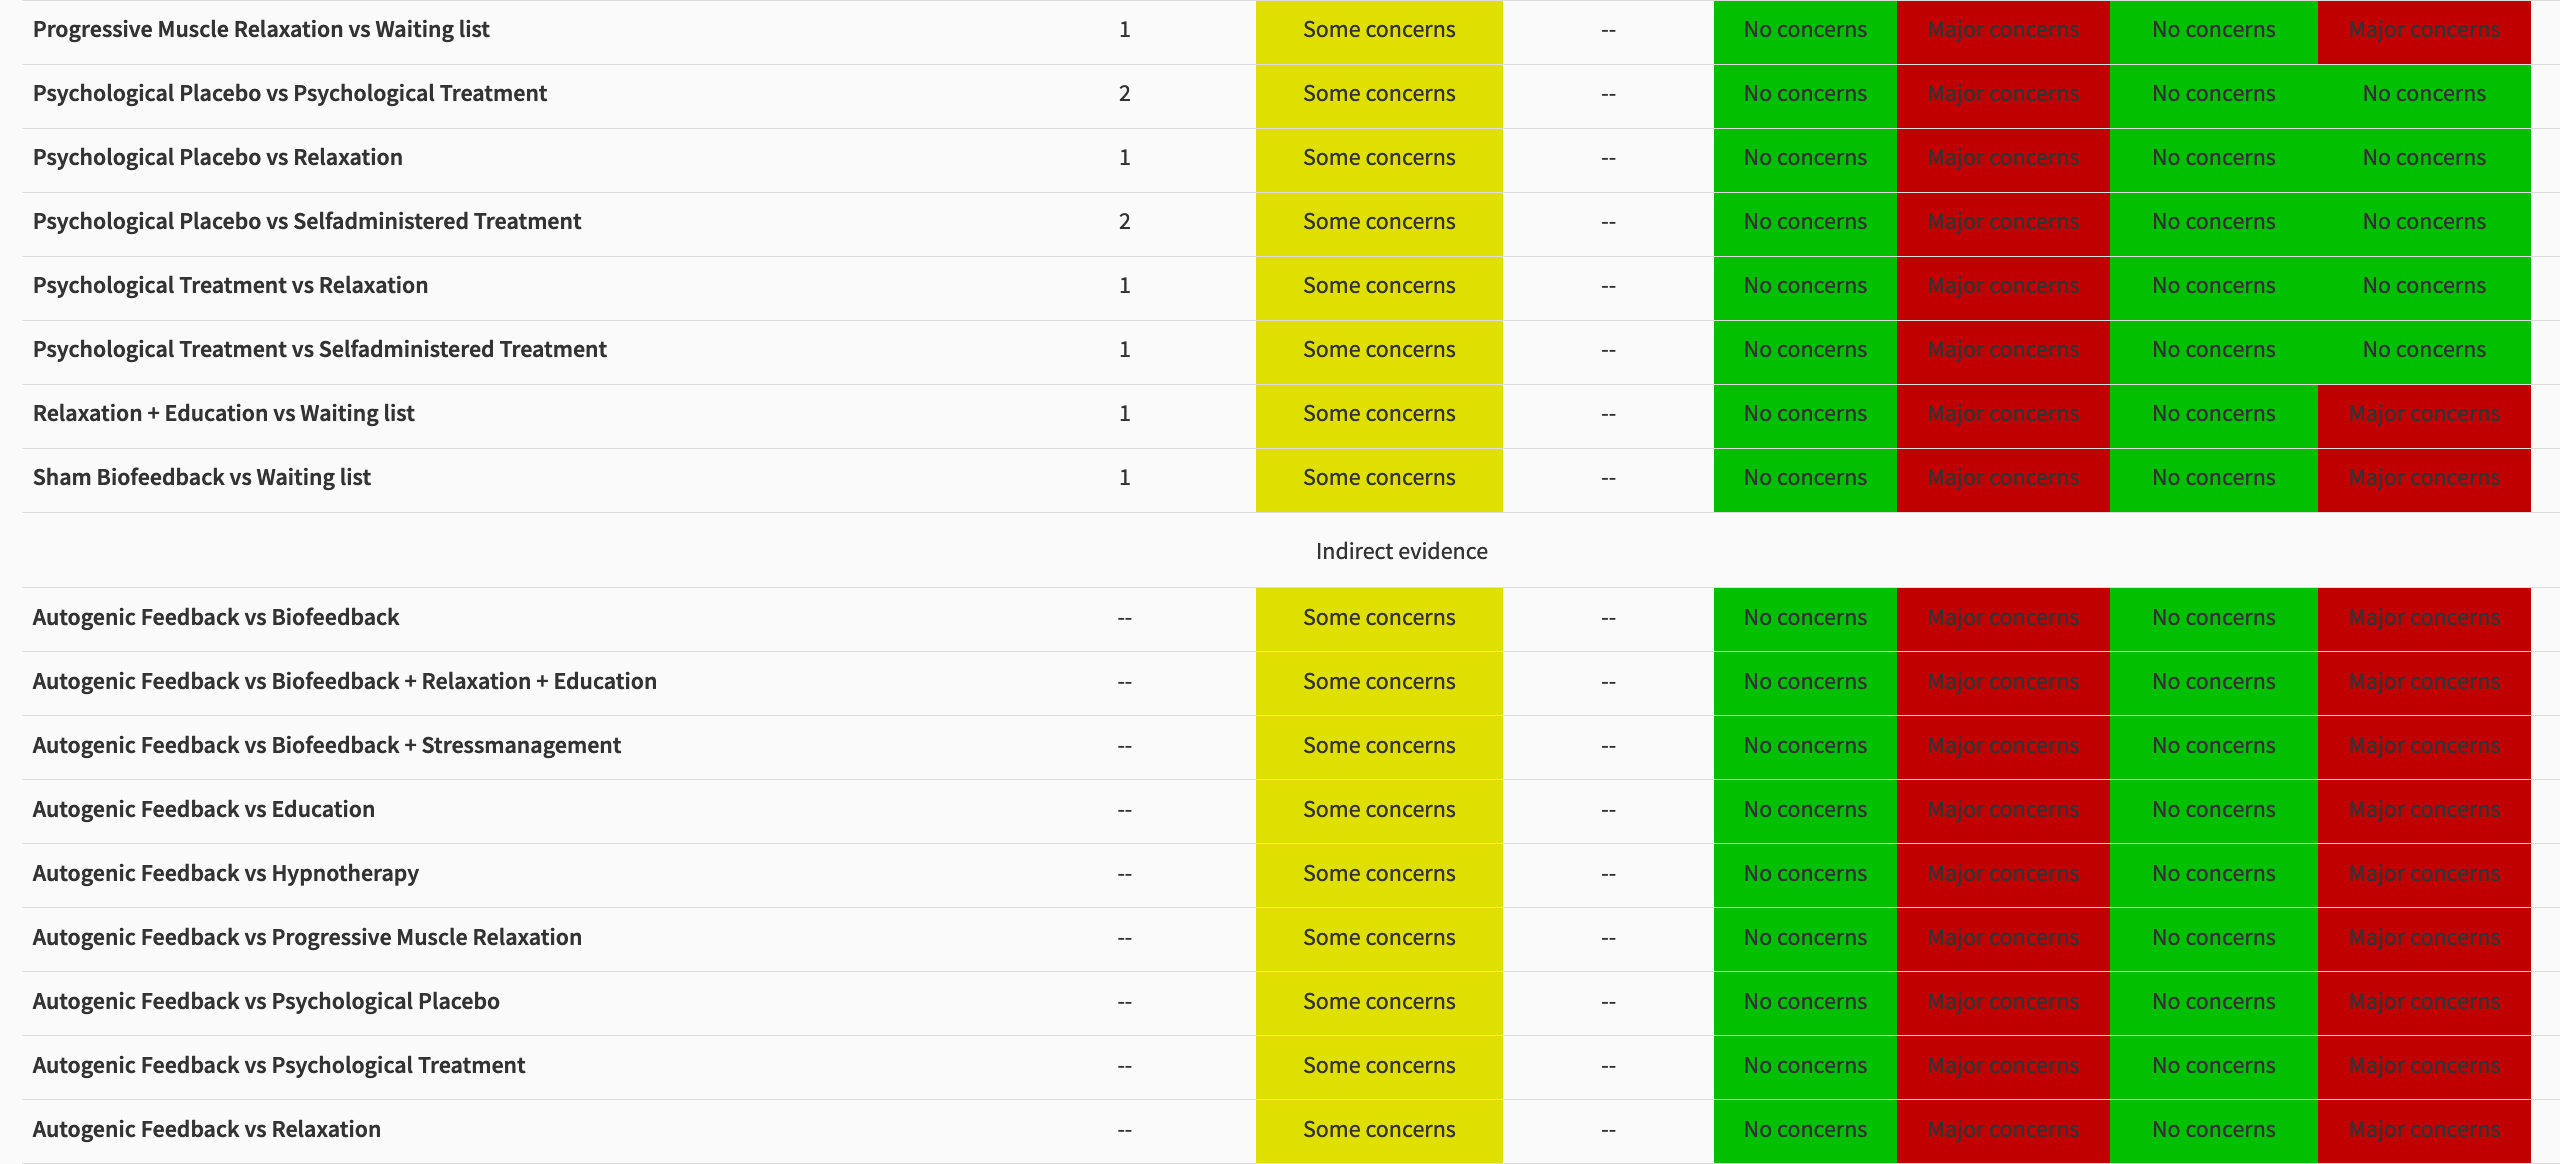

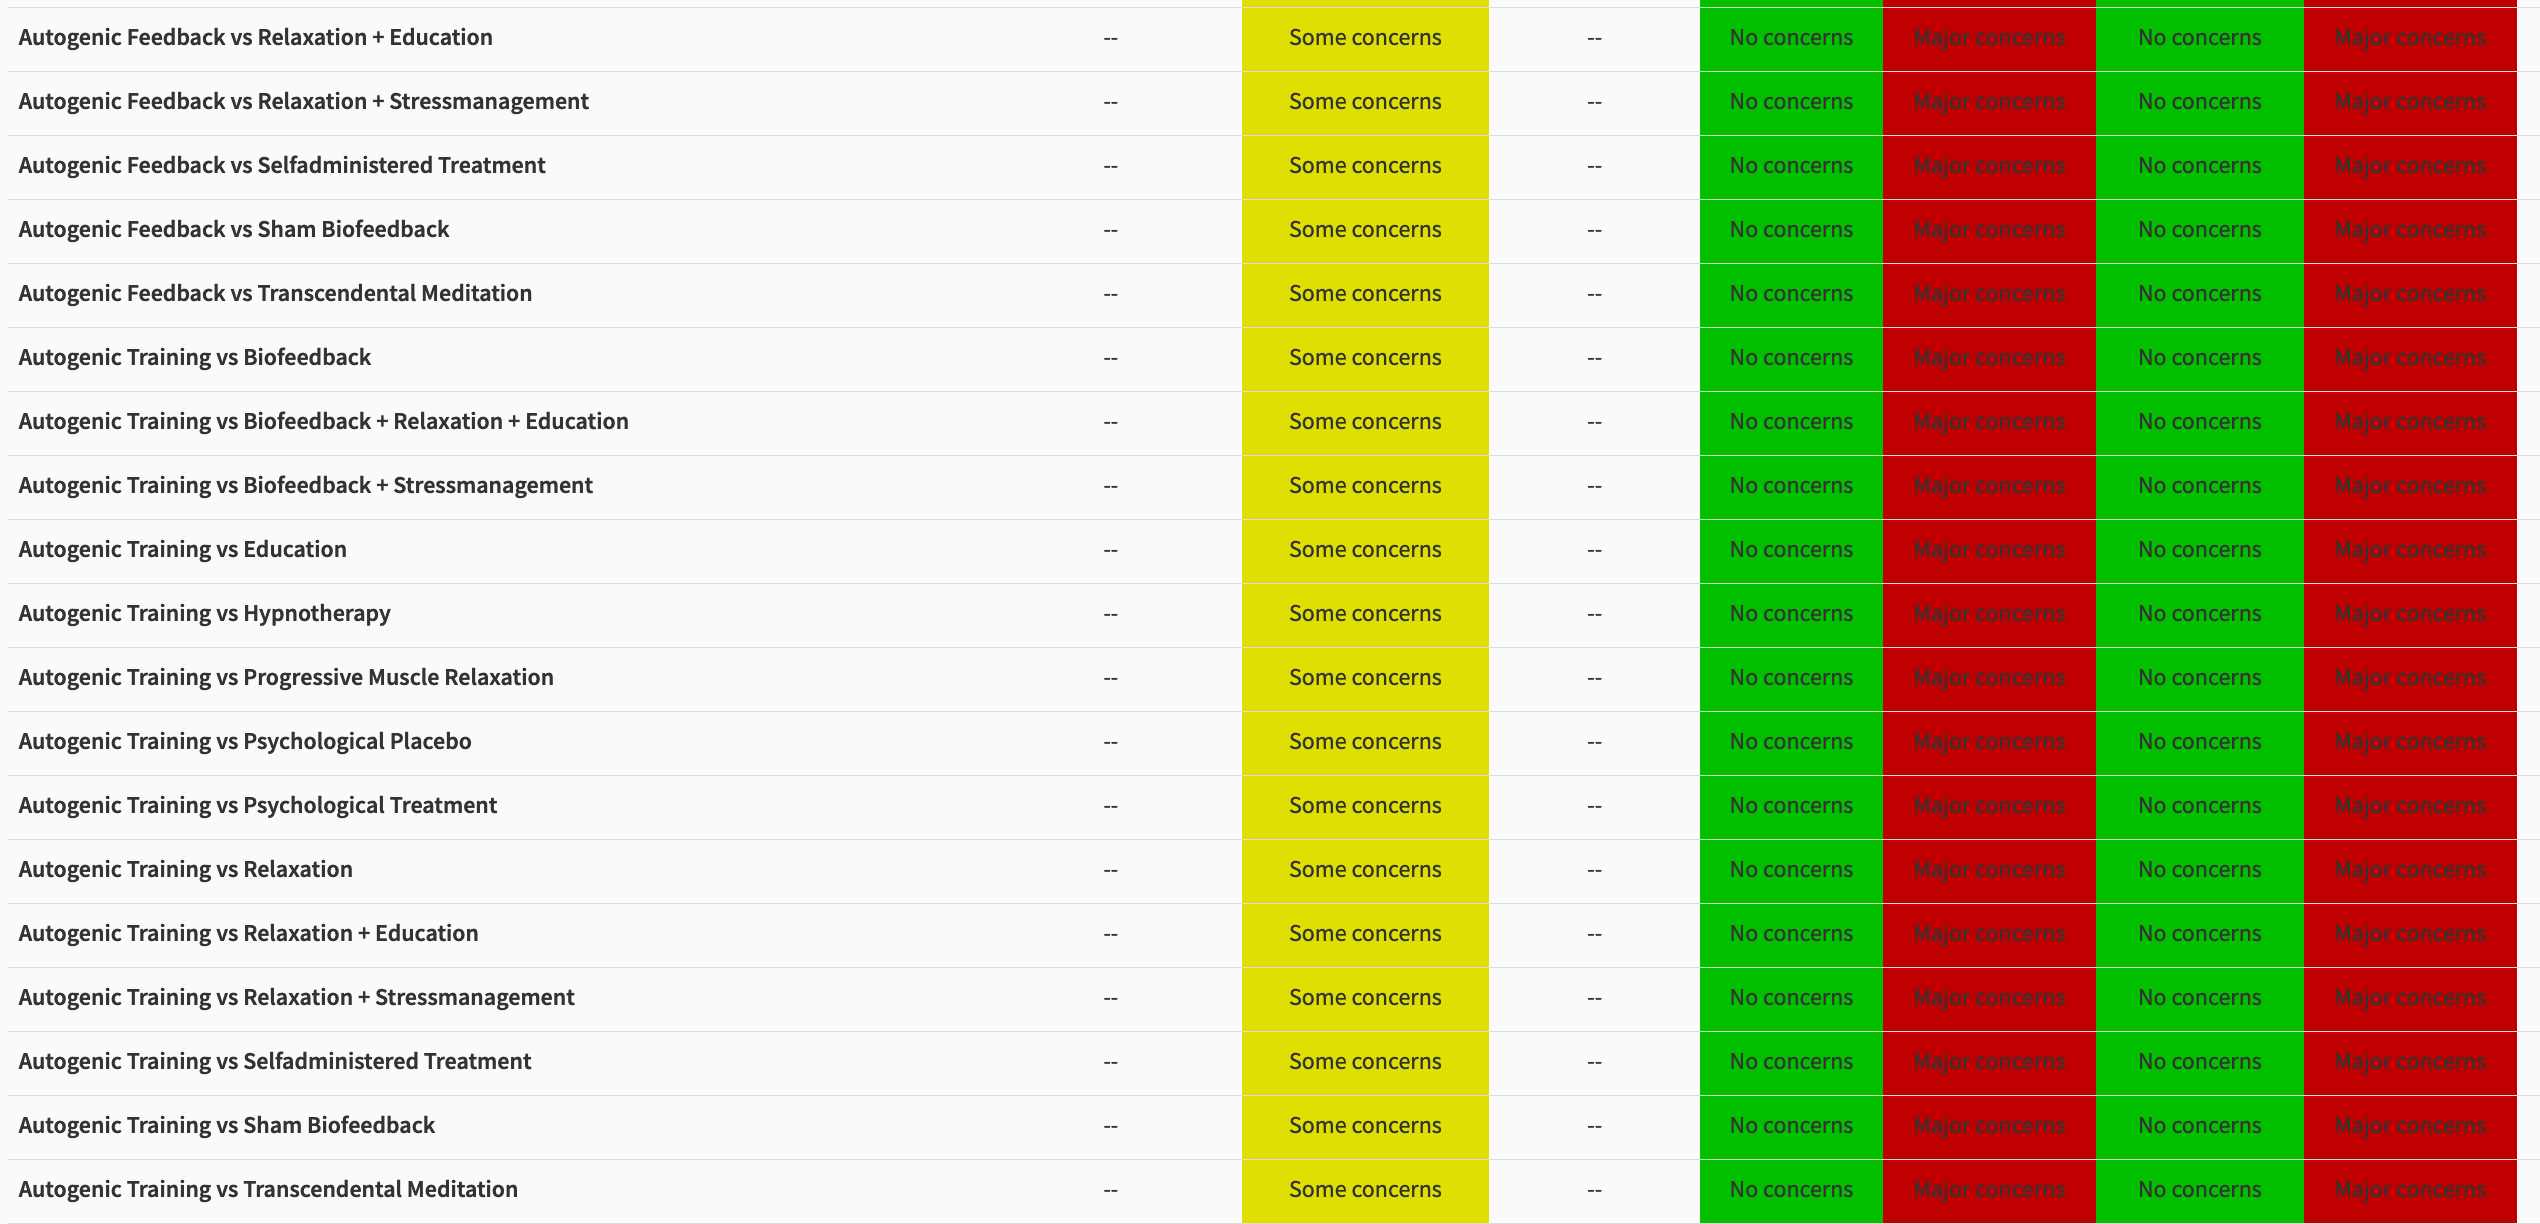

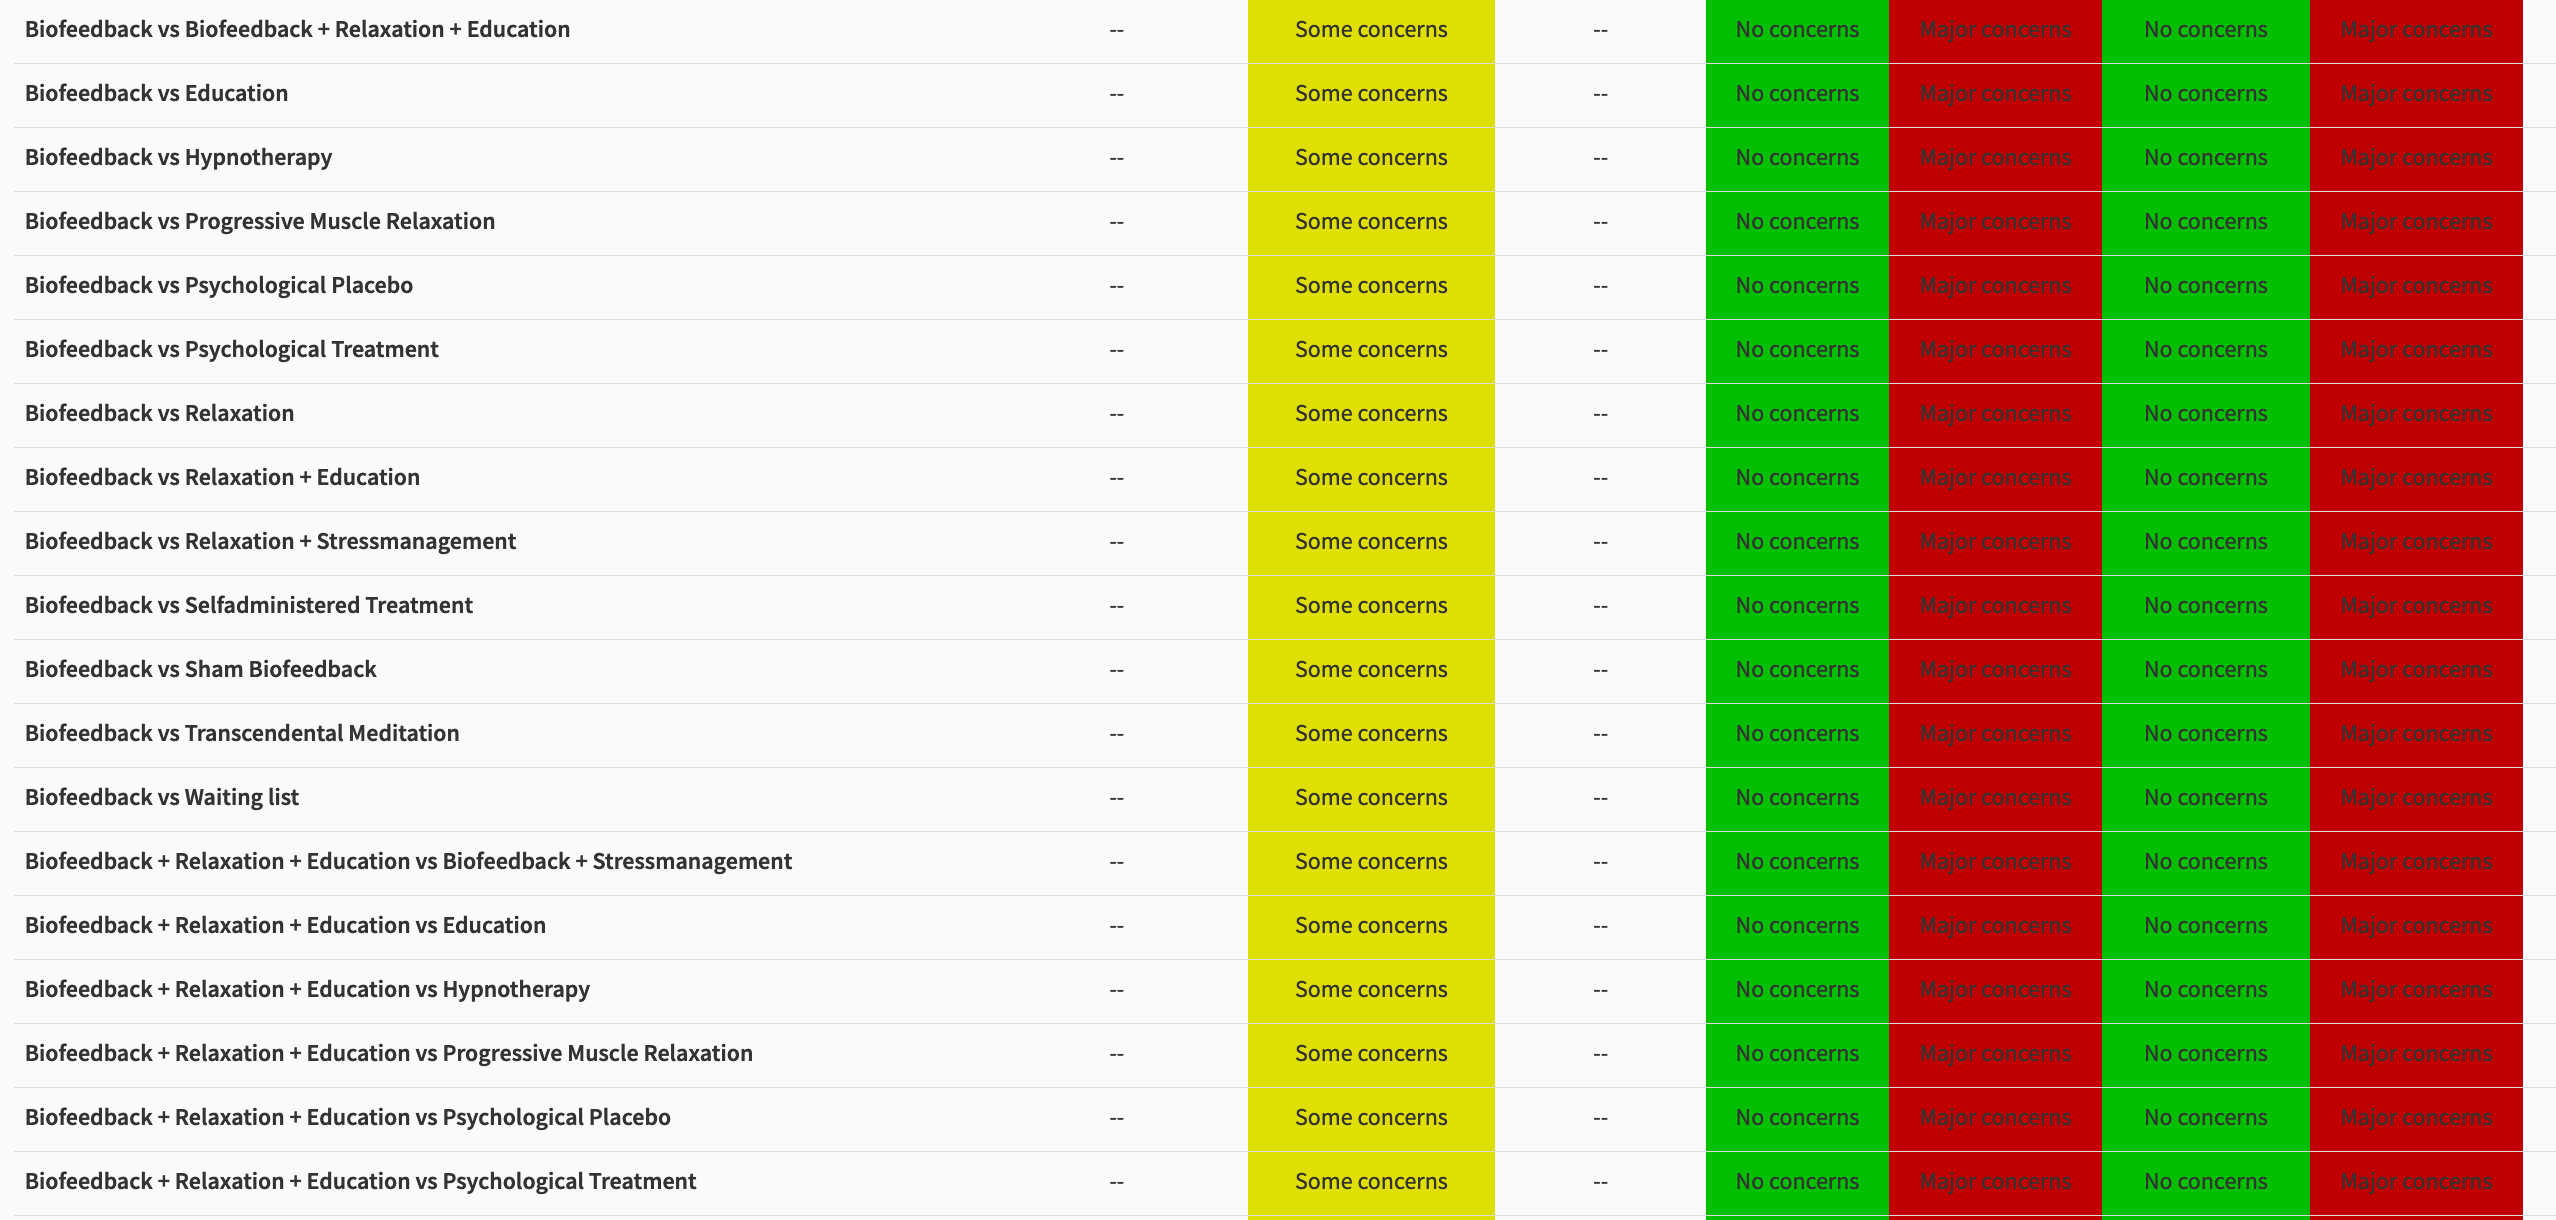

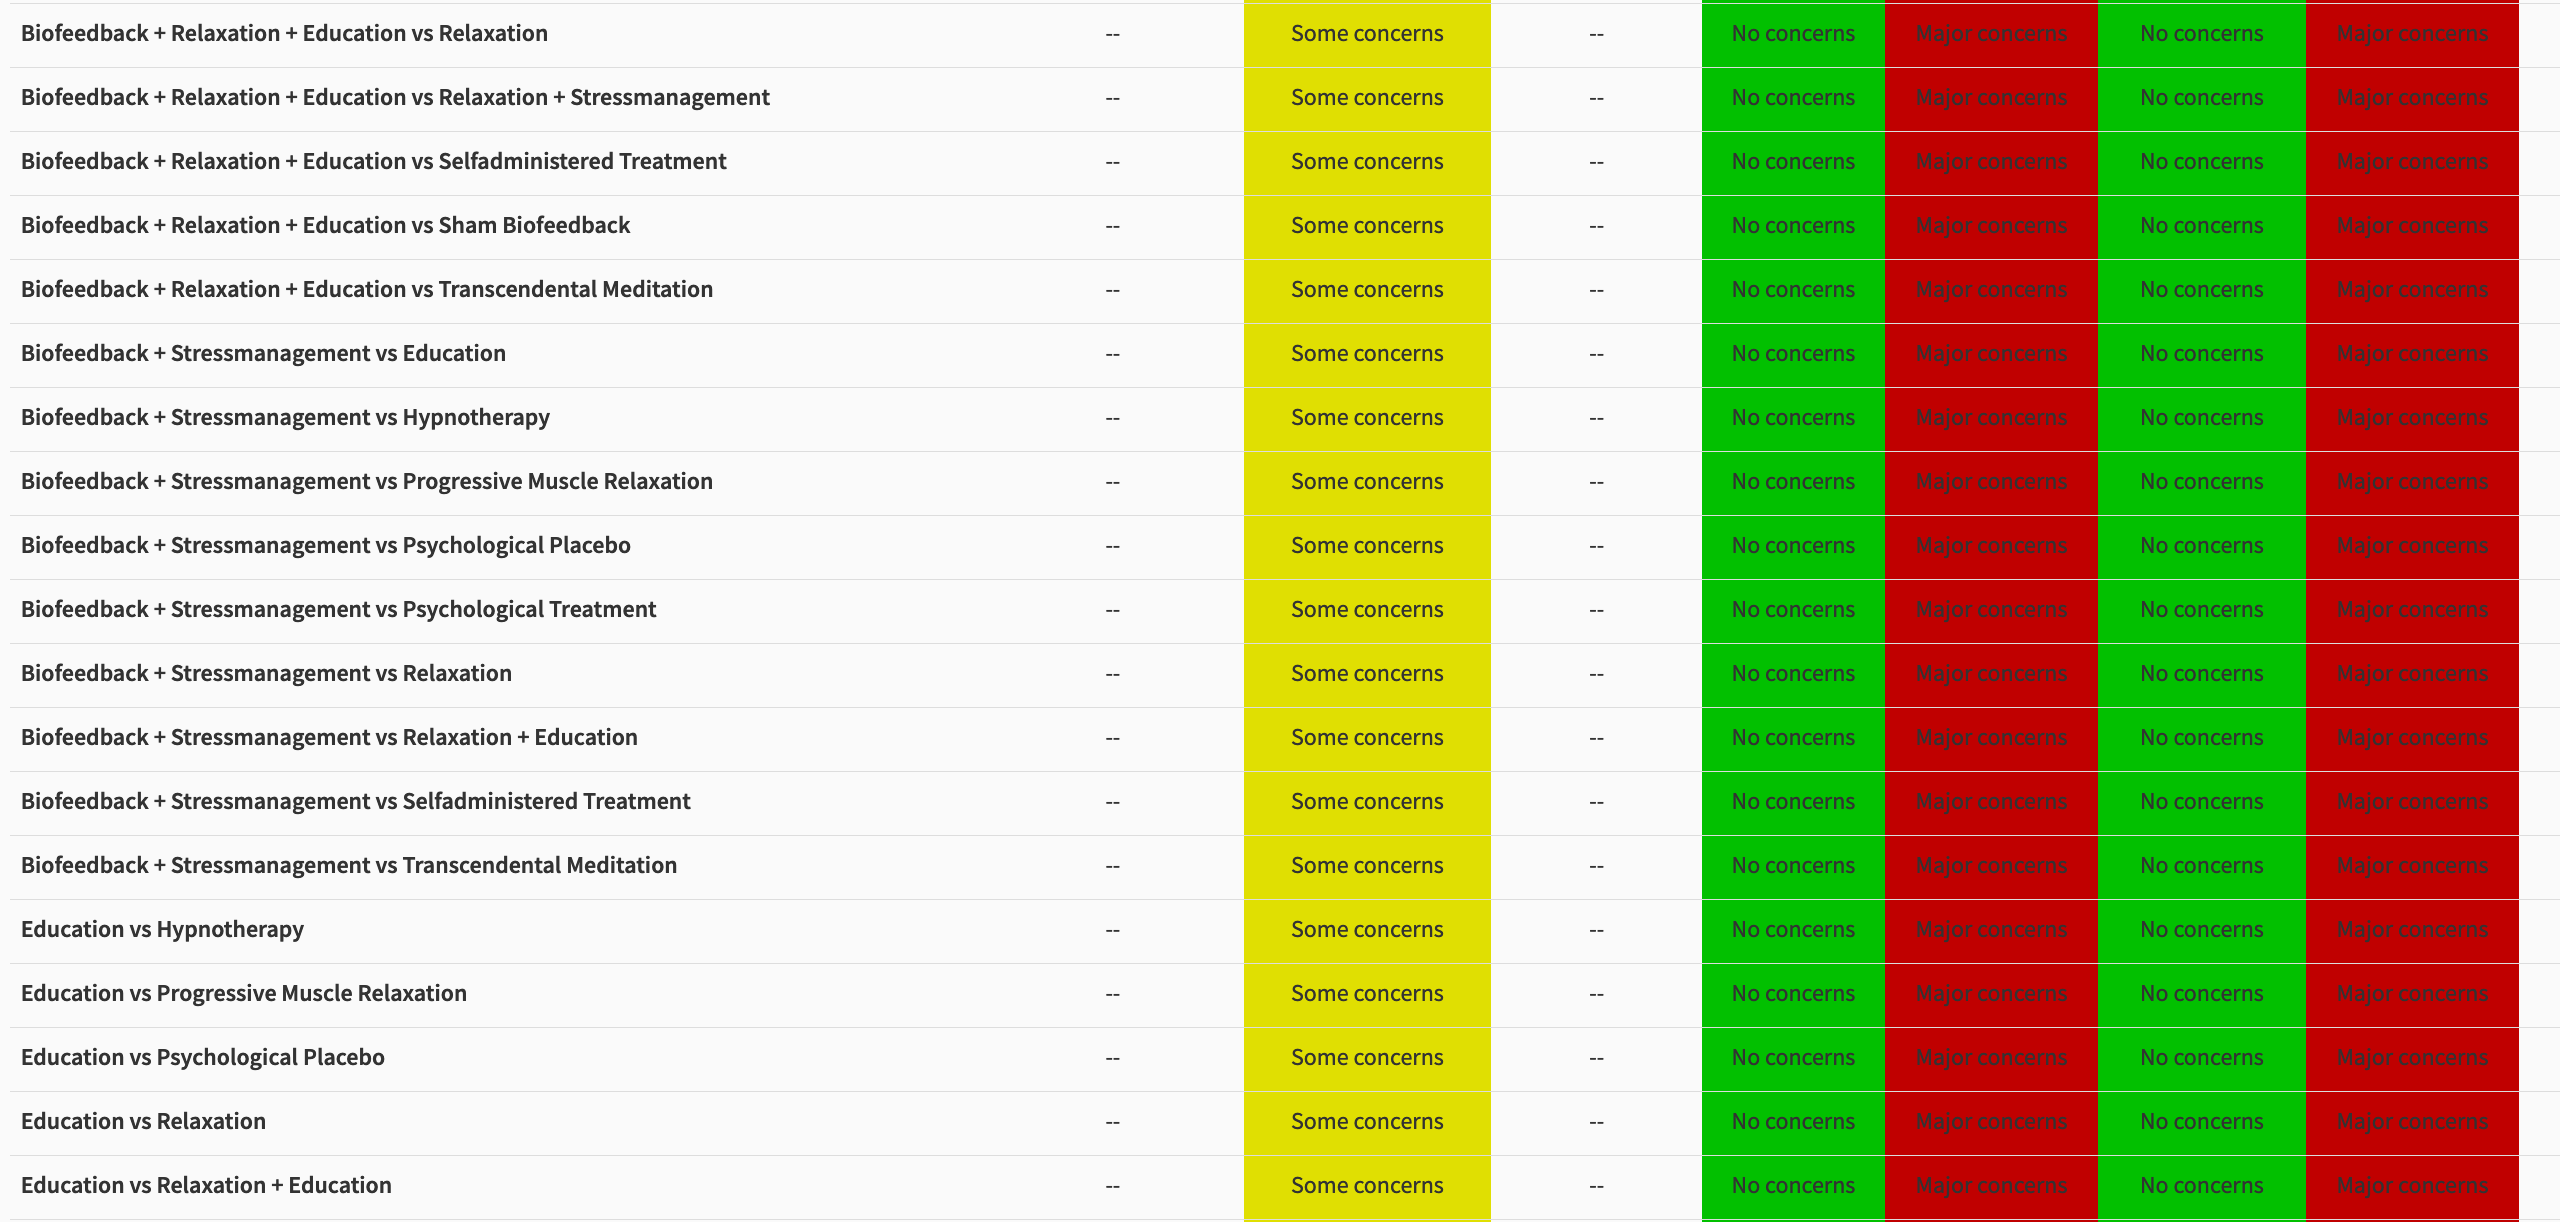

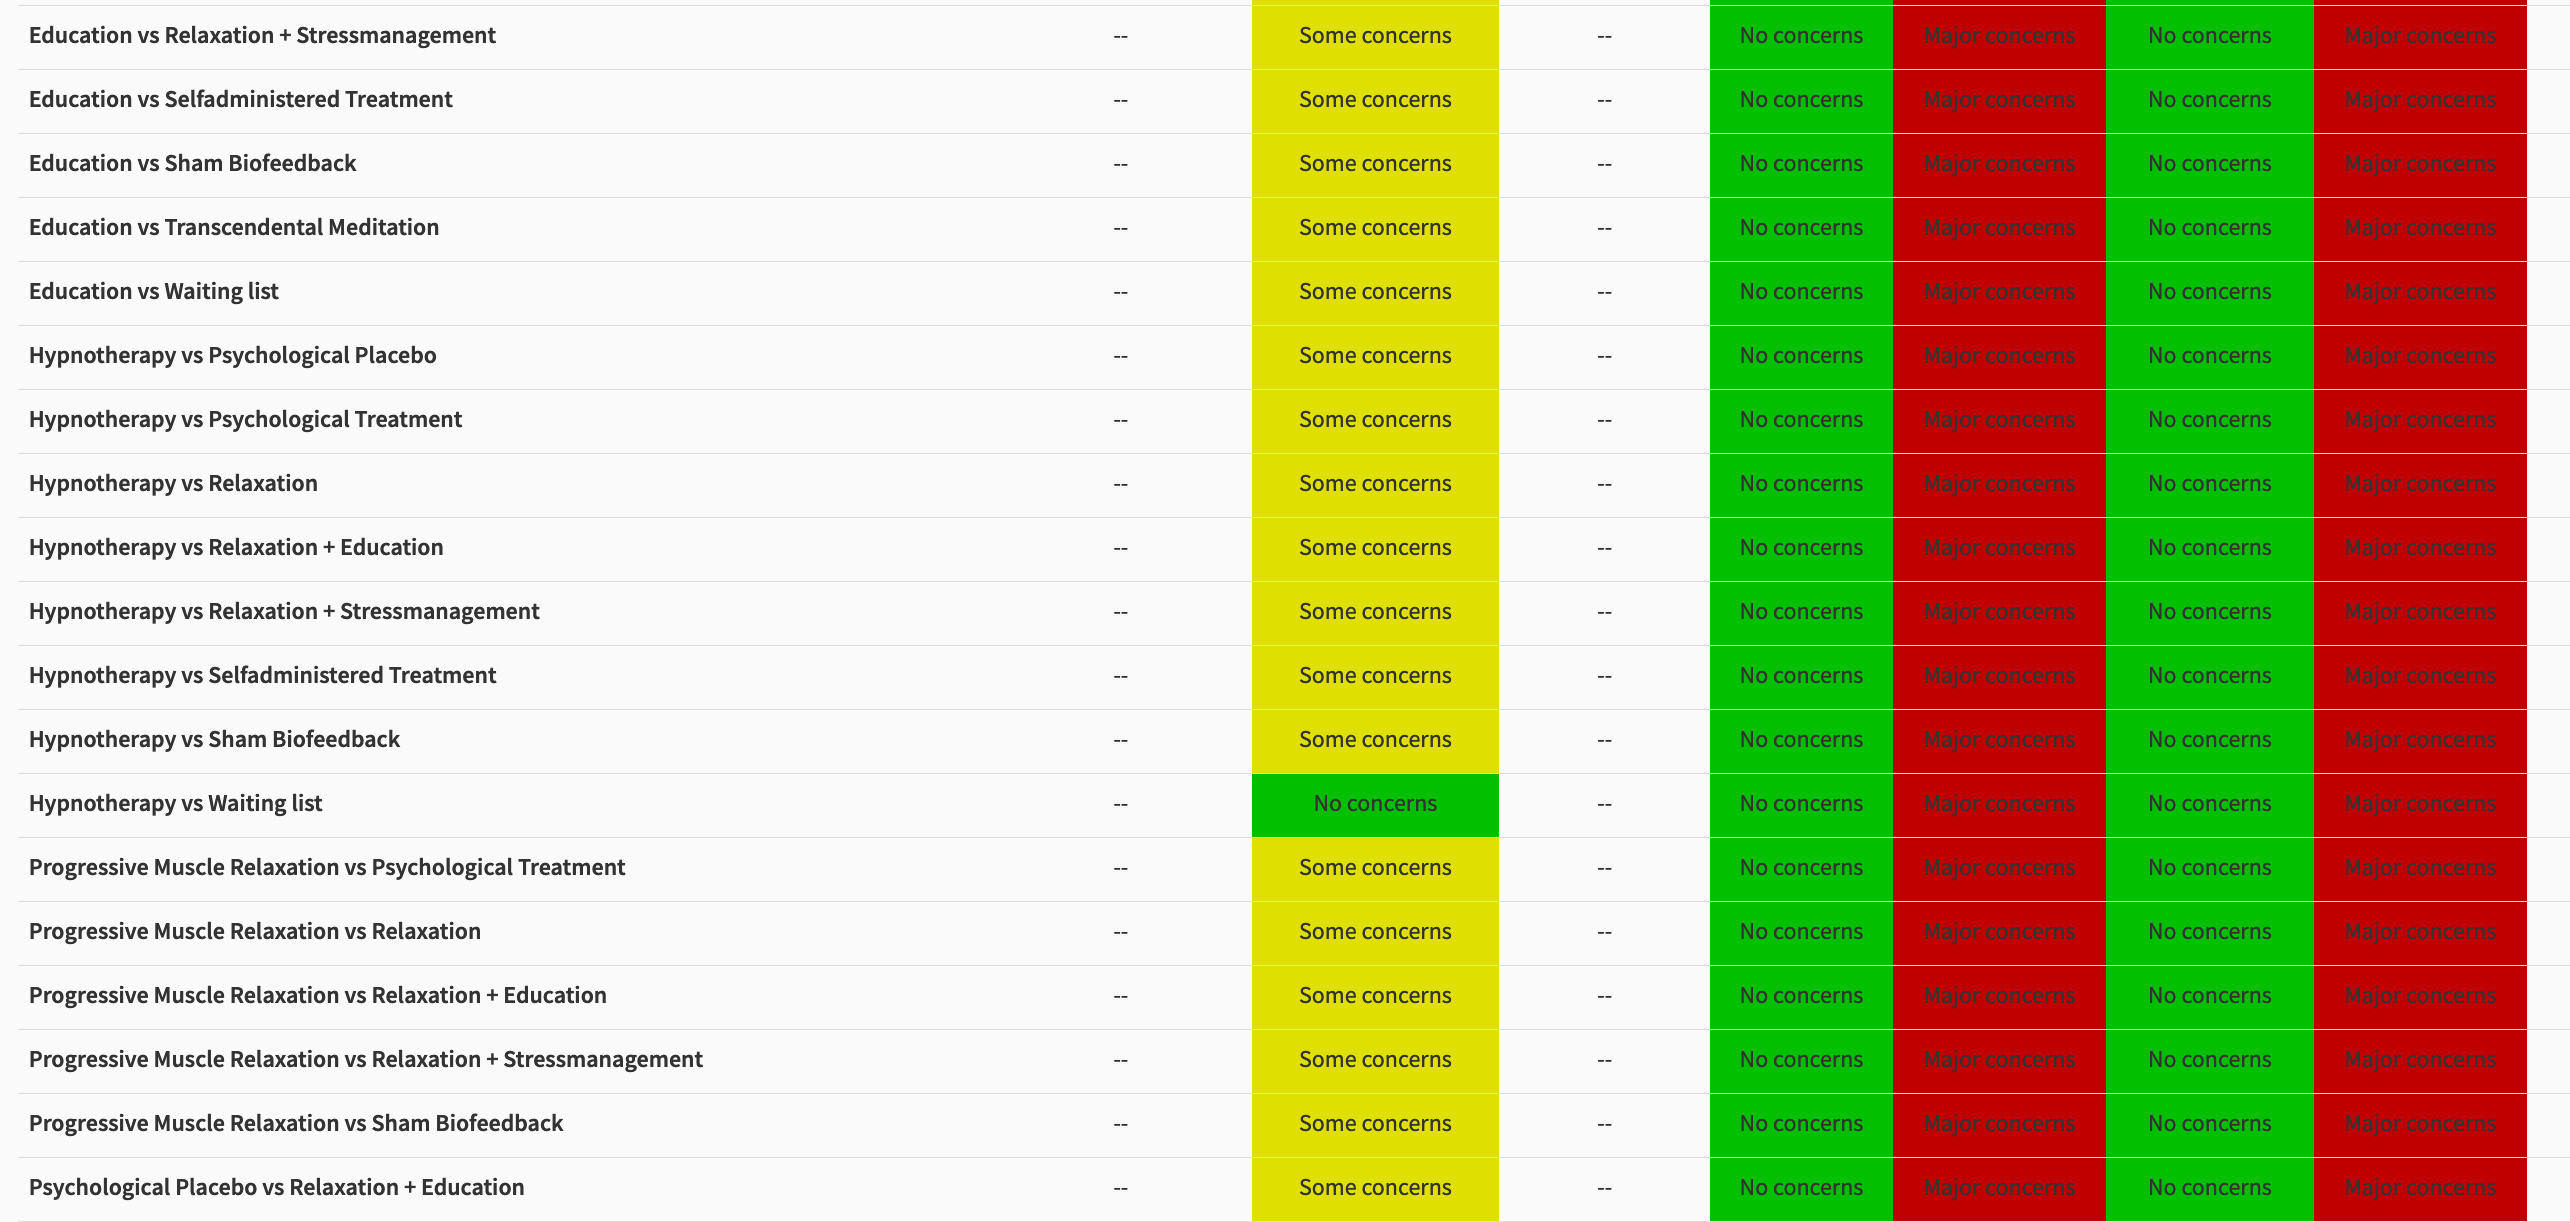

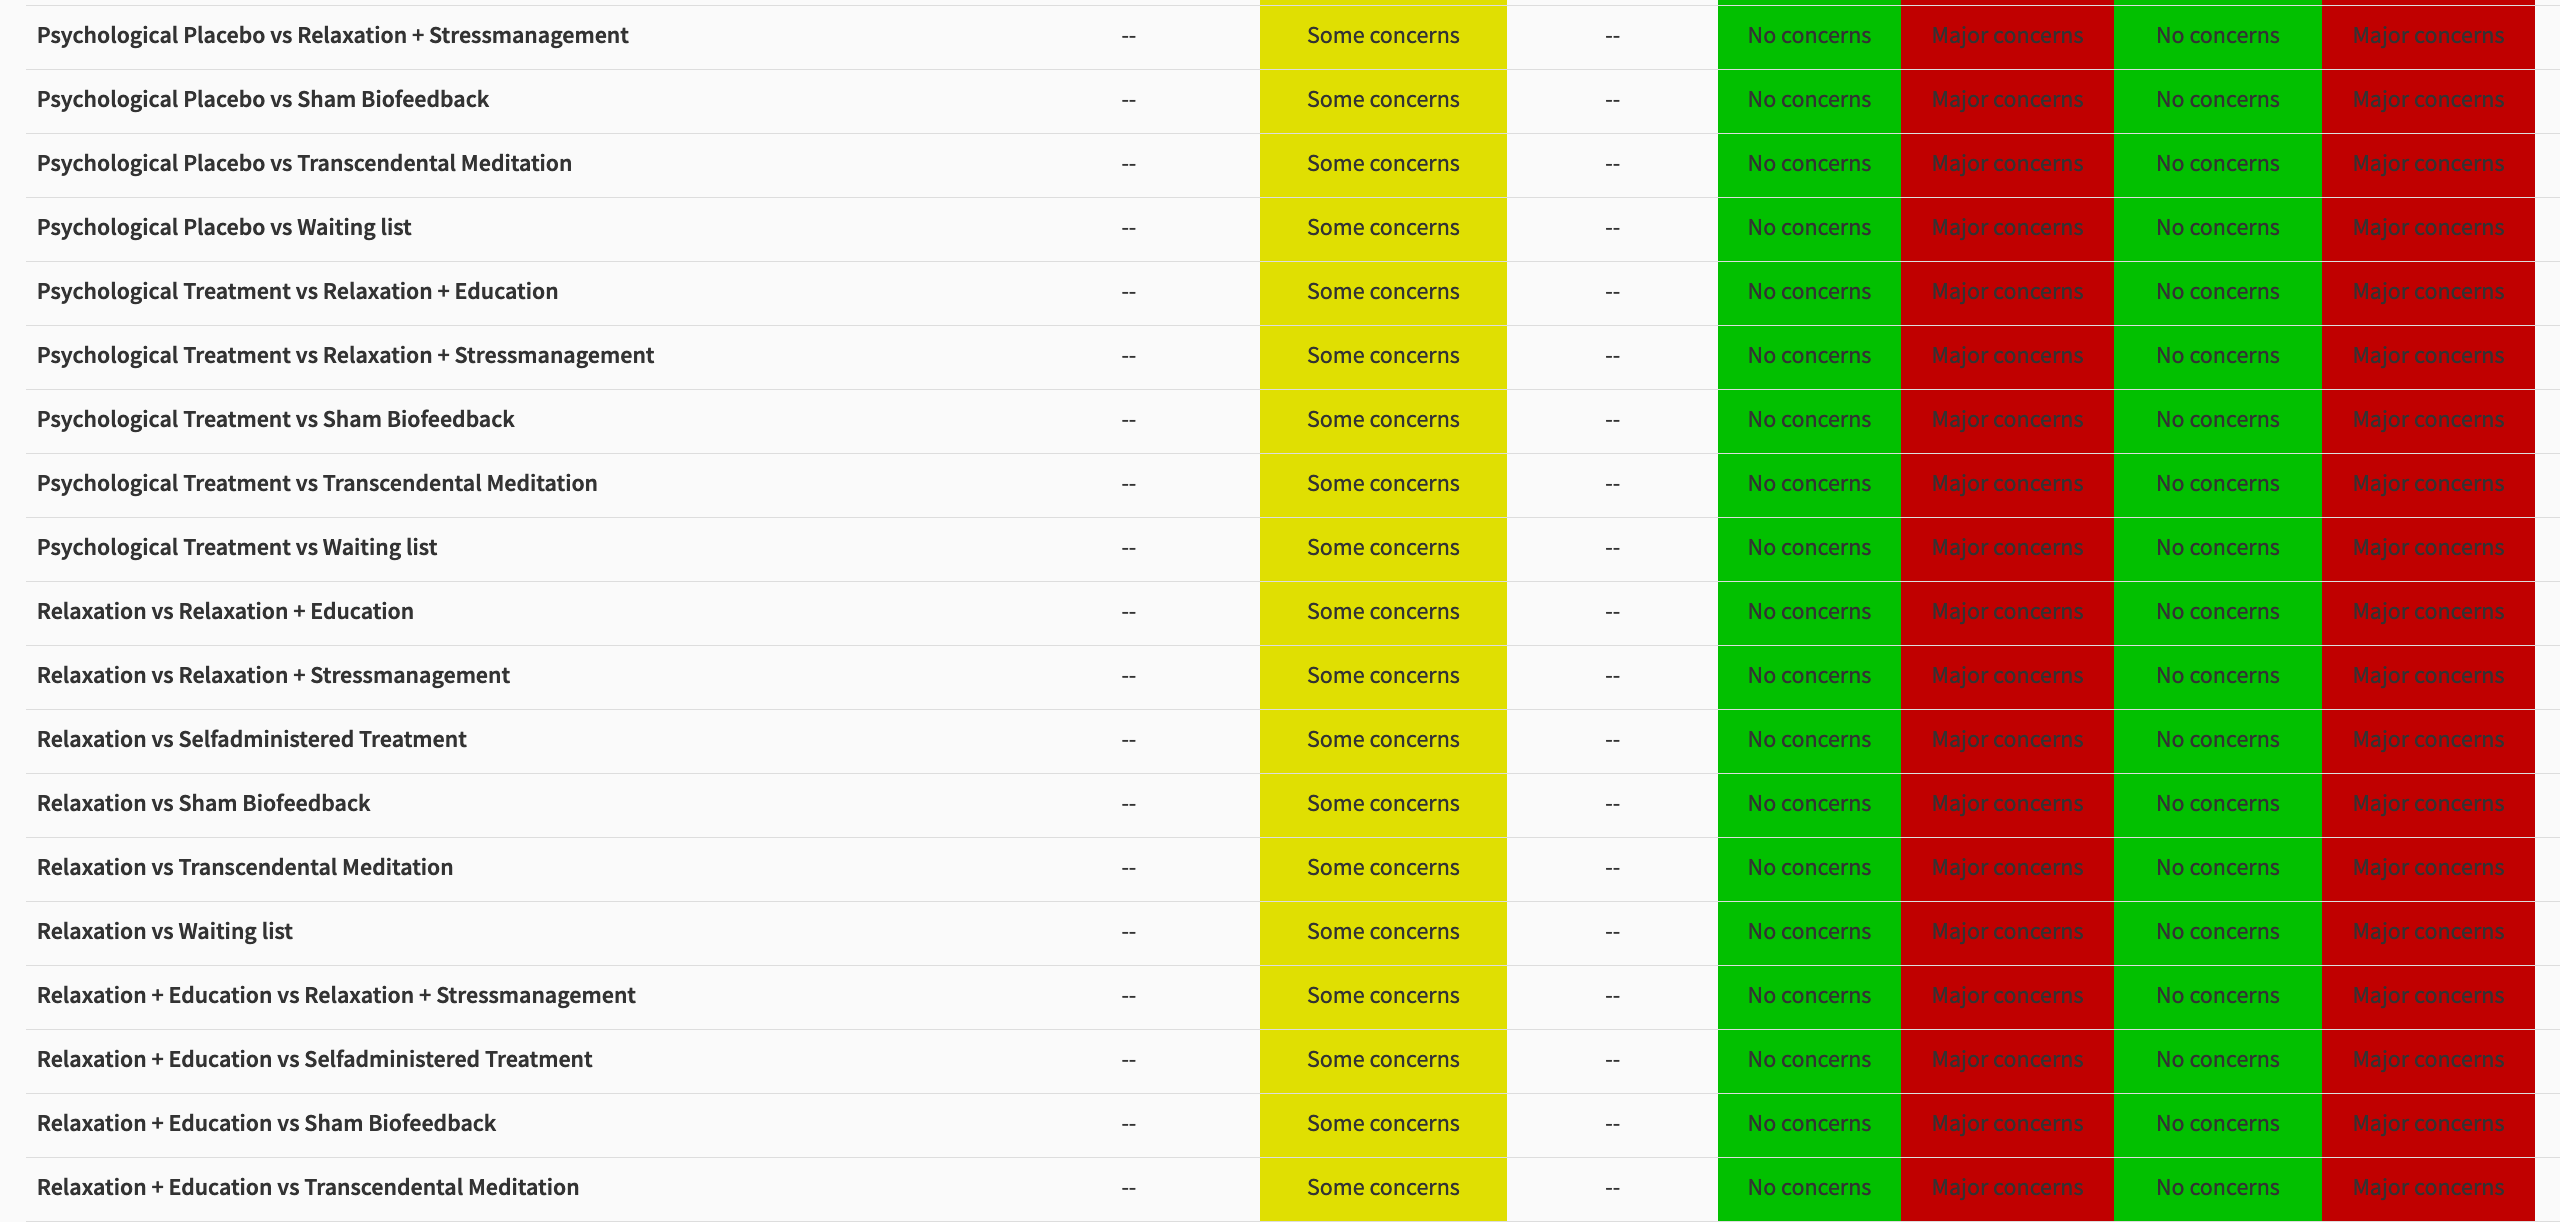

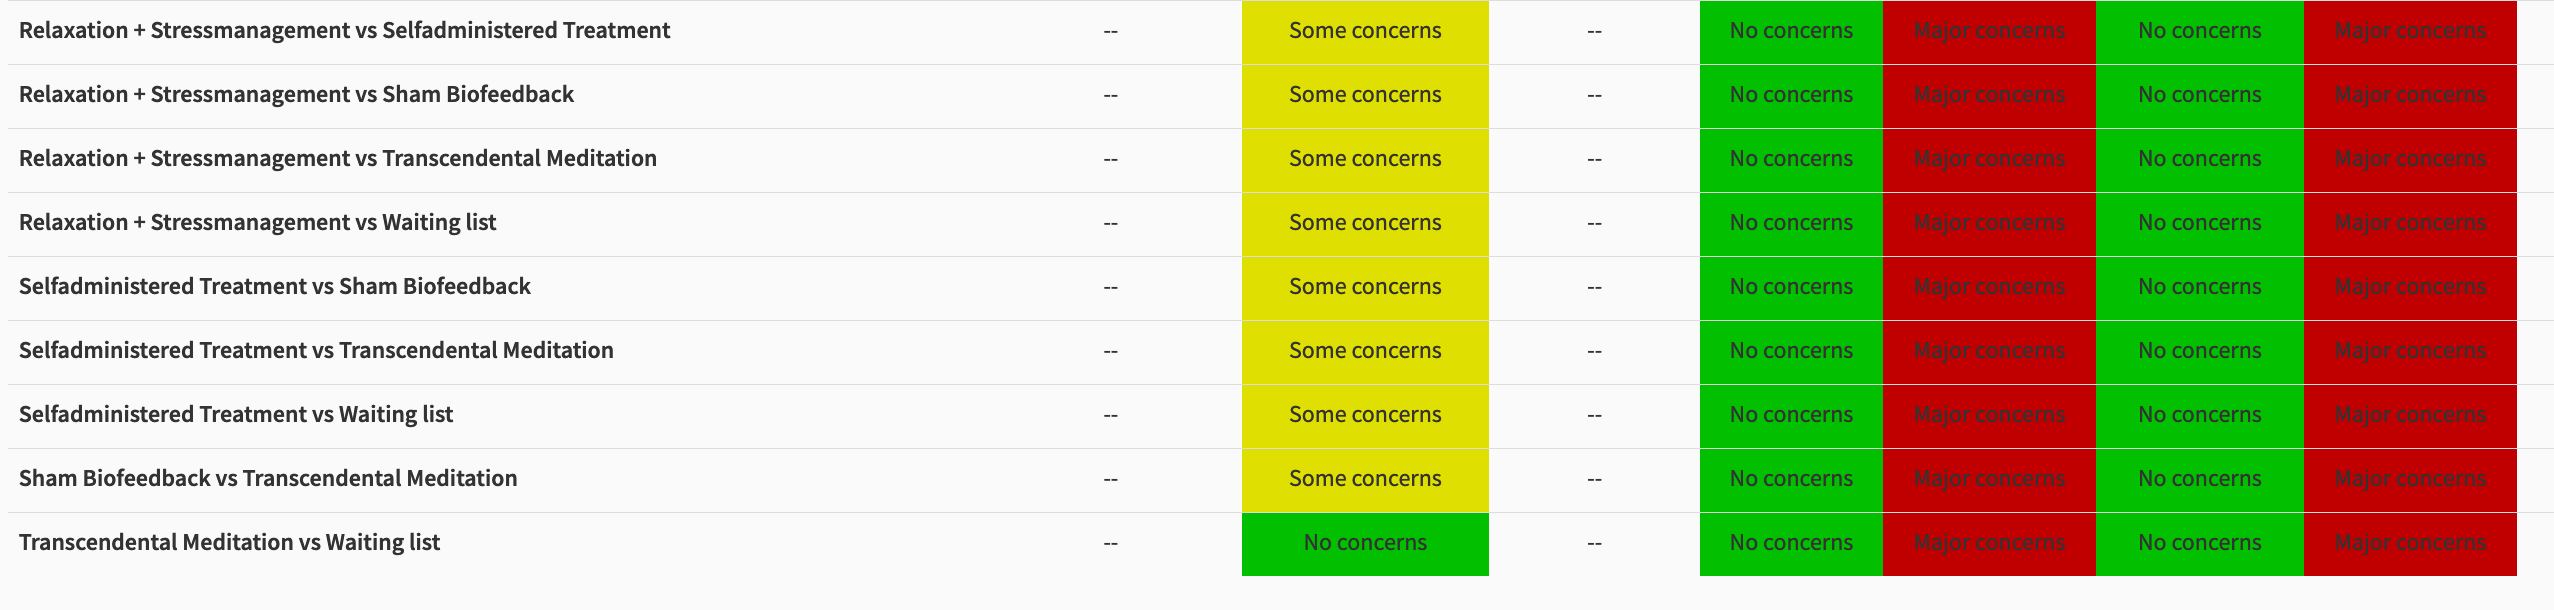
**

**eAppendix 5. Details on Inconsistency**

**Short-term efficacy – Local approach**

**
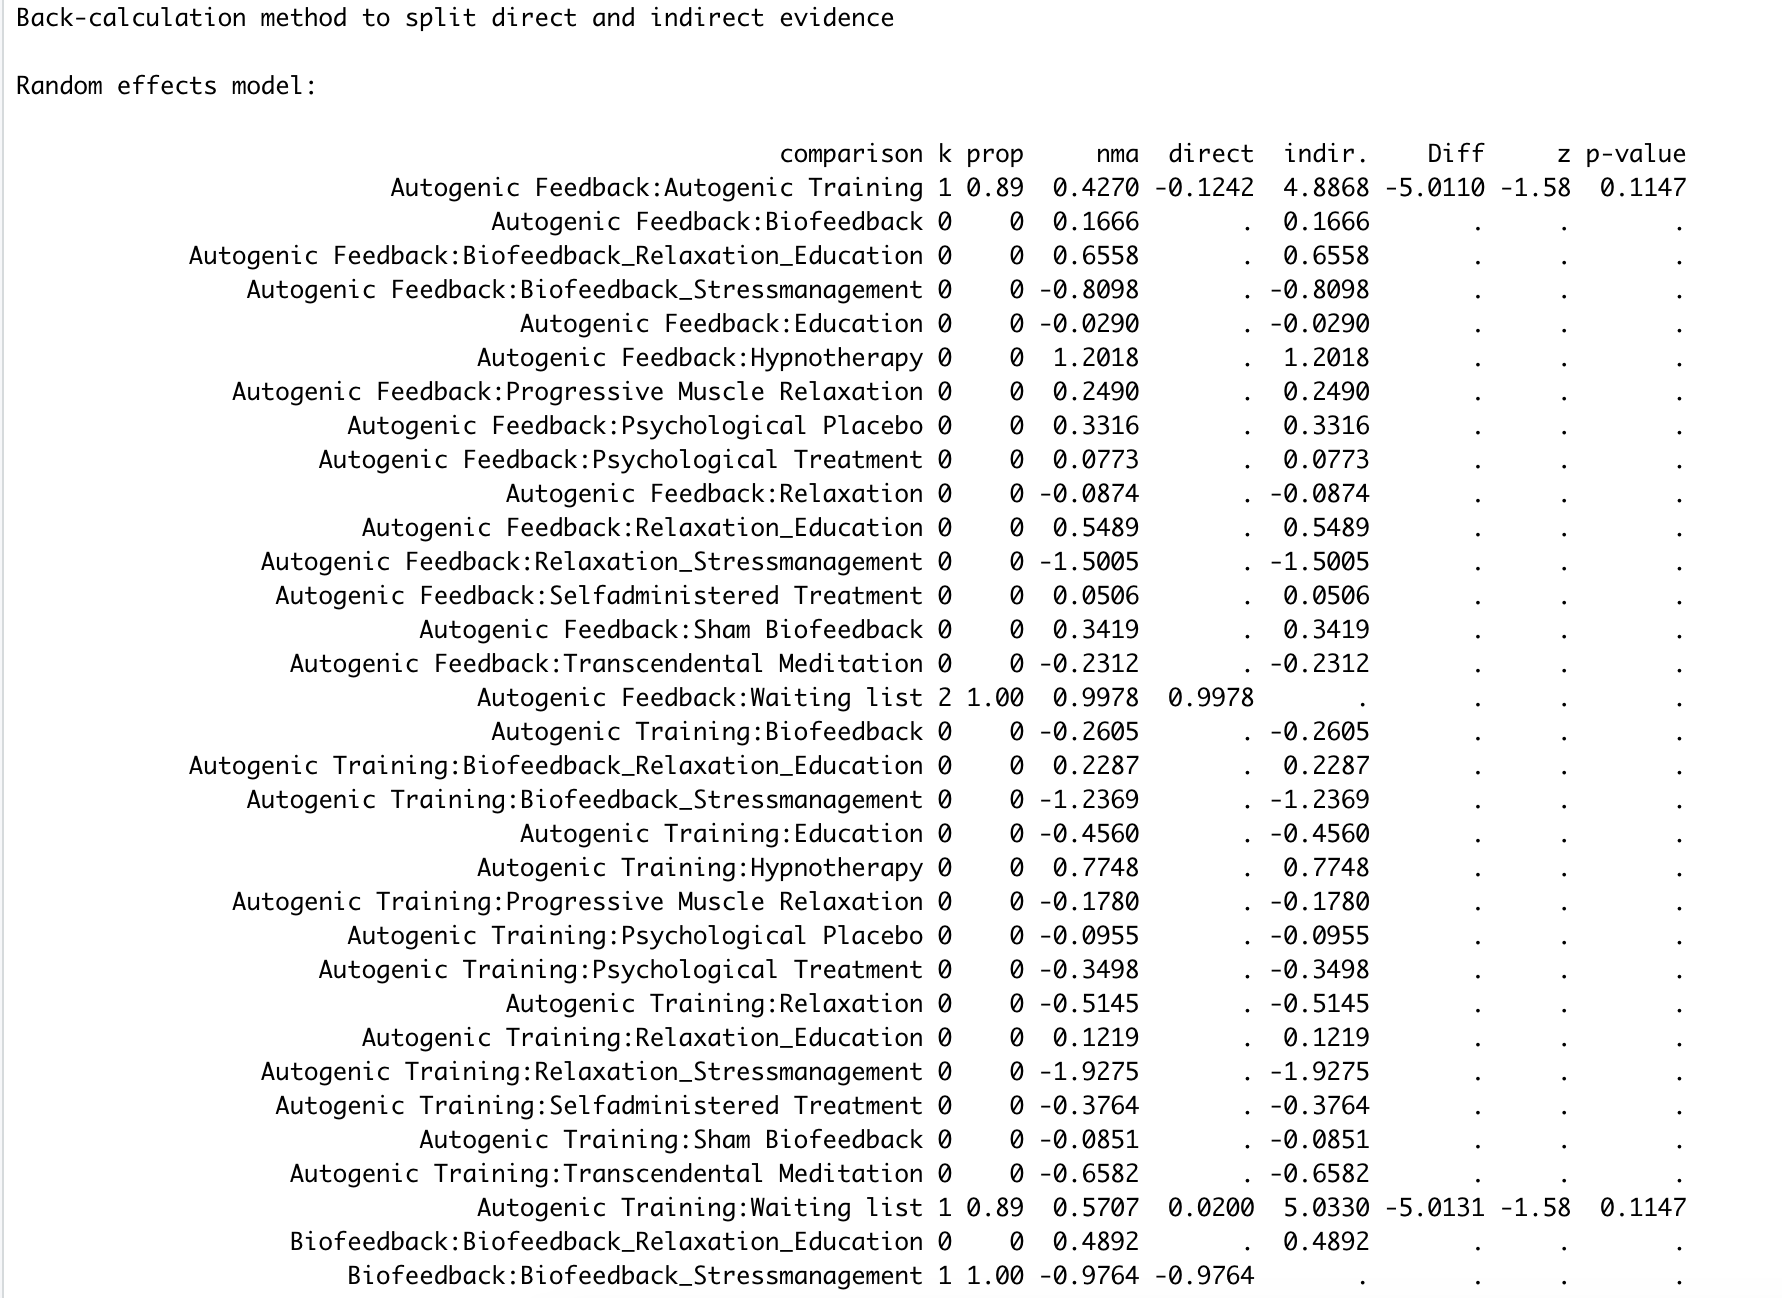
**

**
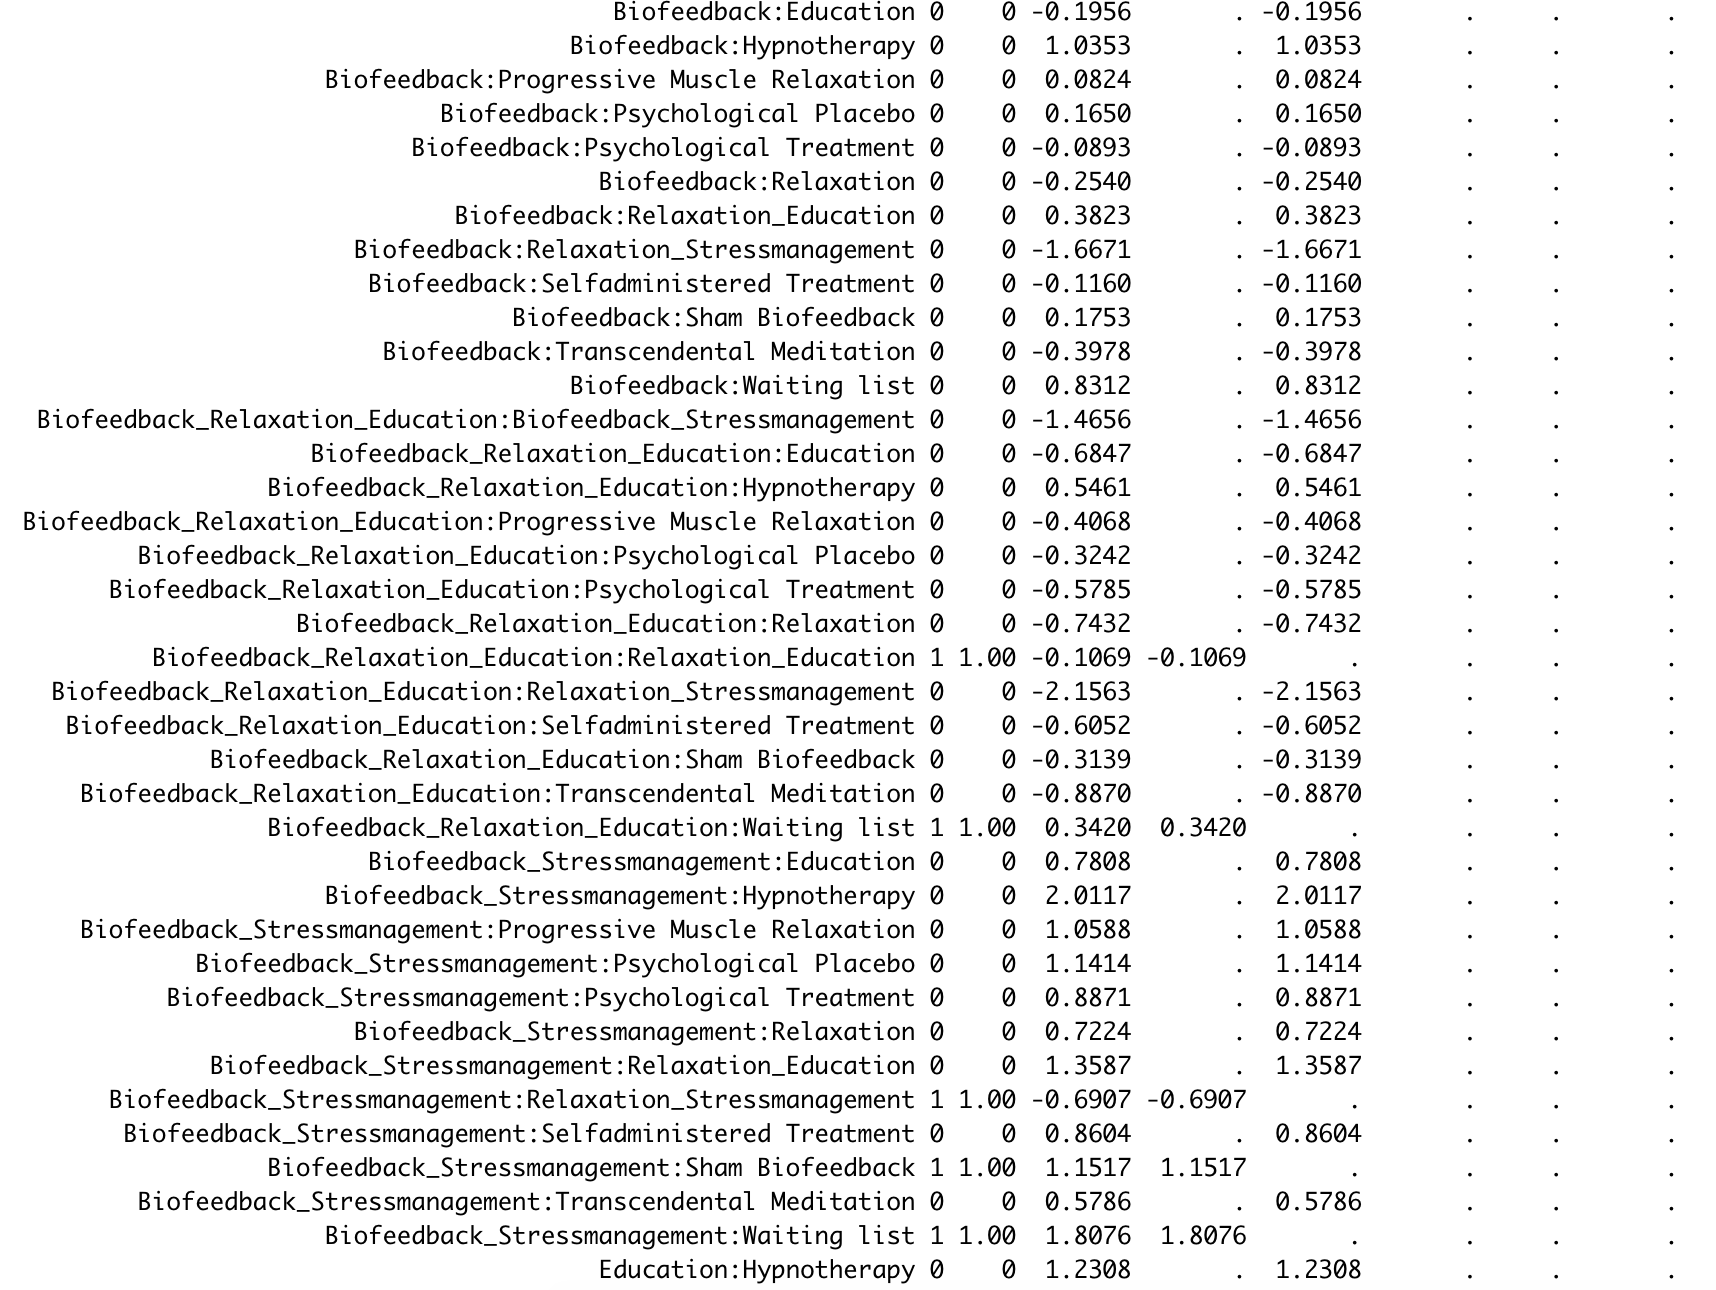
**

**
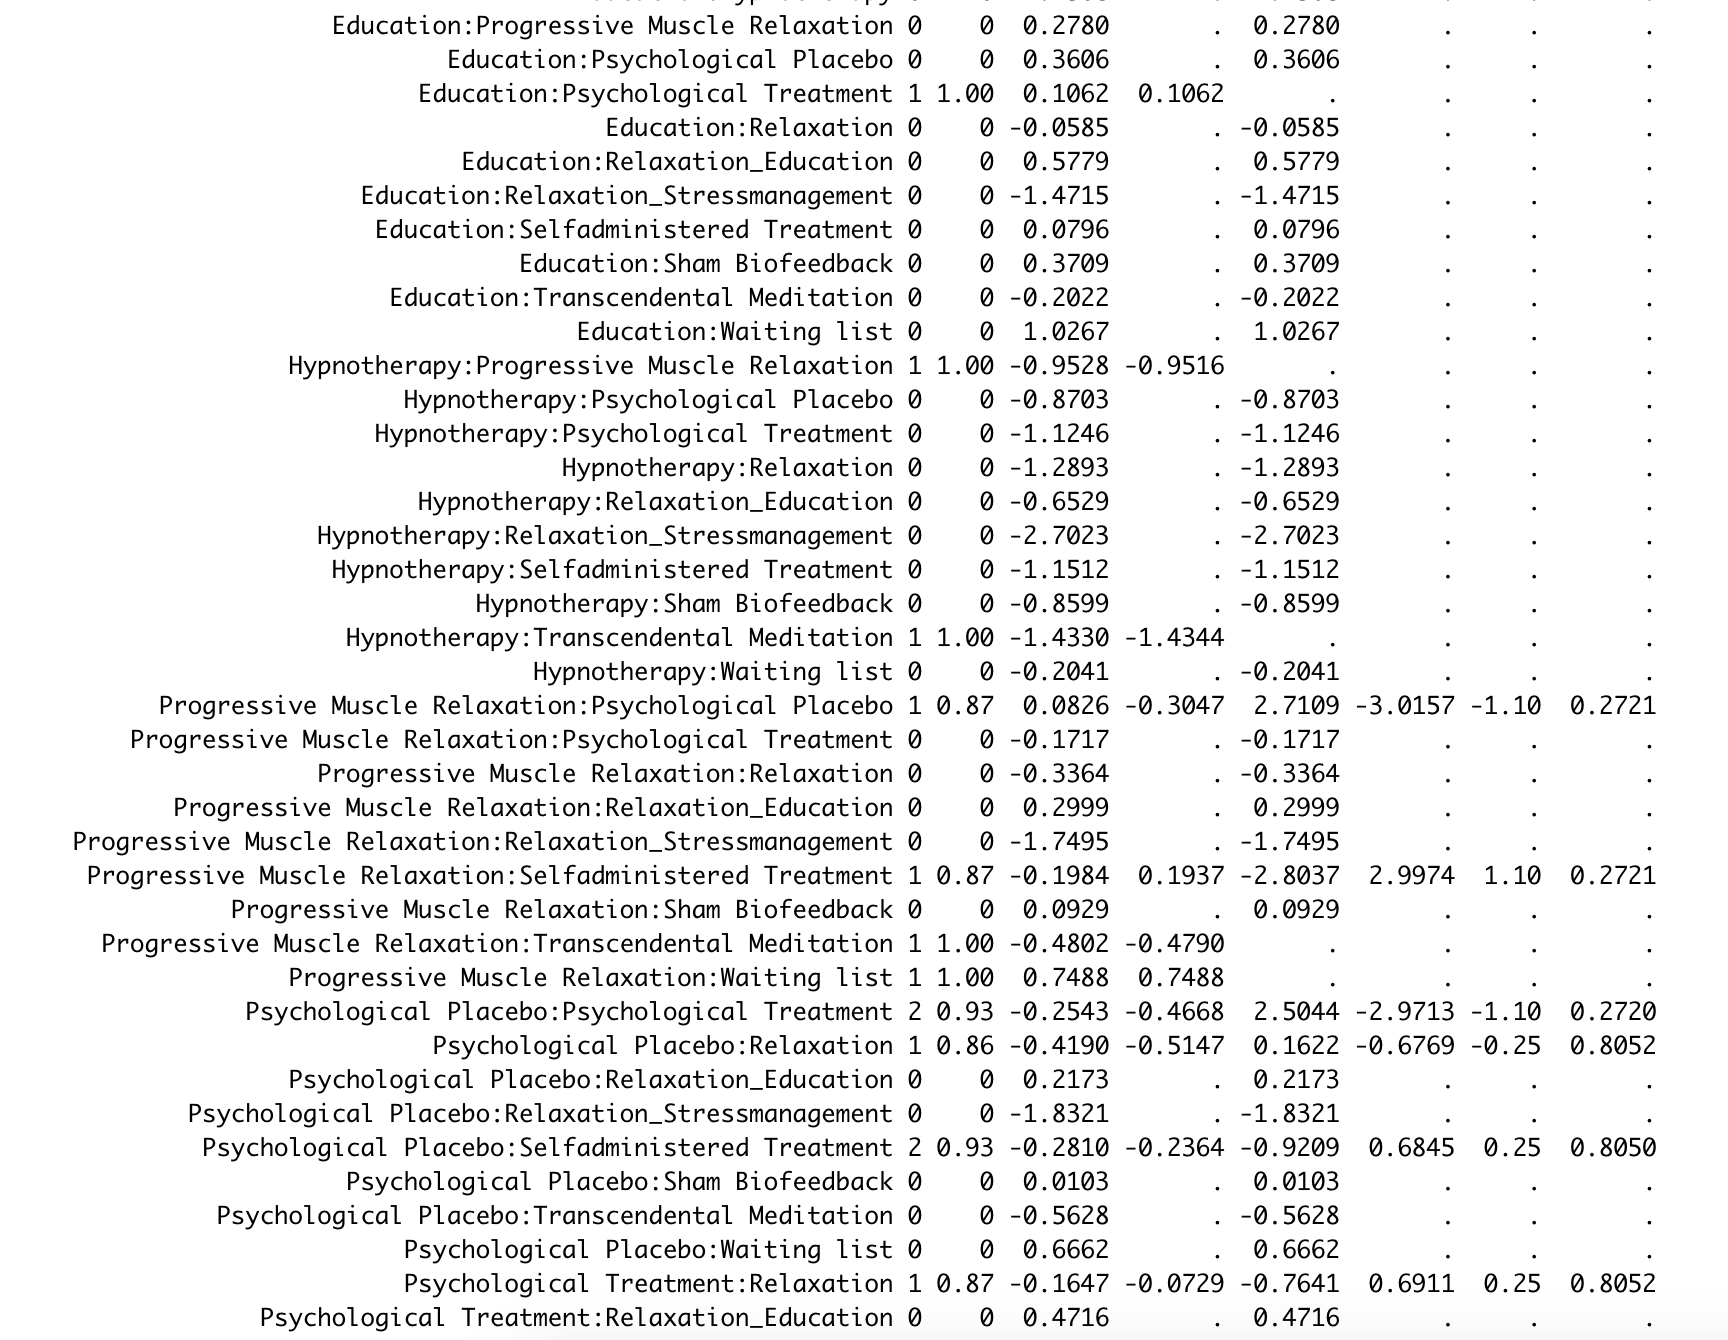
**

**
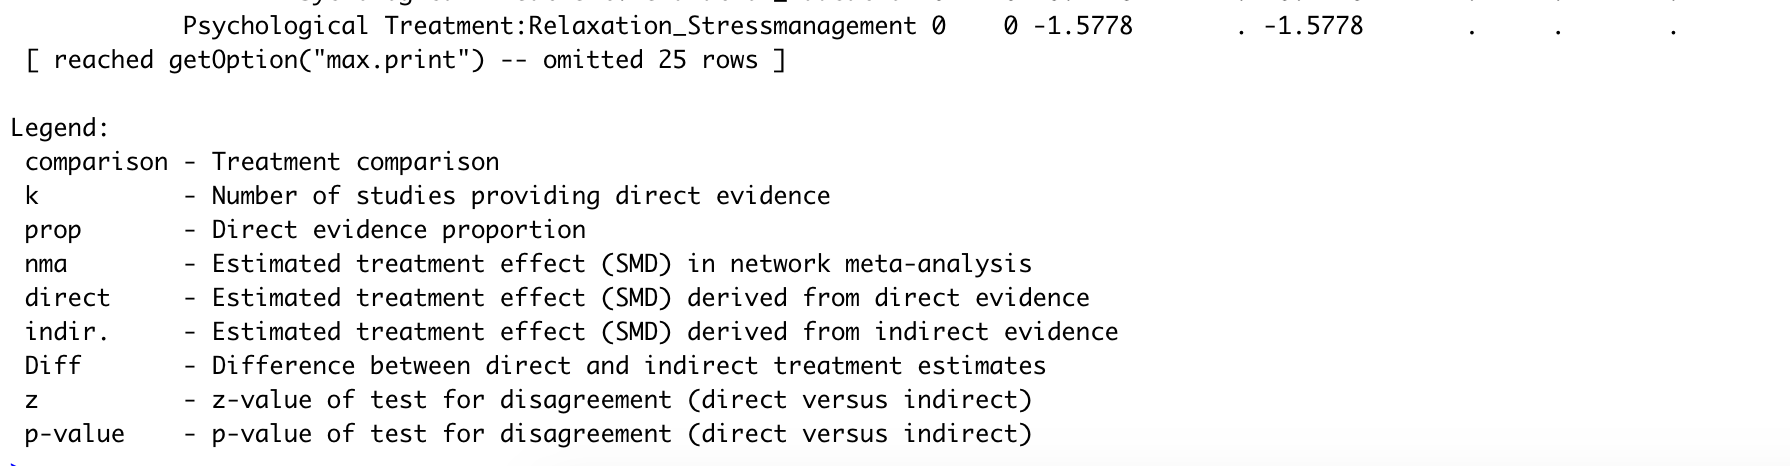
**

**Short-term efficacy – Global approach**

**
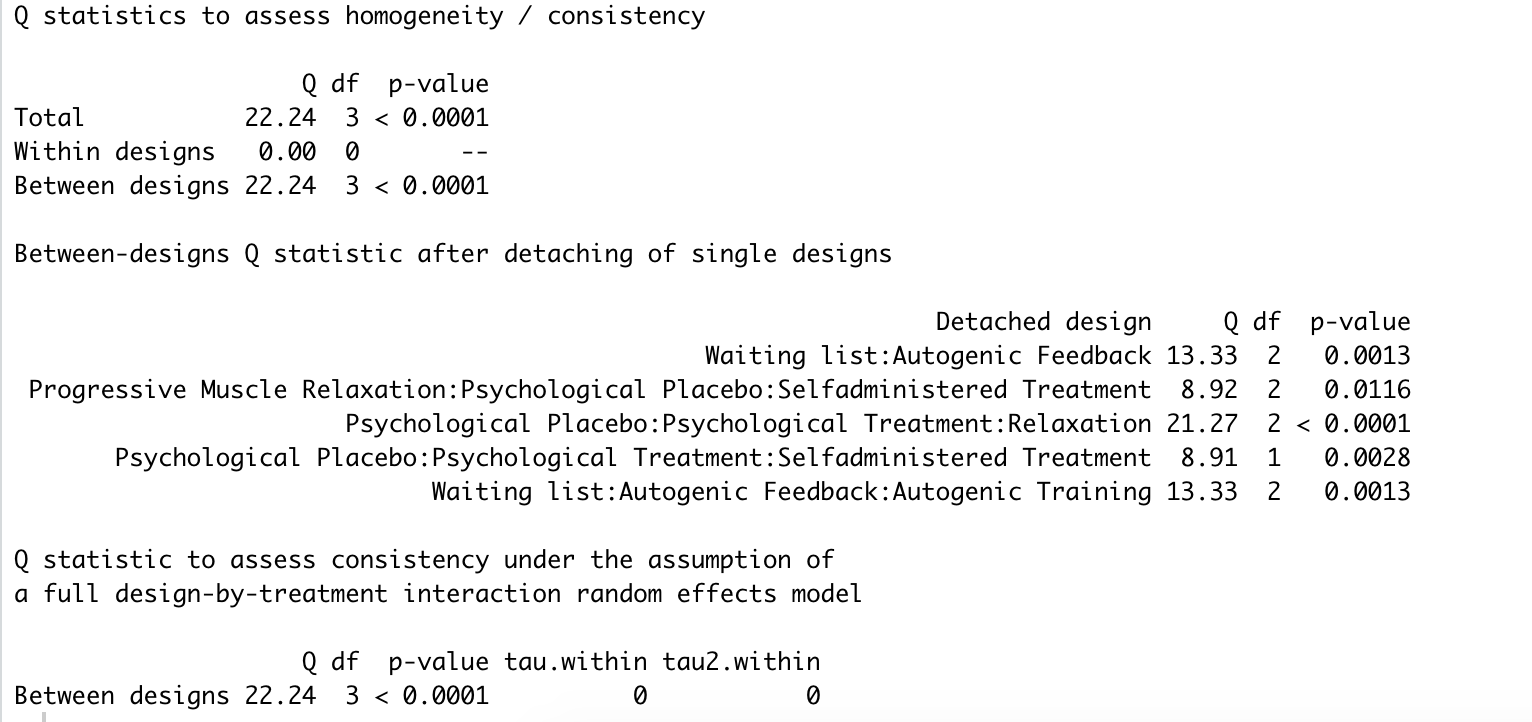
**

**Long-term efficacy – Local approach**

**
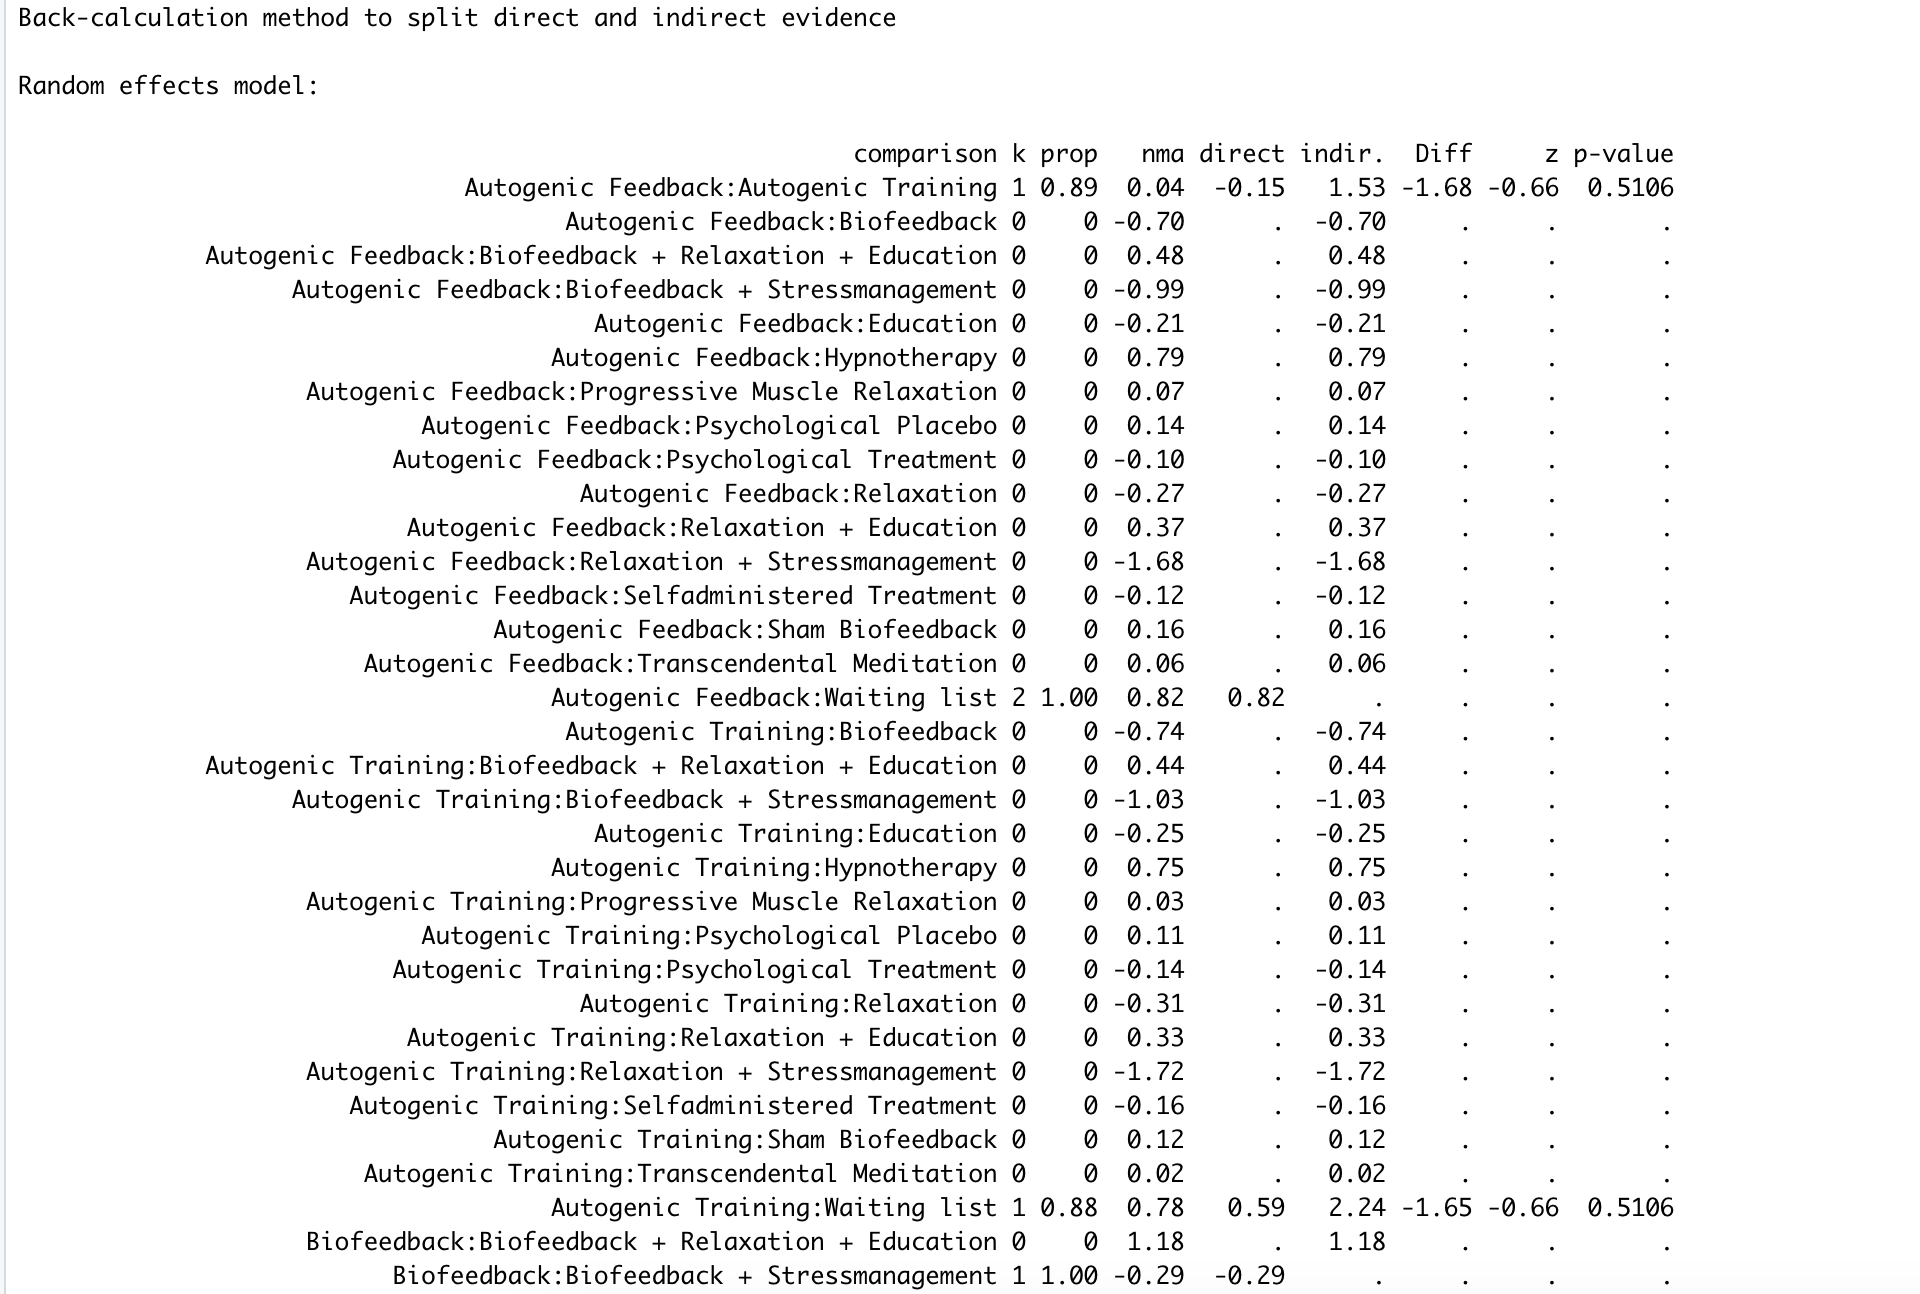

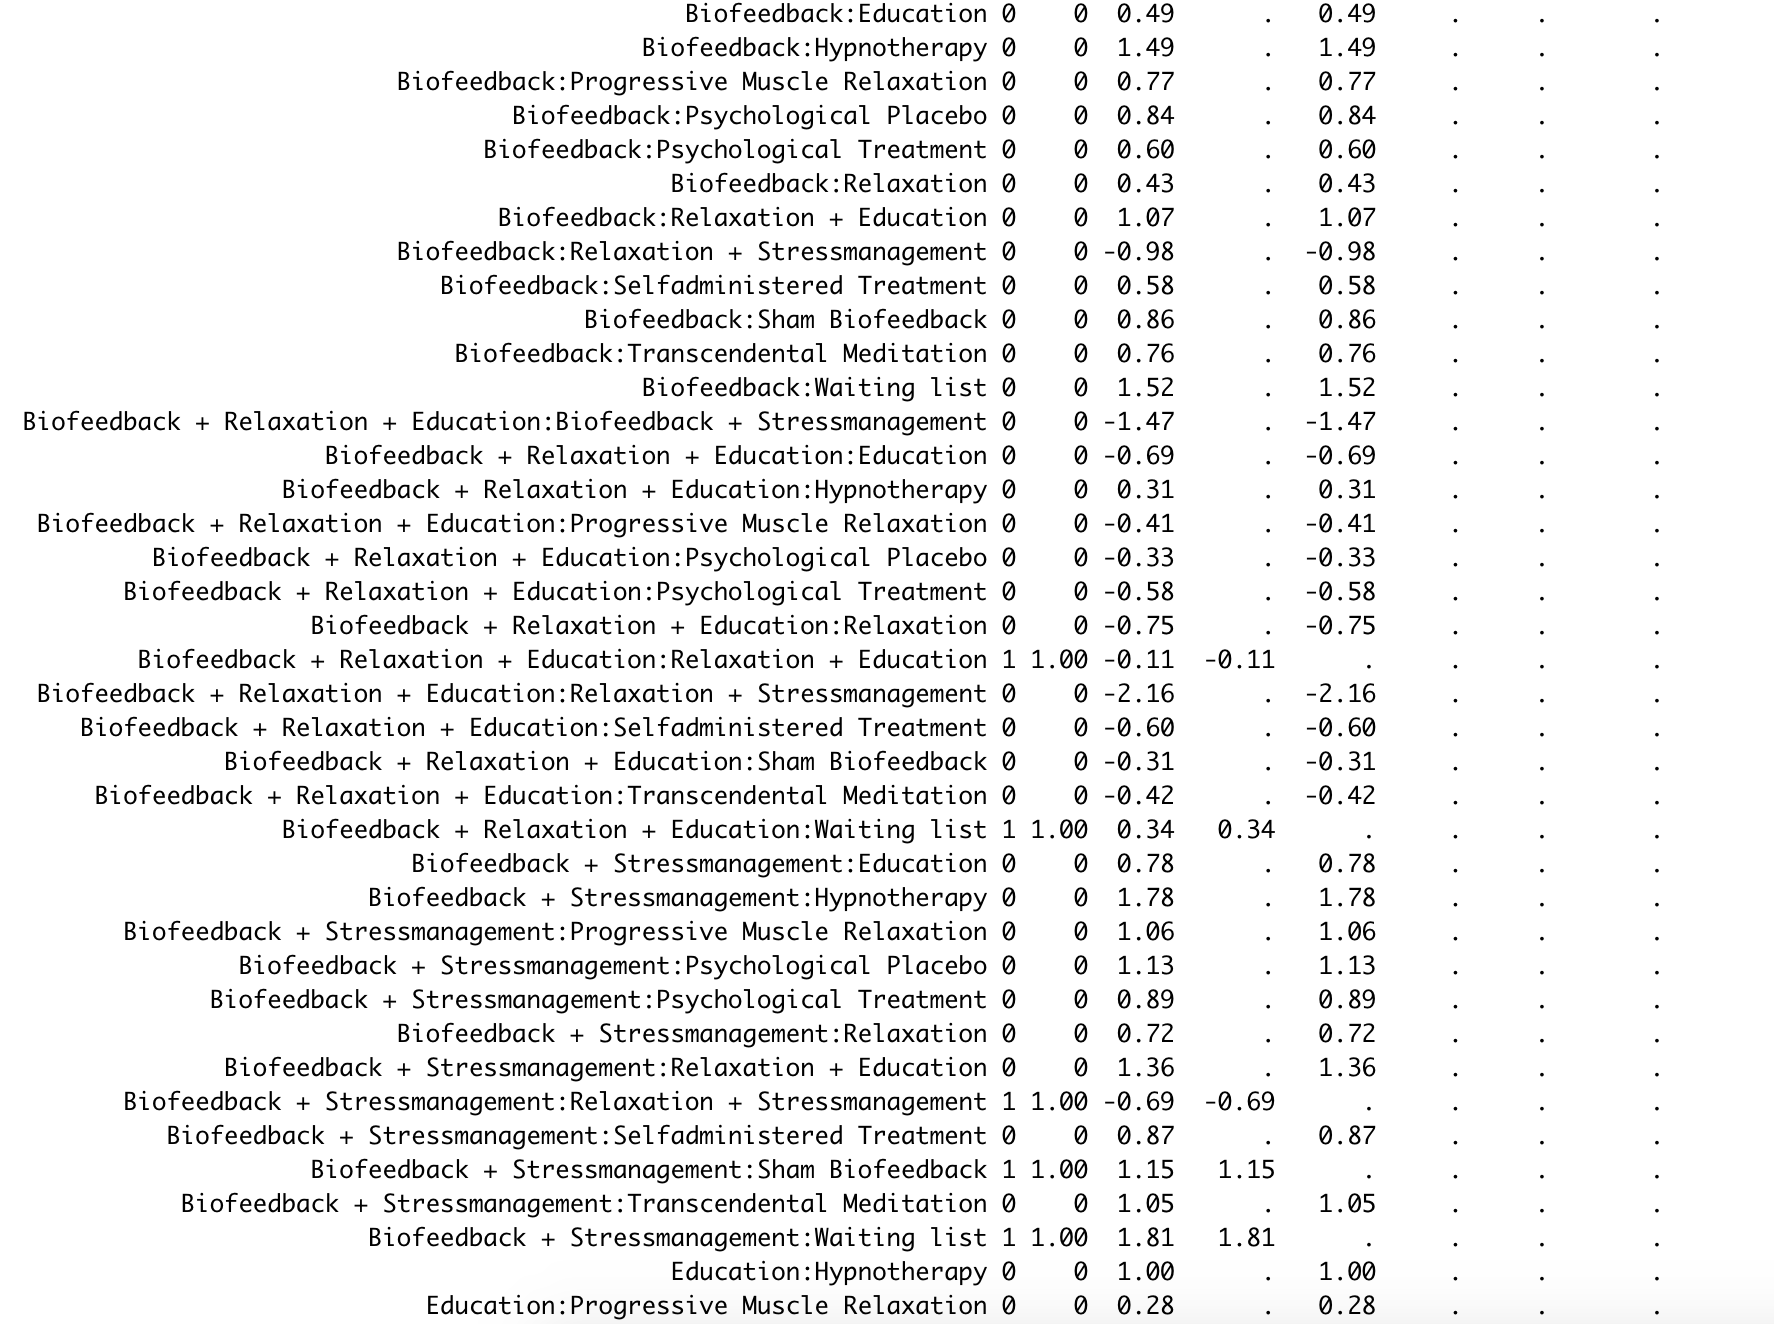

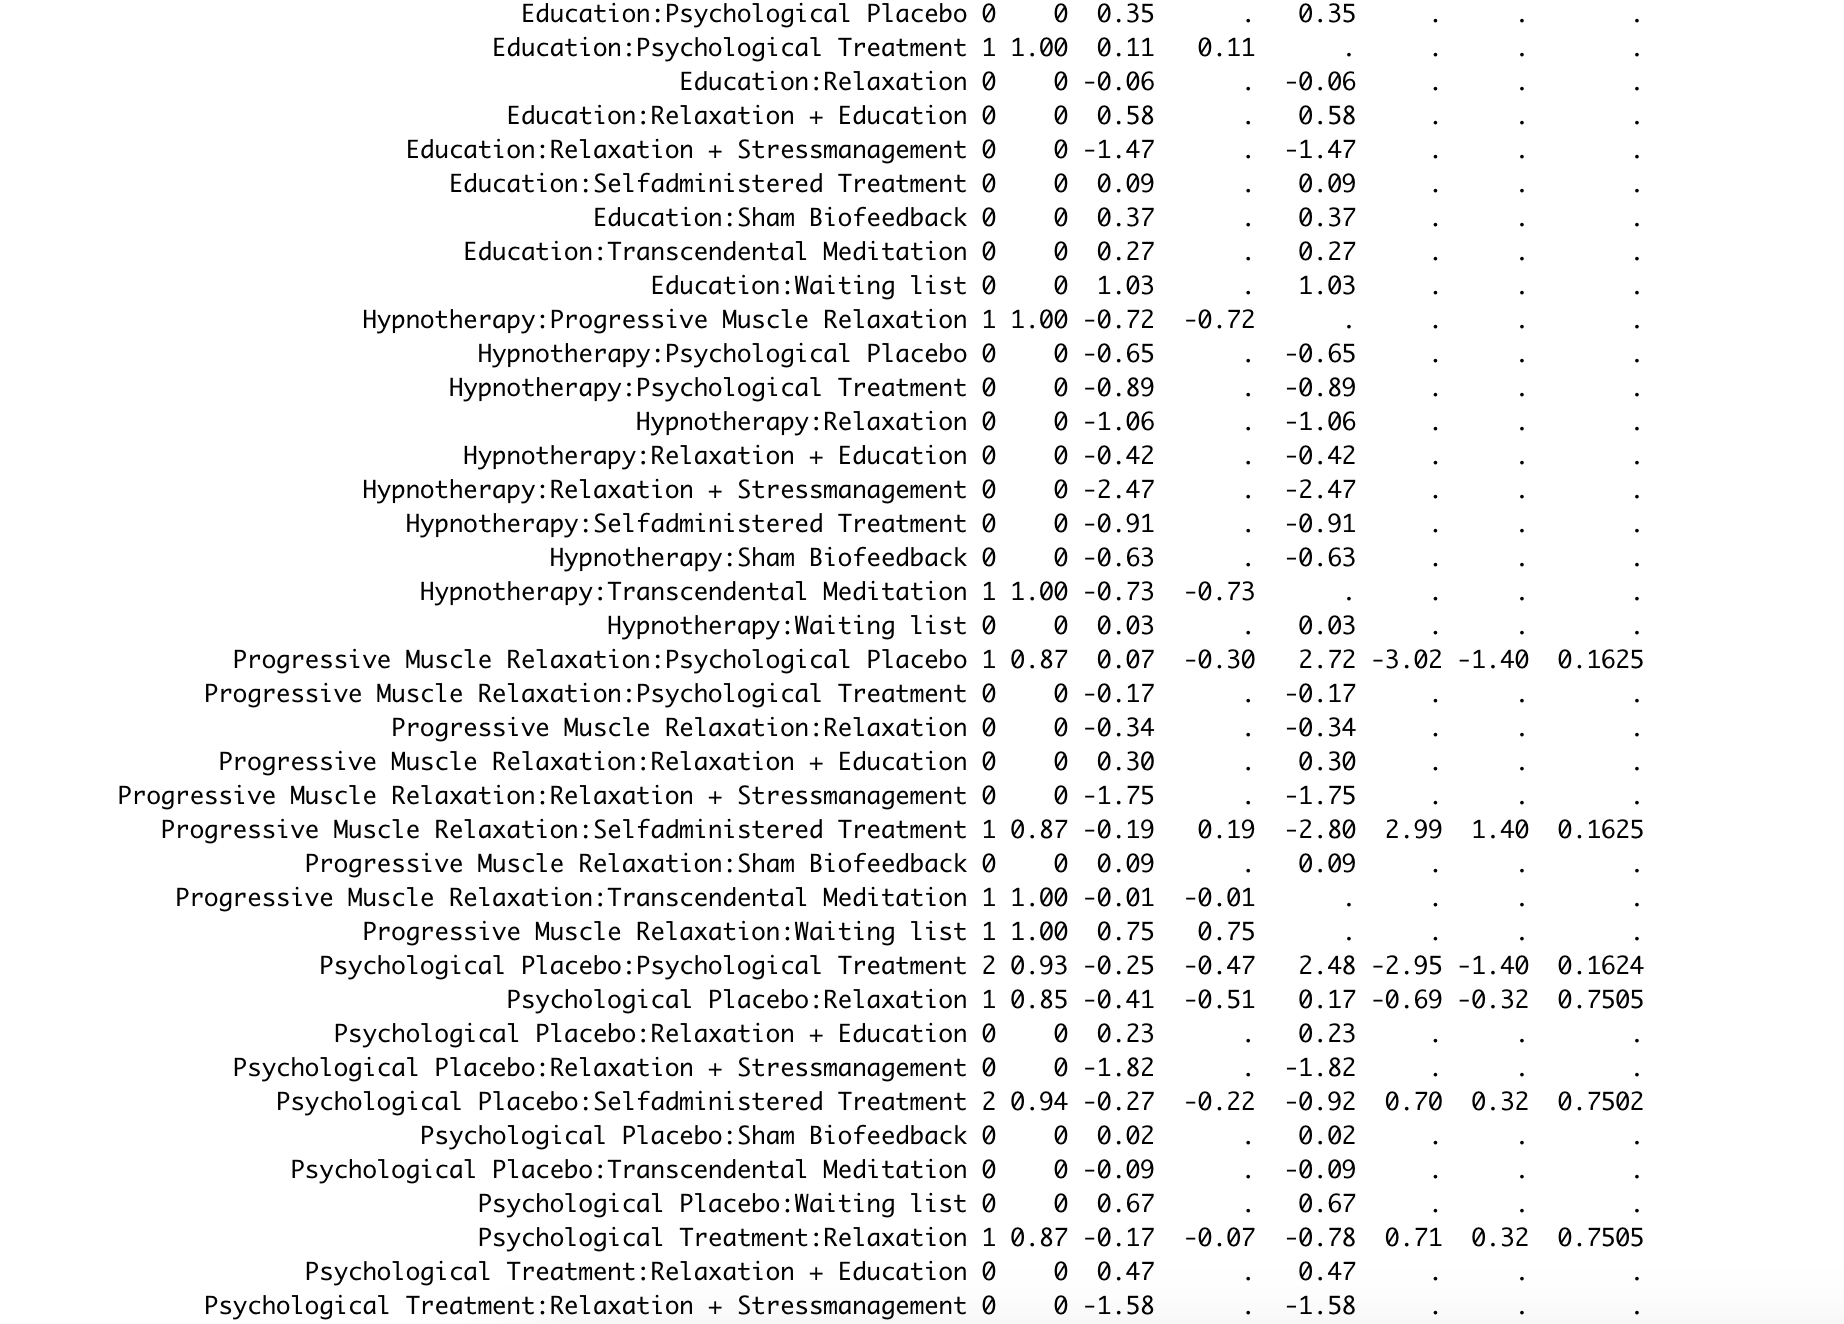

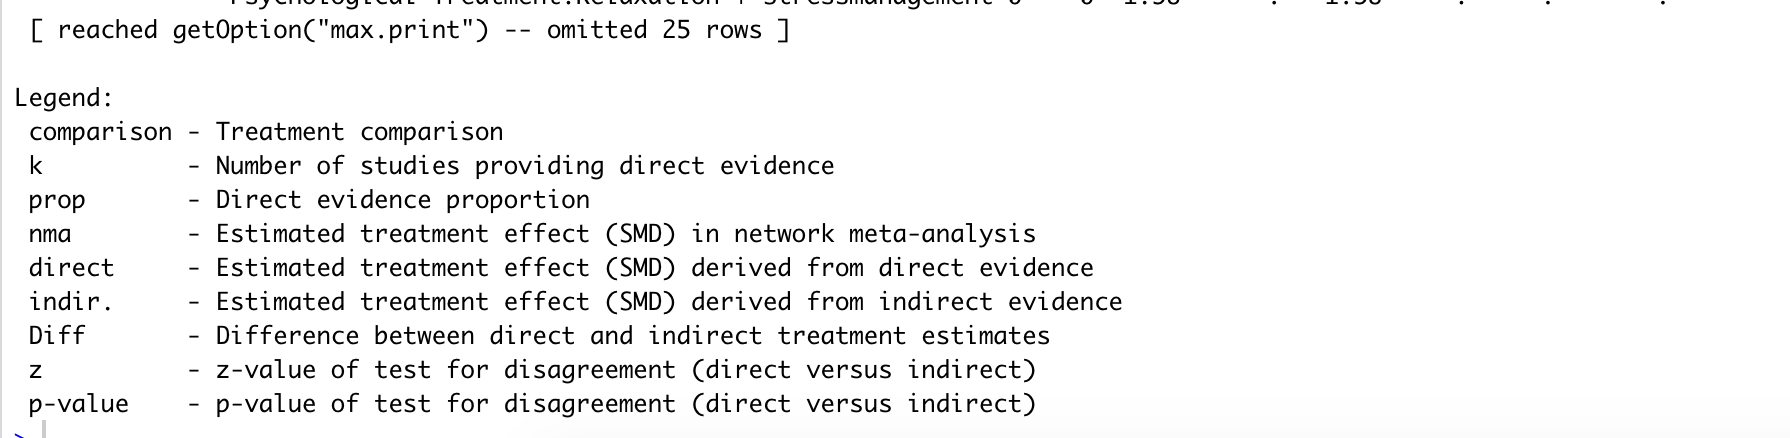
**

**Long-term efficacy – Global approach**

**
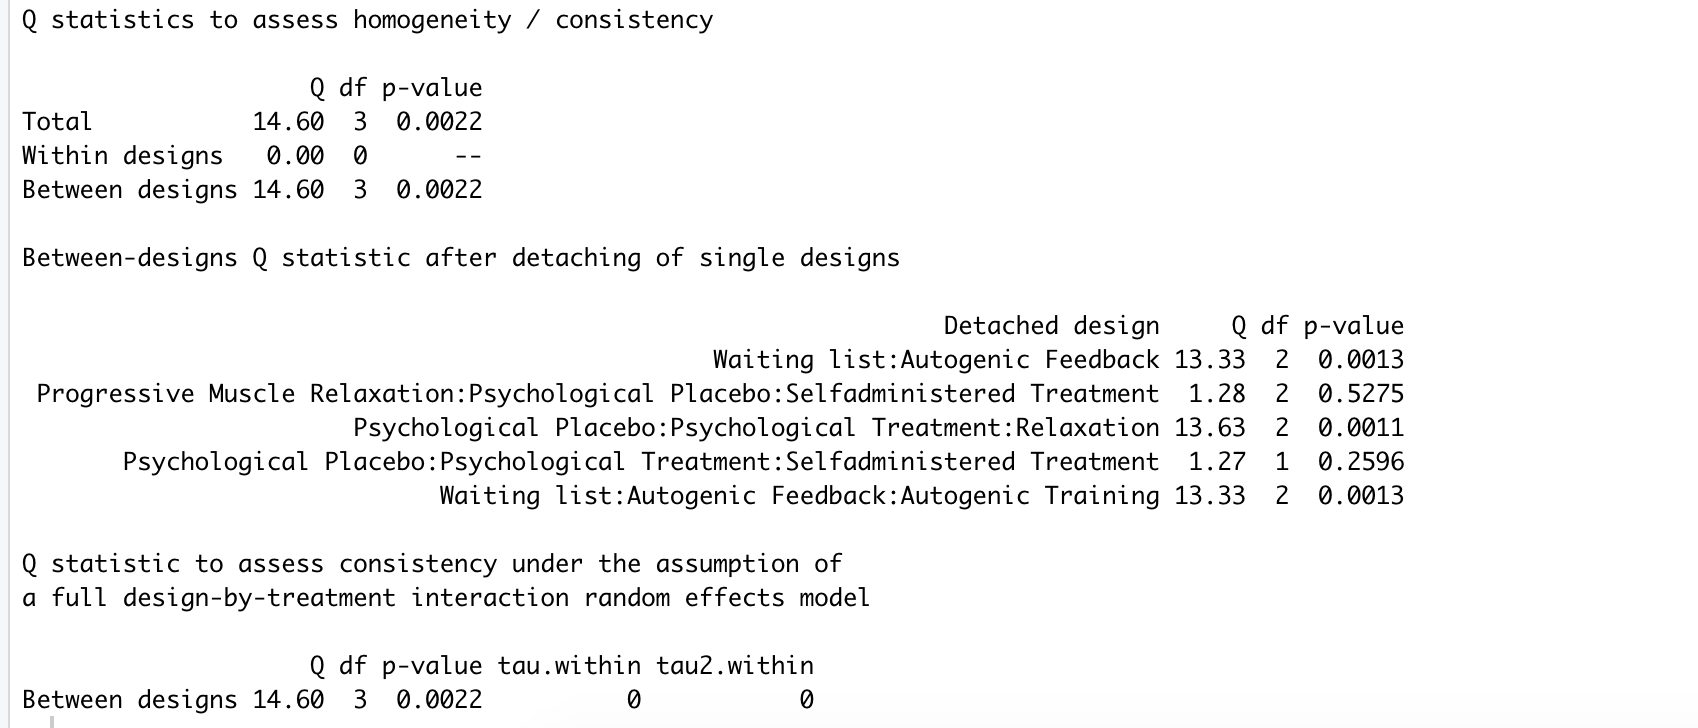
**

**eAppendix 6. Details on Publication Bias**

So far, there is a lack of a concrete methodology of assessing across-studies bias (publication bias) for a network meta-analytic approach. Therefore, a comparison-adjusted funnel plot with accompanying Egger test for asymmetry was conducted 9. See eFigures 2 and 3.

**eAppendix 7. Details on Prediction Intervals**

Prediction intervals are useful for the clinical interpretation of the *heterogeneity* by providing a region within which a given percentage of true treatment effects are expected, were calculated 10. The 95% prediction interval estimates where the true effects are to be expected for 95% of similar (exchangeable) studies that might be conducted in the future. Reporting a prediction interval in addition to the effect sizes and confidence intervals can help estimate the range of true effects that can be expected in future settings.

**Short-term efficacy**

**
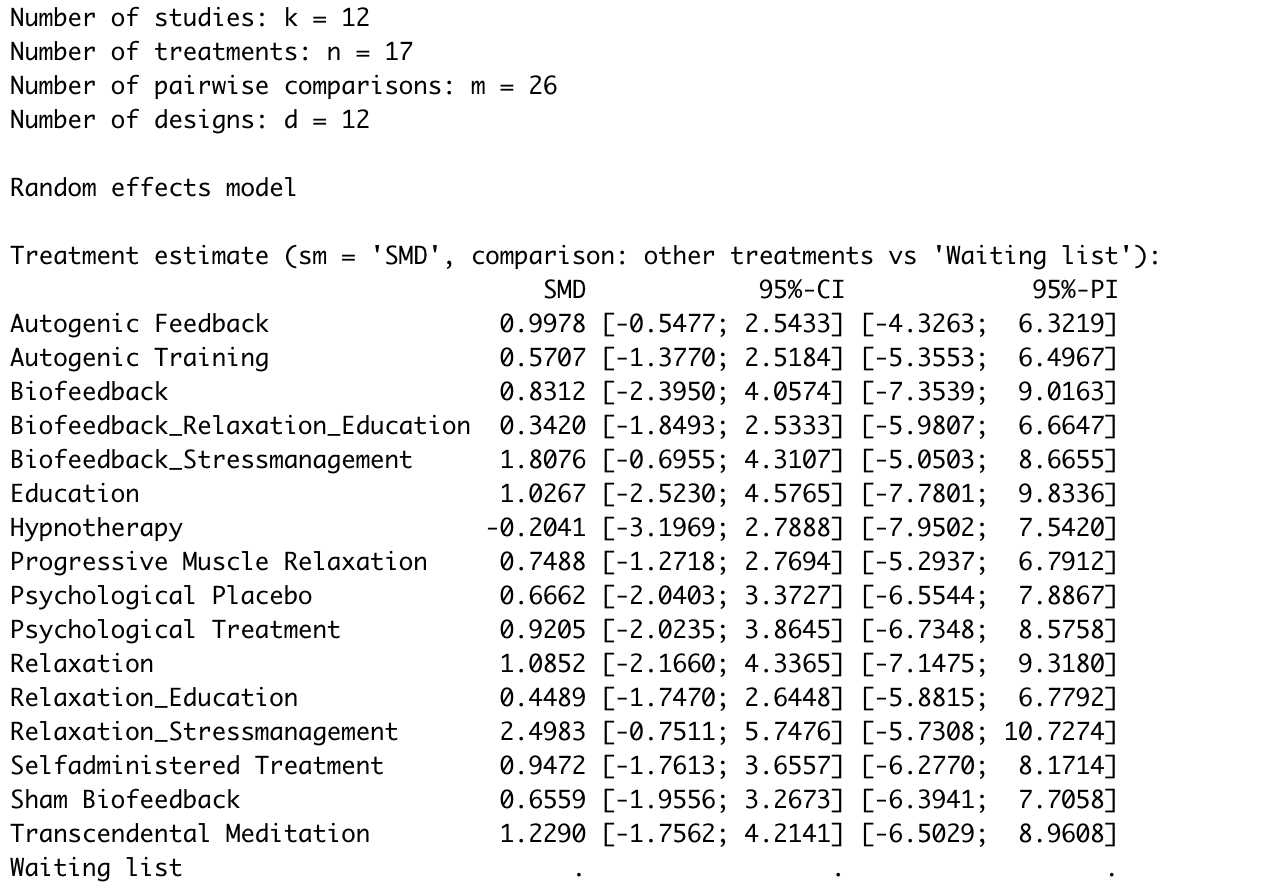
**

**Long-term efficacy**

**
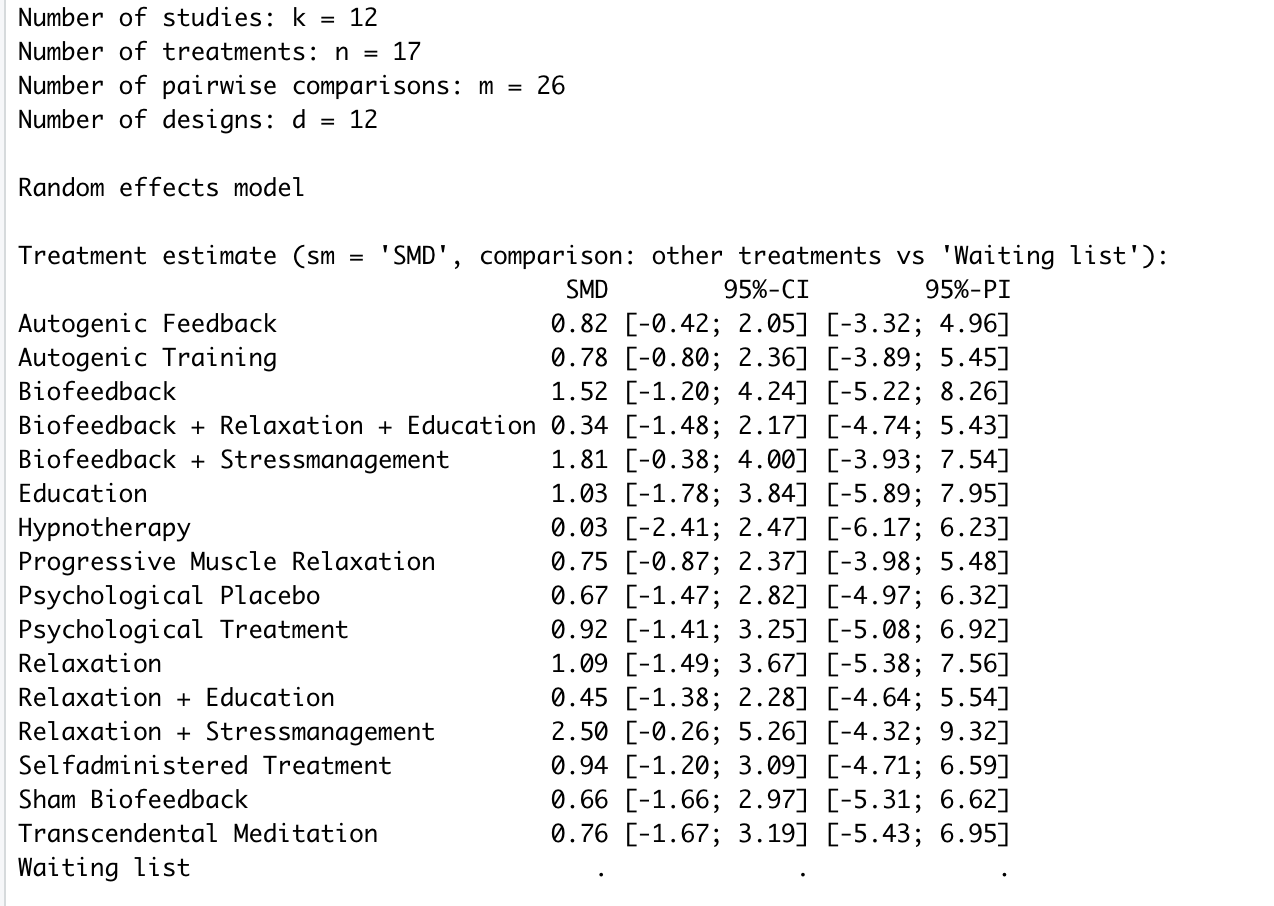
**

**eAppendix 8. PRISMA Checklist**

| **Section/Topic** | **Item #** | **Checklist Item** | **Reported on Page #** |
| --- | --- | --- | --- |
| **TITLE** |  |  |  |
| Title | 1 | Identify the report as a systematic review *incorporating a network meta-analysis (or related form of meta-analysis).* | p.1 |
|  |  |  |  |
| **ABSTRACT** |  |  |  |
| Structured summary | 2 | Provide a structured summary including, as applicable:  **Background:** main objectives  **Methods:** data sources; study eligibility criteria, participants, and interventions; study appraisal; and *synthesis methods, such as network meta-analysis.*  **Results:** number of studies and participants identified; summary estimates with corresponding confidence/credible intervals; *treatment rankings may also be discussed. Authors may choose to summarize pairwise comparisons against a chosen treatment included in their analyses for brevity.*  **Discussion/Conclusions:** limitations; conclusions and implications of findings.  **Other:** primary source of funding; systematic review registration number with registry name. | p.3 |
|  |  |  |  |
| **INTRODUCTION** |  |  |  |
| Rationale | 3 | Describe the rationale for the review in the context of what is already known*, including mention of why a network meta-analysis has been conducted.* | p.4-6 |
| Objectives | 4 | Provide an explicit statement of questions being addressed, with reference to participants, interventions, comparisons, outcomes, and study design (PICOS). | p.6 |
|  |  |  |  |
| **METHODS** |  |  |  |
| Protocol and registration | 5 | Indicate whether a review protocol exists and if and where it can be accessed (e.g., Web address); and, if available, provide registration information, including registration number. | p. 7 |
| Eligibility criteria | 6 | Specify study characteristics (e.g., PICOS, length of follow-up) and report characteristics (e.g., years considered, language, publication status) used as criteria for eligibility, giving rationale. *Clearly describe eligible treatments included in the treatment network, and note whether any have been clustered or merged into the same node (with justification).* | p.7 |
| Information sources | 7 | Describe all information sources (e.g., databases with dates of coverage, contact with study authors to identify additional studies) in the search and date last searched. | p.7 |
| Search | 8 | Present full electronic search strategy for at least one database, including any limits used, such that it could be repeated. | p.7 eAppendix 1 |
| Study selection | 9 | State the process for selecting studies (i.e., screening, eligibility, included in systematic review, and, if applicable, included in the meta-analysis). | p.7 |
| Data collection process | 10 | Describe method of data extraction from reports (e.g., piloted forms, independently, in duplicate) and any processes for obtaining and confirming data from investigators. | p.8 |
| Data items | 11 | List and define all variables for which data were sought (e.g., PICOS, funding sources) and any assumptions and simplifications made. | p.8-9 |
| **Geometry of the network** | **S1** | Describe methods used to explore the geometry of the treatment network under study and potential biases related to it. This should include how the evidence base has been graphically summarized for presentation, and what characteristics were compiled and used to describe the evidence base to readers. | p.9-11 |
| Risk of bias within individual studies | 12 | Describe methods used for assessing risk of bias of individual studies (including specification of whether this was done at the study or outcome level), and how this information is to be used in any data synthesis. | p.9 |
| Summary measures | 13 | State the principal summary measures (e.g., risk ratio, difference in means). *Also describe the use of additional summary measures assessed, such as treatment rankings and surface under the cumulative ranking curve (SUCRA) values, as well as modified approaches used to present summary findings from meta-analyses.* | p.9 |
| Planned methods of analysis | 14 | Describe the methods of handling data and combining results of studies for each network meta-analysis. This should include, but not be limited to:   - *Handling of multi-arm trials;* - *Selection of variance structure;* - *Selection of prior distributions in Bayesian analyses; and* - *Assessment of model fit.* | p.9-11 |
| **Assessment of Inconsistency** | **S2** | Describe the statistical methods used to evaluate the agreement of direct and indirect evidence in the treatment network(s) studied. Describe efforts taken to address its presence when found. | p.10-11 |
| Risk of bias across studies | 15 | Specify any assessment of risk of bias that may affect the cumulative evidence (e.g., publication bias, selective reporting within studies). | p.9-11 |
| Additional analyses | 16 | Describe methods of additional analyses if done, indicating which were pre-specified. This may include, but not be limited to, the following:   - Sensitivity or subgroup analyses; - Meta-regression analyses; - *Alternative formulations of the treatment network; and* - *Use of alternative prior distributions for Bayesian analyses (if applicable).* | p.10-11 |
| **RESULTS†** |  |  |  |
| Study selection | 17 | Give numbers of studies screened, assessed for eligibility, and included in the review, with reasons for exclusions at each stage, ideally with a flow diagram. | p.12 eFigure 1 in the Supplement |
| **Presentation of network structure** | **S3** | Provide a network graph of the included studies to enable visualization of the geometry of the treatment network. | Figures 1A, 1B, 1C, 1D |
| **Summary of network geometry** | **S4** | Provide a brief overview of characteristics of the treatment network. This may include commentary on the abundance of trials and randomized patients for the different interventions and pairwise comparisons in the network, gaps of evidence in the treatment network, and potential biases reflected by the network structure. | p. 12  eTable 1 in the Supplement |
| Study characteristics | 18 | For each study, present characteristics for which data were extracted (e.g., study size, PICOS, follow-up period) and provide the citations. | Table 1 |
| Risk of bias within studies | 19 | Present data on risk of bias of each study and, if available, any outcome level assessment. | Table 1 |
| Results of individual studies | 20 | For all outcomes considered (benefits or harms), present, for each study: 1) simple summary data for each intervention group, and 2) effect estimates and confidence intervals. *Modified approaches may be needed to deal with information from larger networks.* | Figures 2A, 2B, 2C, 2D |
| Synthesis of results | 21 | Present results of each meta-analysis done, including confidence/credible intervals. *In larger networks, authors may focus on comparisons versus a particular comparator (e.g. placebo or standard care), with full findings presented in an appendix. League tables and forest plots may be considered to summarize pairwise comparisons.* If additional summary measures were explored (such as treatment rankings), these should also be presented. | eTable 3A, 3B, 3C, 3D |
| **Exploration for inconsistency** | **S5** | Describe results from investigations of inconsistency. This may include such information as measures of model fit to compare consistency and inconsistency models, *P* values from statistical tests, or summary of inconsistency estimates from different parts of the treatment network. | eAppendix 4 |
| Risk of bias across studies | 22 | Present results of any assessment of risk of bias across studies for the evidence base being studied. | eAppendix 3 |
| Results of additional analyses | 23 | Give results of additional analyses, if done (e.g., sensitivity or subgroup analyses, meta-regression analyses*, alternative network geometries studied, alternative choice of prior distributions for Bayesian analyses,* and so forth). | eAppendix 6 |
|  |  |  |  |
| **DISCUSSION** |  |  |  |
| Summary of evidence | 24 | Summarize the main findings, including the strength of evidence for each main outcome; consider their relevance to key groups (e.g., healthcare providers, users, and policy-makers). | p.17 |
| Limitations | 25 | Discuss limitations at study and outcome level (e.g., risk of bias), and at review level (e.g., incomplete retrieval of identified research, reporting bias). *Comment on the validity of the assumptions, such as transitivity and consistency. Comment on any concerns regarding network geometry (e.g., avoidance of certain comparisons).* | p.22 |
| Conclusions | 26 | Provide a general interpretation of the results in the context of other evidence, and implications for future research. | p. 24 |
|  |  |  |  |
| **FUNDING** |  |  |  |
| Funding | 27 | Describe sources of funding for the systematic review and other support (e.g., supply of data); role of funders for the systematic review. This should also include information regarding whether funding has been received from manufacturers of treatments in the network and/or whether some of the authors are content experts with professional conflicts of interest that could affect use of treatments in the network. | p.1 |

PICOS = population, intervention, comparators, outcomes, study design.

* Text in italics indicate wording specific to reporting of network meta-analyses that has been added to guidance from the PRISMA statement.

† Authors may wish to plan for use of appendices to present all relevant information in full detail for items in this section.

**eFigure 1. Flow Chart**


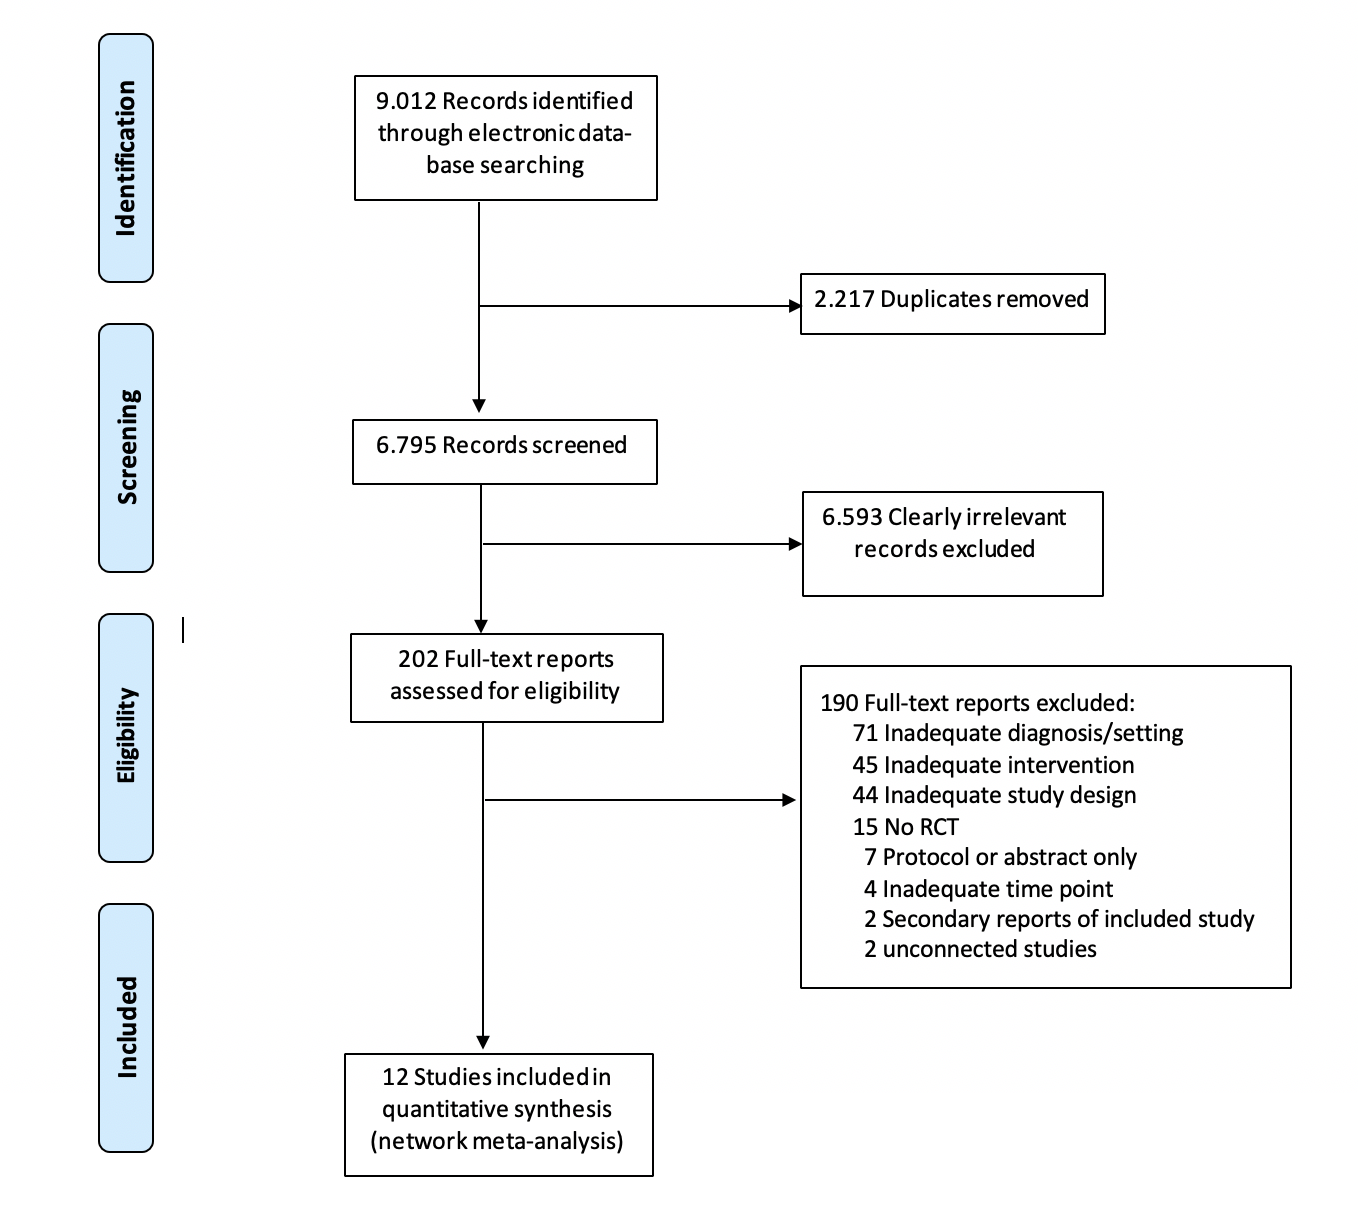


Two studies had to be excluded from our network meta-analysis, as they were not connected with the rest of the network. These studies investigated the effectiveness of acupuncture compared to placebo acupuncture 11 and butterbur root extract compared to music therapy 12. An unconnected network does not provide estimation of relative effects between the unconnected interventions 13.

**eFigure 2. Funnel plot with accompanying Egger test: Short-term efficacy**

**
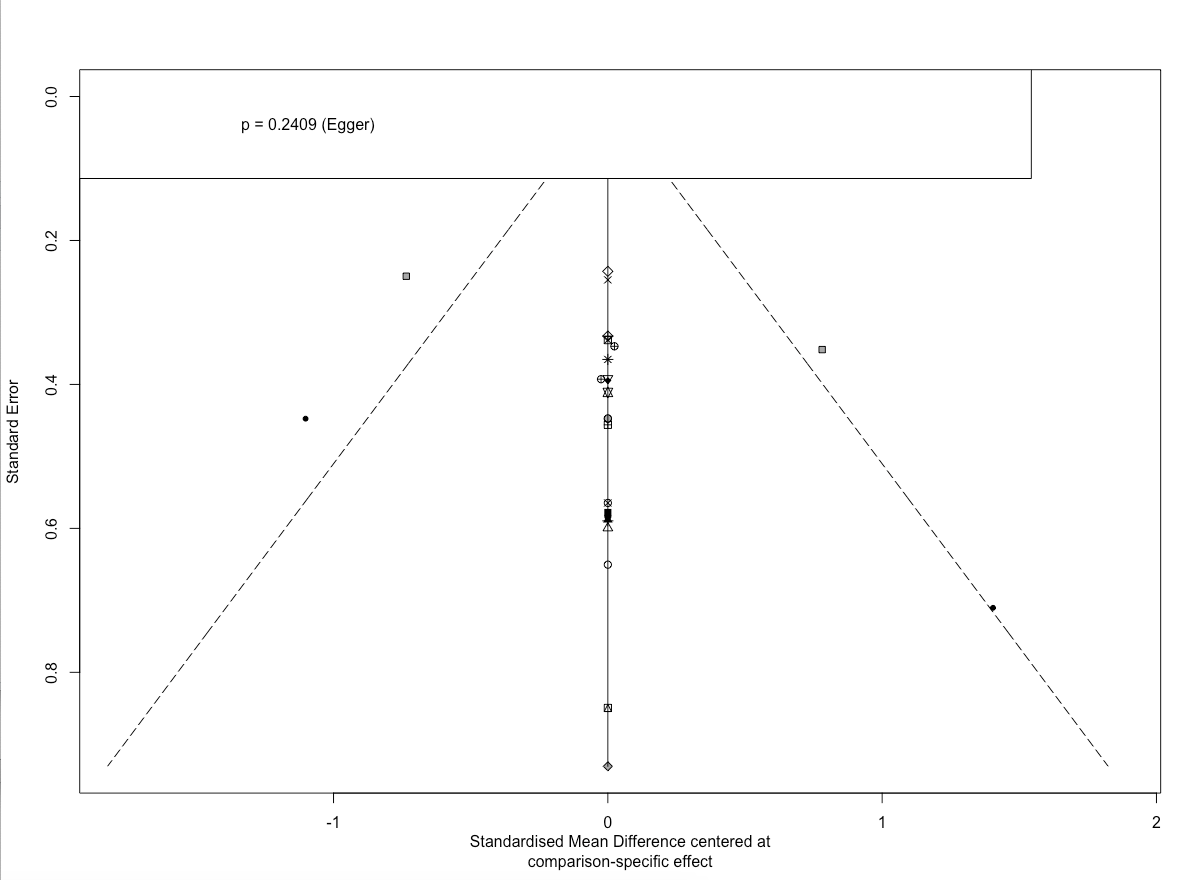
**

**eFigure 3. Funnel plot with accompanying Egger test: Long-term efficacy**

**
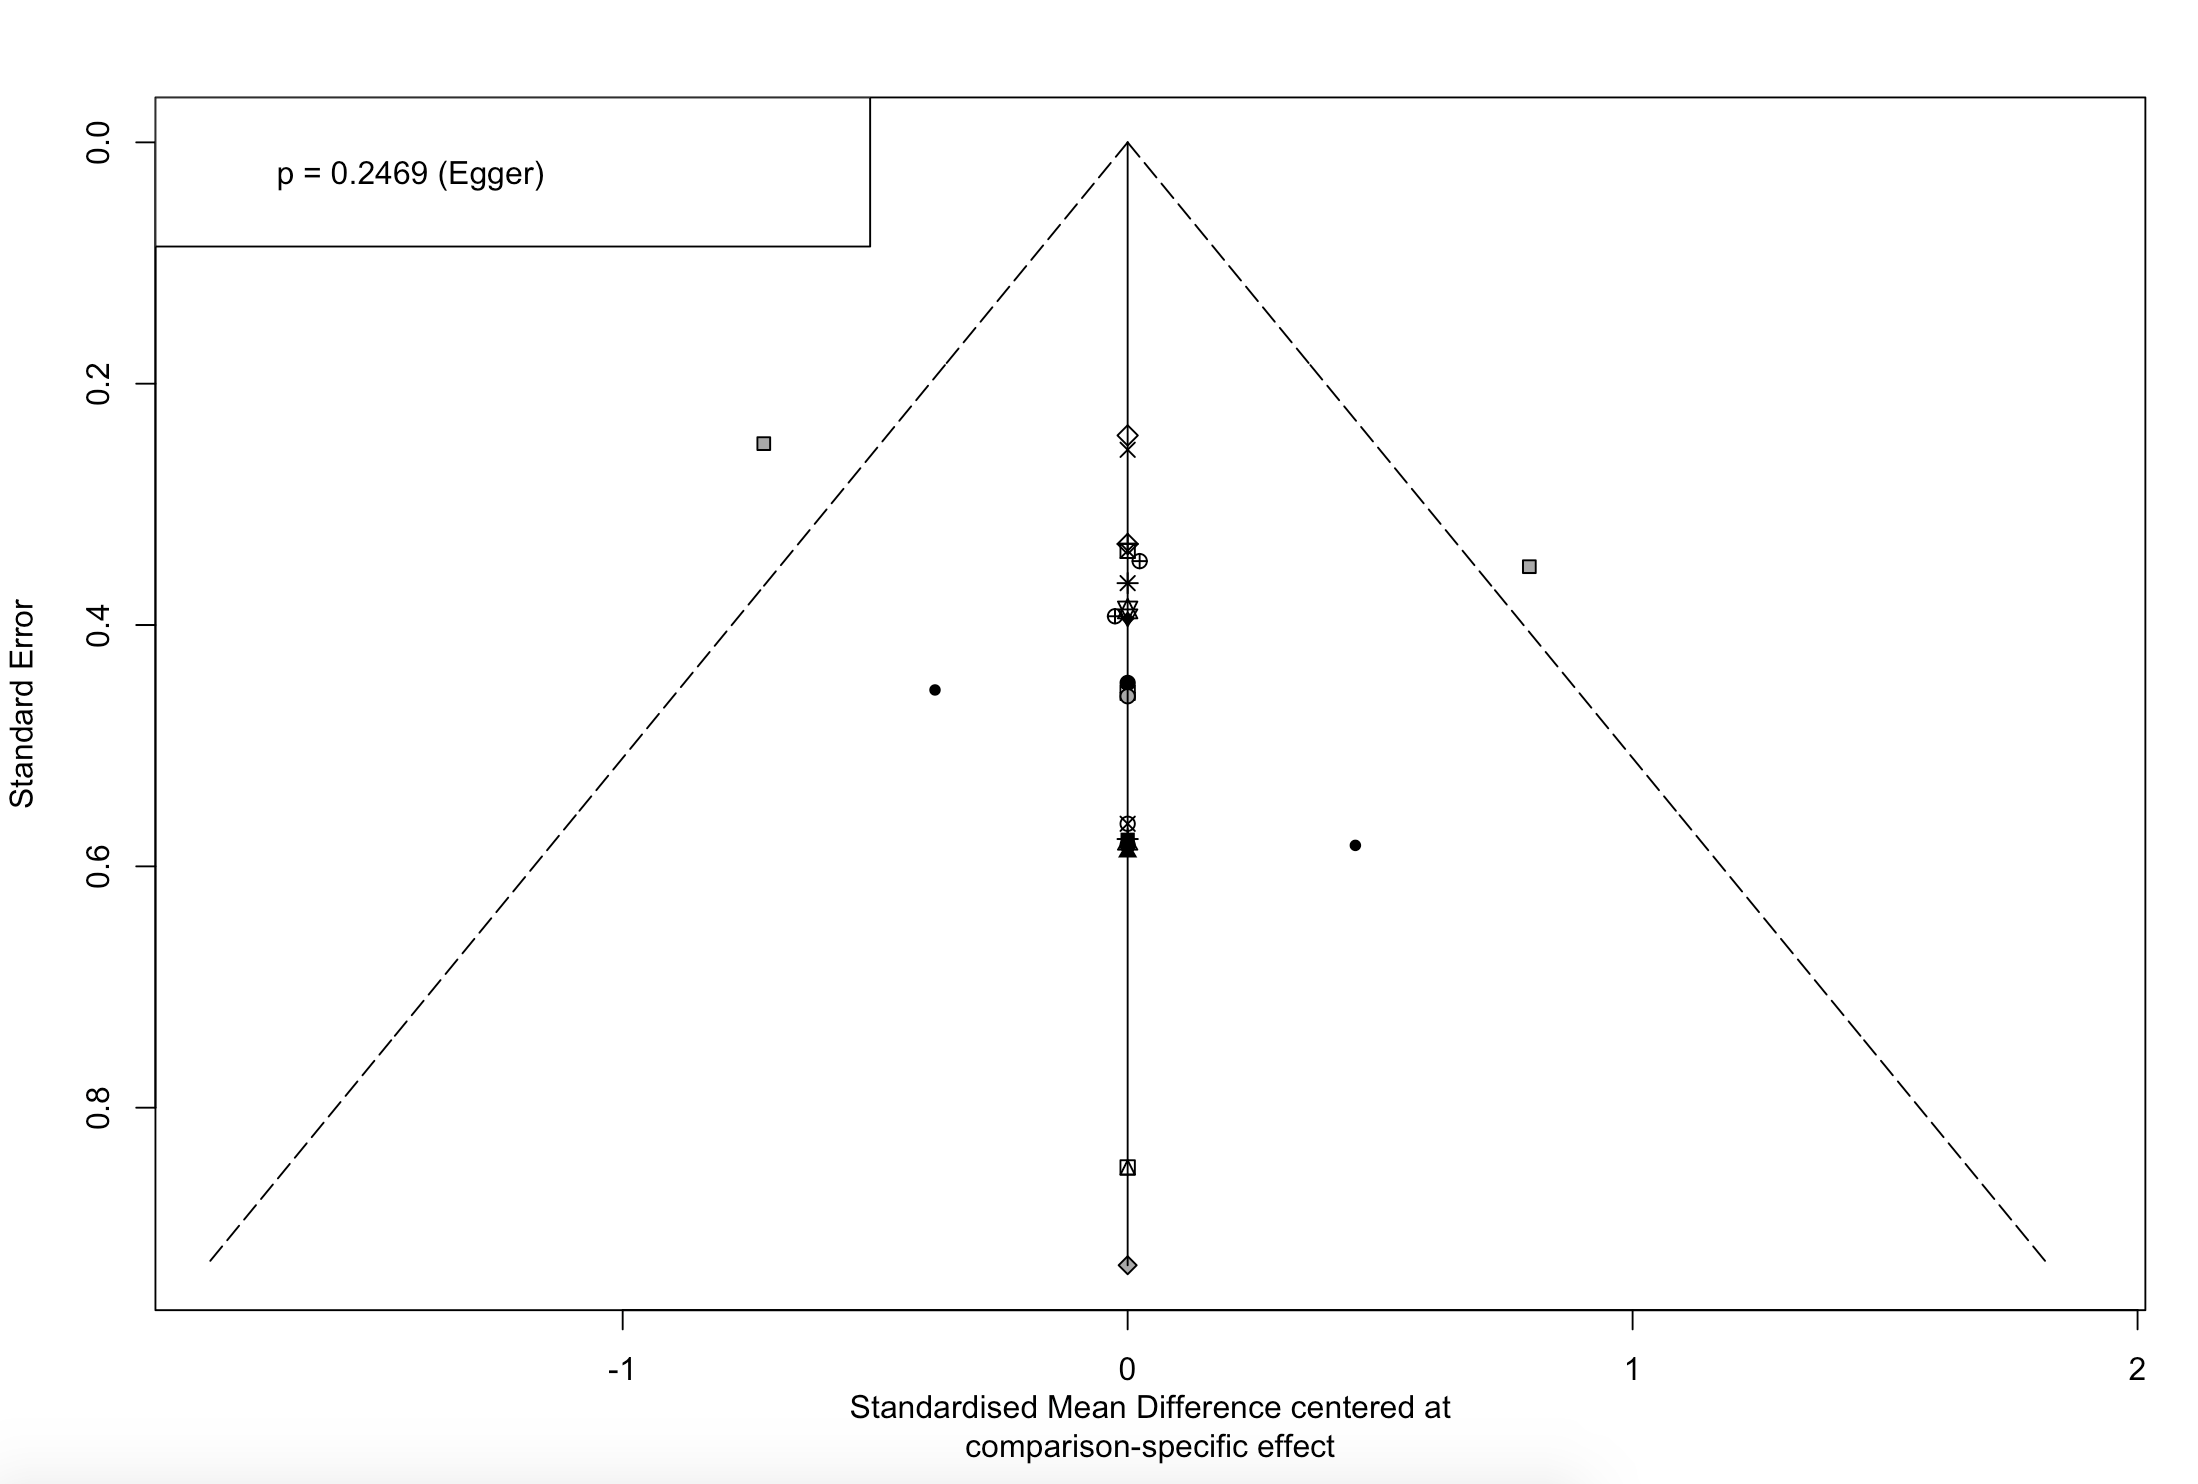
**

eTable 1. Detailed description of interventions in included studies

| **Study ID** | **Intervention 1** | **Intervention 2** | **Intervention 3** | **Control Condition** |
| --- | --- | --- | --- | --- |
| Allen 1998 | Biofeedback training in clinic using a temperature thermistor and a dual channel, independent monitor. Small, alcohol-in-glass thermometers used for home practices along with a biofeedback practice log | Same biofeedback intervention plus pain behavior management guidelines implemented by child’s parents: parents were asked to encourage adaptive coping, minimize responses to pain behaviors, and insist upon active participation in daily activities | - | - |
| Fentress 1986 | Frontal EMG biofeedback, meditative relaxation training to elicit the relaxation response, and pain behavior management (based on the model of chronic pain behavior developed by Fordyce 14 | Progressive muscle relaxation, meditative relaxation, both trained with a therapist and practiced at home twice daily, and the same pain behavior management as intervention 1 | - | Waiting list: collected information on headache occurrence for a period equal in length to the baseline and treatment periods |
| Fichtel 2001 | Progressive relaxation, differential relaxation, short relaxation techniques, practiced in both small group and individualized formats | - | - | Waiting list |
| Jong 2019 | Transcendental meditation taught in a standardized course program as described by Tanner et al. 15. Individual sessions and instructions to practice twice a day over a period of 3 months | Hypnotherapy protocol, adapted of the Dutch hypnosis protocol for pediatric abdominal pain 16. Instructions to practice self-hypnosis or listed to recorded sessions at home at least once a day | - | Progressive muscle relaxation (active control): up to 6 sessions within the 3-month intervention period and once a day home exercises |
| Labbé 1984 | Biofeedback using a temperature thermistor plus autogenic instructions. Auditory feedback provided by audio oscillator and amplifier. Temperature bands for home practice | - | - | Waiting list: kept headache records during the treatment phase for the experimental group and 1 month after |

eTable 1. Detailed description of interventions in included studies. Continued.

| **Study ID** | **Intervention 1** | **Intervention 2** | **Intervention 3** | **Control Condition** |
| --- | --- | --- | --- | --- |
| Labbé 1995 | Biofeedback of fingertip temperature using a single thermal sensor. Same autogenic instructions as in Labbé 1984 | Biofeedback of fingertip temperature using a single thermal sensor | - | Waiting list: kept headache records during the treatment phase for the experimental group |
| McGrath 1988 | Relaxation training, using a modification of the method of Cautela & Groden 17. Sequential relaxation and differential relaxation, instructed to practice daily | Psychological placebo (attention-control): six weekly sessions with a therapist, children were taught to recognize and label their emotions, relate them to life situation, and discuss feelings daily with a fried of parent | - | Own best efforts (control for therapist contact in placebo group): a single session to discuss the use of headache diary to determine triggers for migraine attacks, and to suggest strategies to reduce the impact of possible triggers |
| McGrath 1992 | Self-administered program: treatment manual and cassette tapes 18. Initial session and weekly contact by telephone, homework assignments received by mail | Clinic group: program identical to the self-administered group, but individual sessions instead of weekly telephone calls. Delivered by a trained therapist. | - | Psychological placebo: List of common triggers of migraine, initial session in which children were asked to become aware and avoid triggers, and to use a brainstorming technique. Weekly phone calls to monitor progress. |
| Oelkers 2008* | Butterbur root extract: Petadolex, one capsule twice daily (50mg/d) for children aged 8-9 years, two capsules twice daily (100mg/d) for children aged 10-12 years. Dose increment possible after 8 weeks if headache relief was insufficient | Music therapy treatment, consisted of music-aided relaxation training, body awareness techniques, and conflict training in musical role play following the Heidelberg model 19 as adapted by Nickel 20 | - | Placebo capsules dosed analogously to butterbur root extract |
| Pintov 1997* | True acupuncture according to the principles of traditional Chinese medicine with the needle inserted subdermally | - | - | Placebo acupuncture using a needle the same size as in true acupuncture, but inserted only into the stratum corneum |

eTable 1. Detailed description of interventions in included studies. Continued.

| **Study ID** | **Intervention 1** | **Intervention 2** | **Intervention 3** | **Control Condition** |
| --- | --- | --- | --- | --- |
| Rapoff 2014 | Headstrong CD-ROM in addition to treatment as usual: program containing lessons on how to use cognitive-behavioral treatments to self-manage headaches, relaxation methods, problem-solving, stress management, pain behavior and parental response. Accompanied by workbook and a manual for parents. | - | - | Treatment as usual: recommendations and prescriptions of their treating neurologist plus educational CD-ROM with information about headaches. Manual for parents containing directions on how to use the CD-ROM program and their role in it |
| Richter 1985 | Relaxation training, following Cautela & Groden 17: progressive muscle relaxation, differential relaxation, self-cueing, and mini relaxation. Children were instructed to practice daily and use relaxation skills when stress levels rose or at the onset of a headache | Cognitive coping based on Holroyd & Andrasik21 and Bakal 22, with an emphasizes on altering maladaptive thought processes. Elements of cognitive restructuring, cognitive control of pain, fantasy, problem-solving, and stress-inoculation training | - | Placebo treatment for attention-control: stress reduction training with teaching on how to recognize and label emotions, relate them to the situation and discuss feelings daily with a friend or parent |
| Santory 1998 | Metoprolol orally as a single dose of 50mg for children with a body weight under 40kg and a dose of 100mg to those above° | Stress management training based on McGrath et al. Training of stress management skills, imagery, and distraction | Cephalic vasomotor feedback with a photoplethysmograph placed on the temporal artery. Process aided by means of imagery | - |
| Scharff 2002 | Handwarming biofeedback, imagery training of warm places and vasolidation, cognitive-behavioral stress management training, progressive muscle relaxation and deep breathing techniques | Handcooling biofeedback, imagery of cold places and peripheral vasoconstriction, general discussion regarding children’s lives and headaches | - | Waiting list: kept a headache diary |

Note.

*This study was unconnected to the network and therefore not included.

° This study arm was not included in the network meta-analysis.

eTable 2. Raw data of included studies

|  | |  |  | | **Dichotomous outcome** | | | | | | | | **Continuous outcome** | | | | | | |  |
| --- | --- | --- | --- | --- | --- | --- | --- | --- | --- | --- | --- | --- | --- | --- | --- | --- | --- | --- | --- | --- |
| **Study ID** | | **Intervention** | **Primary efficacy outcome for analyses** | | **Responders Post** | | **Responders FU 1** | | **Responders FU 2** | | **Mean (SD) Baseline** | | | **Mean (SD) post** | | **Mean (SD) FU1** | | **Mean (SD)  FU 2** | |  |
| Allen 1998 | | Biofeedback  Biofeedback plus guidelines | Headache frequency | | 3  11 | | 5  11 | | 5  12 | | 4.20 (2.40)  4.10 (2.2) | | | 3.30 (2.90)  1.50 (2.30) | | 3.40 (2.90)  0.90 (1.90) | | 2.20 (1.40)  0.80 (0.90) | |  |
| Fentress 1986 | | Biofeedback, relaxation and education  Relaxation and education  Waiting list | Headache frequency | | n.r. | | 5  5  2 | | n.r. | | 2.70 (4.82)*  2.60 (4.82)*  2.30 (4.82)* | | | n.r. | | 1.00 (3.53)*  0.40 (3.53)*  2.20 (3.53)* | | n.r. | |  |
| Fichtel 2001 | | Progressive Muscle Relaxation  Waiting list | Migraine frequency | | n.r. | | 14  6 | | n.r. | | 1.85 (2.10)  1.10 (0.80) | | | n.r. | | 1.07 (1.80)  0.77 (0.70) | | n.r. | |  |
| Jong 2019 | | Hypnotherapy  Transcen-dental meditation  Progressive Muscle Relaxation | Headache frequency | | n.r. | | 0  2  1 | | n.r. | | 5.90 (3.24)  4.20 (1.72)  5.30 (3.08) | | | n.r. | | 11.14 (3.44)  4.50 (3.21)  7.33 (3.72) | | n.r. | |  |
| Labbé 1984 | | Autogenic Feedback  Waiting list | Headache frequency | | 13  1 | | 13  2 | | n.r. | | 2.59 (4.82)*  2.64 (4.82)* | | | 0.89 (3.86)*  2.68 (3.86)* | | 0.91 (3.53)*  2.57 (3.53)* | | n.r. | |  |
| **eTable 2. Raw data of included studies. Continued.** | | | | | | | | | | | | | | | | | | | | |
| Labbé 1995 | | Biofeedback and Autogenic Training  Autogenic Training  Waiting list | | Headache frequency | | 10  9  6 | | 10  10  2 | | n.r. | | 2.71 (4.82)*  3.67 (4.82)*  3.18 (4.82)* | | | 0.05 (3.86)*  0.38 (3.86)*  2.17 (3.86)* | | - 1. (3.53)*   1.00(3.53)*  0.60 (3.53)* | | n.r. | |
| McGrath 1988 | | Relaxation Training  Psychological Placebo  Best Efforts | | Headache index | | n.r. | | n.r. | | n.r. | | 11.60 (5.10)  10.40 (4.70)  9.70 (4.90) | | | n.r. | | 8.20 (9.40)  4.80 (5.10)  7.70 (9.50) | | n.r. | |
| McGrath 1992 | Psychological Treatment  Self-Administered Treatment  Psychological Placebo | | | >50% improvement in headache index | | n.r. | | 10  16  6 | | n.r. | | 166 (n.r.)  153 (n.r.)  n.r. | | | 88.0 (n.r.)  72.0 (n.r.)  n.r. | | 85.0 (n.r.)  75.0 (n.r.)  n.r. | | n.r. | |
| Rapoff 2014 | Headstrong CD-ROM  Educational CD-ROM | | | Headache frequency | | n.r. | | n.r. | | n.r. | | 41.09 (22.67)  40.67 (35.71) | | | 31.3 (25.0)  32.1 (28.6) | | 21.43 (7.14)  18.18 (14.29) | | n.r. | |
| Richter 1985 | Relaxation  Cognitive Coping  Psychological Placebo | | | Headache frequency | | n.r. | | n.r. | | n.r. | | 9.03 (8.05)  8.14 (7.82)  7.26 (6.12) | | | 5.2 (5.2)  4.5 (5.3)  6.5 (6.1) | | 2.91 (3.40)  2.5 (2.9)  4.7 (5.8) | | n.r. | |

| **eTable 2. Raw data of included studies. Continued.** | | | | | | | | | |
| --- | --- | --- | --- | --- | --- | --- | --- | --- | --- |
| Santory 1998 | Relaxation and Stress-management  Biofeedback and Stress-management | Headache frequency | 12  8 | n.r. | n.r. | 2.24 (1.89)  1.77 (1.17) | 0.8 (1.2)  0.8 (1.0) | n.r. | n.r. |
| Scharff 2002 | Handwarming Biofeedback  Handcooling Biofeedback  Waiting list | >50% improvement in headache index | 7  1  0 | 13  11  11 | n.r. | n.r. | n.r. | n.r. | n.r. |
| *SD imputed | | | | | | | | | |

**eTable 3A. Head-to-head comparisons of short-term efficacy of the included non-pharmacological treatments: Lumping approach**

|  | [1] | [2] | [3] | [4] | [5] | [6] | [7] | [8] | |
| --- | --- | --- | --- | --- | --- | --- | --- | --- | --- |
| Biofeedback [1] |  |  |  | -0.27 [-1.12; 0.57] |  | 1.15 [-0.35; 2.65] | 1.69 [ 0.84; 2.53] | |  |
| Education [2] | -0.06 [-1.77; 1.65] |  |  | 0.11 [-1.10; 1.31] |  |  |  |  | |
| Psychological Placebo [3] | 0.24 [-0.87; 1.34] | 0.30 [-1.16; 1.76] |  | -0.47 [-1.35; 0.41] | -0.05 [-0.89; 0.79] | -0.19 [-1.02; 0.63] |  |  | |
| Psychological Treatment [4] | 0.05 [-1.16; 1.25] | 0.11 [-1.10; 1.31] | -0.19 [-1.02; 0.63] |  | -0.07 [-1.31; 1.17] | -0.53 [-1.73; 0.68] |  |  | |
| Relaxation [5] | 0.03 [-0.74; 0.79] | 0.09 [-1.44; 1.61] | -0.21 [-1.01; 0.58] | -0.02 [-0.95; 0.92] |  | 0.19 [-0.93; 1.32] |  | 1.08 [ 0.24; 1.92] | |
| Self-administered Treatment [6] | -0.03 [-1.22; 1.15] | 0.03 [-1.49; 1.55] | -0.27 [-1.06; 0.52] | -0.08 [-1.00; 0.85] | -0.06 [-0.96; 0.84] |  |  |  | |
| Sham Biofeedback [7] | 1.06 [-0.38; 2.51] | 1.12 [-1.08; 3.33] | 0.82 [-0.96; 2.61] | 1.02 [-0.83; 2.86] | 1.04 [-0.56; 2.63] | 1.09 [-0.74; 2.93] |  | 0.66 [-1.43; 2.74] | |
| Waiting list [8] | 1.41 [ 0.64; 2.17] | 1.47 [-0.24; 3.17] | 1.17 [ 0.06; 2.27] | 1.36 [ 0.15; 2.57] | 1.38 [ 0.61; 2.14] | 1.44 [ 0.26; 2.62] | 0.34 [-1.21; 1.90] |  | |

**eTable 3B. Head-to-head comparisons of long-term efficacy of the included non-pharmacological treatments: Lumping approach**

|  | [1] | [2] | [3] | [4] | [5] | [6] | [7] | [8] | |
| --- | --- | --- | --- | --- | --- | --- | --- | --- | --- |
| Biofeedback [1] |  |  |  | -0.34 [-1.14; 0.46] |  | 1.15 [-0.28; 2.59] | 1.48 [ 0.66; 2.30] | |  |
| Education [2] | -0.23 [-1.82; 1.37] |  |  | 0.11 [-1.02; 1.23] |  |  |  |  | |
| Psychological Placebo [3] | 0.06 [-0.97; 1.10] | 0.29 [-1.07; 1.66] |  | -0.47 [-1.29; 0.36] | -0.04 [-0.82; 0.74] | -0.18 [-0.95; 0.58] |  |  | |
| Psychological Treatment [4] | -0.12 [-1.25; 1.01] | 0.11 [-1.02; 1.23] | -0.19 [-0.96; 0.58] |  | -0.07 [-1.23; 1.09] | -0.53 [-1.65; 0.59] |  |  | |
| Relaxation [5] | -0.14 [-0.86; 0.58] | 0.09 [-1.34; 1.51] | -0.20 [-0.94; 0.54] | -0.02 [-0.89; 0.85] |  | 0.19 [-0.85; 1.23] |  | 1.17 [ 0.34; 2.01] | |
| Self-administered Treatment [6] | -0.20 [-1.30; 0.91] | 0.03 [-1.39; 1.45] | -0.26 [-0.99; 0.47] | -0.07 [-0.94; 0.79] | -0.06 [-0.89; 0.78] |  |  |  | |
| Sham Biofeedback [7] | 1.03 [-0.36; 2.41] | 1.25 [-0.84; 3.34] | 0.96 [-0.74; 2.66] | 1.15 [-0.61; 2.91] | 1.17 [-0.36; 2.69] | 1.22 [-0.52; 2.97] |  | 0.66 [-1.38; 2.69] | |
| Waiting list [8] | 1.21 [ 0.47; 1.94] | 1.43 [-0.17; 3.04] | 1.14 [ 0.09; 2.19] | 1.33 [ 0.18; 2.47] | 1.35 [ 0.60; 2.09] | 1.40 [ 0.28; 2.52] | 0.18 [-1.32; 1.68] |  | |

**eTable 3C. Head-to-head comparisons of short-term efficacy of the included non-pharmacological interventions: Splitting approach**

|  | [1] | [2] | [3] | [4] | [5] | [6] | [7] | [8] | [9] | [10] | [11] | [12] | [13] | [14] | [15] | [16] | [17] |
| --- | --- | --- | --- | --- | --- | --- | --- | --- | --- | --- | --- | --- | --- | --- | --- | --- | --- |
| Autogenic Feedback [1] |  | -0.12 [-2.19; 1.94] |  |  |  |  |  |  |  |  |  |  |  |  |  |  | 1.00 [-0.55; 2.54] |
| Autogenic Training [2] | 0.43 [-1.52; 2.37] |  |  |  |  |  |  |  |  |  |  |  |  |  |  |  | 0.02 [-2.04; 2.08] |
| Biofeedback [3] | 0.17 [-3.41; 3.74] | -0.26 [-4.03; 3.51] |  |  | -0.98 [-3.01; 1.06] |  |  |  |  |  |  |  |  |  |  |  |  |
| Biofeedback + Relaxation + Education [4] | 0.66 [-2.03; 3.34] | 0.23 [-2.70; 3.16] | 0.49 [-3.41; 4.39] |  |  |  |  |  |  |  |  | -0.11 [-2.29; 2.08] |  |  |  |  | 0.34 [-1.85; 2.53] |
| Biofeedback + Stress-management [5] | -0.81 [-3.75; 2.13] | -1.24 [-4.41; 1.93] | -0.98 [-3.01; 1.06] | -1.47 [-4.79; 1.86] |  |  |  |  |  |  |  |  | -0.69 [-2.76; 1.38] |  | 1.15 [-1.02; 3.32] |  | 1.81 [-0.70; 4.31] |
| Education [6] | -0.03 [-3.90; 3.84] | -0.46 [-4.50; 3.59] | -0.20 [-4.99; 4.60] | -0.68 [-4.86; 3.49] | 0.78 [-3.56; 5.12] |  |  |  |  | 0.11 [-1.88; 2.09] |  |  |  |  |  |  |  |
| Hypnotherapy [7] | 1.20 [-2.17; 4.57] | 0.77 [-2.80; 4.35] | 1.04 [-3.37; 5.44] | 0.55 [-3.16; 4.26] | 2.01 [-1.89; 5.91] | 1.23 [-2.43; 4.89] |  | -0.95 [-3.16; 1.26 |  |  |  |  |  |  |  | -1.43 [-3.70; 0.83] |  |
| Progressive Muscle Relaxation [8] | 0.25 [-2.29; 2.79] | -0.18 [-2.98; 2.63] | 0.08 [-3.72; 3.89] | -0.41 [-3.39; 2.57] | 1.06 [-2.16; 4.28] | 0.28 [-2.64; 3.20] | -0.95 [-3.16; 1.25] |  | -0.30 [-2.23; 1.62] |  |  |  |  | 0.19 [-1.74; 2.13] |  | -0.48 [-2.68; 1.72] | 0.75 [-1.27; 2.77] |
| Psychological Placebo [9] | 0.33 [-2.79; 3.45] | -0.10 [-3.43; 3.24] | 0.16 [-4.05; 4.38] | -0.32 [-3.81; 3.16] | 1.14 [-2.55; 4.83] | 0.36 [-2.05; 2.77] | -0.87 [-3.72; 1.98] | 0.08 [-1.72; 1.88] |  | -0.47 [-1.88; 0.95] | -0.51 [-2.54; 1.51] |  |  | -0.24 [-1.62; 1.15] |  |  |  |
| Psychological Treatment [10] | 0.08 [-3.25; 3.40] | -0.35 [-3.88; 3.18] | -0.09 [-4.46; 4.28] | -0.58 [-4.25; 3.09] | 0.89 [-2.98; 4.75] | 0.11 [-1.88; 2.09] | -1.12 [-4.20; 1.95] | -0.17 [-2.31; 1.97] | -0.25 [-1.62; 1.11] |  | -0.07 [-2.07; 1.93] |  |  | -0.53 [-2.51; 1.45] |  |  |  |
| Relaxation [11] | -0.09 [-3.69; 3.51] | -0.51 [-4.30; 3.28] | -0.25 [-4.83; 4.33] | -0.74 [-4.66; 3.18] | 0.72 [-3.38; 4.83] | -0.06 [-2.78; 2.66] | -1.29 [-4.66; 2.08] | -0.34 [-2.88; 2.21] | -0.42 [-2.29; 1.46] | -0.16 [-2.03; 1.70] |  |  |  |  |  |  |  |
| Relaxation + Education [12] | 0.55 [-2.14; 3.23] | 0.12 [-2.81; 3.06] | 0.38 [-3.52; 4.28] | -0.11 [-2.29; 2.08] | 1.36 [-1.97; 4.69] | 0.58 [-3.60; 4.75] | -0.65 [-4.36; 3.06] | 0.30 [-2.68; 3.28] | 0.22 [-3.27; 3.70] | 0.47 [-3.20; 4.14] | 0.64 [-3.29; 4.56] |  |  |  |  |  | 0.45 [-1.75; 2.64] |
| Relaxation + Stress-management [13] | -1.50 [-5.10; 2.10] | -1.93 [-5.72; 1.86] | -1.67 [-4.57; 1.24] | -2.16 [-6.08; 1.76] | -0.69 [-2.76; 1.38] | -1.47 [-6.28; 3.34] | -2.70 [-7.12; 1.72] | -1.75 [-5.58; 2.08] | -1.83 [-6.06; 2.40] | -1.58 [-5.96; 2.81] | -1.41 [-6.01; 3.18] | -2.05 [-5.97; 1.87] |  |  |  |  |  |
| Self-administered Treatment [14] | 0.05 [-3.07; 3.17] | -0.38 [-3.71; 2.96] | -0.12 [-4.33; 4.10] | -0.61 [-4.09; 2.88] | 0.86 [-2.83; 4.55] | 0.08 [-2.48; 2.64] | -1.15 [-4.00; 1.70] | -0.20 [-2.00; 1.61] | -0.28 [-1.62; 1.06] | -0.03 [-1.64; 1.59] | 0.14 [-2.05; 2.32] | -0.50 [-3.99; 2.99] | 1.55 [-2.68; 5.78] |  |  |  |  |
| Sham Biofeedback [15] | 0.34 [-2.69; 3.38] | -0.09 [-3.34; 3.17] | 0.18 [-2.80; 3.15] | -0.31 [-3.72; 3.10] | 1.15 [-1.02; 3.32] | 0.37 [-4.04; 4.78] | -0.86 [-4.83; 3.11] | 0.09 [-3.21; 3.39] | 0.01 [-3.75; 3.77] | 0.26 [-3.67; 4.20] | 0.43 [-3.74; 4.60] | -0.21 [-3.62; 3.21] | 1.84 [-1.16; 4.84] | 0.29 [-3.47; 4.05] |  |  | 0.66 [-1.96; 3.27] |
| Transcen-dental Meditation [16] | -0.23 [-3.59; 3.13] | -0.66 [-4.22; 2.91] | -0.40 [-4.79; 4.00] | -0.89 [-4.59; 2.82] | 0.58 [-3.32; 4.47] | -0.20 [-3.86; 3.45] | -1.43 [-3.70; 0.83] | -0.48 [-2.68; 1.72] | -0.56 [-3.40; 2.28] | -0.31 [-3.38; 2.76] | -0.14 [-3.51; 3.22] | -0.78 [-4.49; 2.93] | 1.27 [-3.14; 5.68] | -0.28 [-3.12; 2.56] | -0.57 [-4.54; 3.39] |  |  |
| Waiting list [17] | 1.00 [-0.55; 2.54] | 0.57 [-1.38; 2.52] | 0.83 [-2.40; 4.06] | 0.34 [-1.85; 2.53] | 1.81 [-0.70; 4.31] | 1.03 [-2.52; 4.58] | -0.20 [-3.20; 2.79] | 0.75 [-1.27; 2.77] | 0.67 [-2.04; 3.37] | 0.92 [-2.02; 3.86] | 1.09 [-2.17; 4.34] | 0.45 [-1.75; 2.64] | 2.50 [-0.75; 5.75] | 0.95 [-1.76; 3.66] | 0.66 [-1.96; 3.27] | 1.23 [-1.76; 4.21] |  |

Note: Column headers are identical to row headers and are indicated by the number in the respective square brackets.

Cells contain the network estimates (SMDs) from network meta-analysis in the lower triangle and the direct treatment estimates (SMDs) from pairwise comparisons in the upper triangle.

**eTable 3D. Head-to-head comparisons of long-term efficacy of the included non-pharmacological treatments: Splitting approach**

|  | [1] | [2] | [3] | [4] | [5] | [6] | [7] | [8] | [9] | [10] | [11] | [12] | [13] | [14] | [15] | [16] | [17] |
| --- | --- | --- | --- | --- | --- | --- | --- | --- | --- | --- | --- | --- | --- | --- | --- | --- | --- |
| Autogenic Feedback [1] |  | -0.15 [-1.82; 1.52] |  |  |  |  |  |  |  |  |  |  |  |  |  |  | 0.82 [-0.42; 2.05] |
| Autogenic Training [2] | 0.04 [-1.54; 1.61] |  |  |  |  |  |  |  |  |  |  |  |  |  |  |  | 0.59 [-1.10; 2.27] |
| Biofeedback [3] | -0.70 [-3.69; 2.29] | -0.74 [-3.89; 2.41] |  |  | -0.29 [-1.90; 1.32] |  |  |  |  |  |  |  |  |  |  |  |  |
| Biofeedback + Relaxation + Education [4] | 0.48 [-1.73; 2.68] | 0.44 [-1.98; 2.85] | 1.18 [-2.10; 4.45] |  |  |  |  |  |  |  |  | -0.11 [-1.93; 1.71] |  |  |  |  | 0.34 [-1.48; 2.17] |
| Biofeedback + Stress-management [5] | -0.99 [-3.50; 1.53] | -1.03 [-3.73; 1.67] | -0.29 [-1.90; 1.32] | -1.47 [-4.32; 1.39] |  |  |  |  |  |  |  |  | -0.69 [-2.37; 0.99] |  | 1.15 [-0.65; 2.96] |  | 1.81 [-0.38; 4.00] |
| Education [6] | -0.21 [-3.28; 2.86] | -0.25 [-3.48; 2.98] | 0.49 [-3.42; 4.40] | -0.69 [-4.04; 2.67] | 0.78 [-2.79; 4.34] |  |  |  |  | 0.11 [-1.46; 1.68] |  |  |  |  |  |  |  |
| Hypnotherapy [7] | 0.79 [-1.94; 3.52] | 0.75 [-2.15; 3.66] | 1.49 [-2.16; 5.14] | 0.31 [-2.73; 3.36] | 1.78 [-1.50; 5.06] | 1.00 [-1.94; 3.94] |  | -0.72 [-2.54; 1.10] |  |  |  |  |  |  |  |  |  |
| Progressive Muscle Relaxation [8] | 0.07 [-1.97; 2.11] | 0.03 [-2.23; 2.29] | 0.77 [-2.40; 3.94] | -0.41 [-2.85; 2.03] | 1.06 [-1.66; 3.78] | 0.28 [-2.02; 2.58] | -0.72 [-2.54; 1.10] |  | -0.30 [-1.81; 1.20] |  |  |  |  | 0.19 [-1.32; 1.70] |  | -0.01 [-1.83; 1.81] | 0.75 [-0.87; 2.37] |
| Psychological Placebo [9] | 0.14 [-2.33; 2.62] | 0.11 [-2.56; 2.77] | 0.84 [-2.62; 4.31] | -0.33 [-3.15; 2.48] | 1.13 [-1.93; 4.20] | 0.35 [-1.56; 2.26] | -0.65 [-2.95; 1.66] | 0.07 [-1.33; 1.48] |  | -0.47 [-1.60; 0.66] | -0.51 [-2.14; 1.11] |  |  | -0.22 [-1.31; 0.87] |  |  |  |
| Psychological Treatment [10] | -0.10 [-2.74; 2.54] | -0.14 [-2.96; 2.68] | 0.60 [-2.99; 4.18] | -0.58 [-3.54; 2.38] | 0.89 [-2.31; 4.09] | 0.11 [-1.46; 1.68] | -0.89 [-3.37; 1.59] | -0.17 [-1.85; 1.51] | -0.25 [-1.33; 0.84] |  | -0.07 [-1.67; 1.52] |  |  | -0.53 [-2.09; 1.04] |  |  |  |
| Relaxation [11] | -0.27 [-3.13; 2.59] | -0.31 [-3.34; 2.72] | 0.43 [-3.32; 4.18] | -0.75 [-3.91; 2.41] | 0.72 [-2.67; 4.10] | -0.06 [-2.22; 2.10] | -1.06 [-3.78; 1.65] | -0.34 [-2.35; 1.67] | -0.41 [-1.91; 1.08] | -0.17 [-1.65; 1.32] |  |  |  |  |  |  |  |
| Relaxation + Education [12] | 0.37 [-1.84; 2.58] | 0.33 [-2.09; 2.75] | 1.07 [-2.21; 4.35] | -0.11 [-1.93; 1.71] | 1.36 [-1.50; 4.21] | 0.58 [-2.78; 3.94] | -0.42 [-3.47; 2.63] | 0.30 [-2.14; 2.74] | 0.23 [-2.59; 3.04] | 0.47 [-2.49; 3.44] | 0.64 [-2.52; 3.80] |  |  |  |  |  | 0.45 [-1.38; 2.28] |
| Relaxation + Stress-management [13] | -1.68 [-4.71; 1.35] | -1.72 [-4.90; 1.46] | -0.98 [-3.31; 1.35] | -2.16 [-5.47; 1.15] | -0.69 [-2.37; 0.99] | -1.47 [-5.41; 2.47] | -2.47 [-6.15; 1.21] | -1.75 [-4.95; 1.45] | -1.82 [-5.32; 1.67] | -1.58 [-5.19; 2.04] | -1.41 [-5.19; 2.37] | -2.05 [-5.36; 1.26] |  |  |  |  |  |
| Self-administered Treatment [14] | -0.12 [-2.60; 2.35] | -0.16 [-2.83; 2.50] | 0.58 [-2.89; 4.04] | -0.60 [-3.42; 2.22] | 0.87 [-2.20; 3.93] | 0.09 [-1.94; 2.11] | -0.91 [-3.22; 1.39] | -0.19 [-1.60; 1.22] | -0.27 [-1.32; 0.79] | -0.02 [-1.30; 1.26] | 0.15 [-1.59; 1.88] | -0.49 [-3.31; 2.33] | 1.56 [-1.94; 5.05] |  |  |  |  |
| Sham Biofeedback [15] | 0.16 [-2.46; 2.79] | 0.12 [-2.68; 2.93] | 0.86 [-1.56; 3.28] | -0.31 [-3.26; 2.63] | 1.15 [-0.65; 2.96] | 0.37 [-3.27; 4.01] | -0.63 [-3.99; 2.73] | 0.09 [-2.73; 2.92] | 0.02 [-3.13; 3.17] | 0.27 [-3.02; 3.55] | 0.43 [-3.03; 3.90] | -0.21 [-3.16; 2.74] | 1.84 [-0.62; 4.31] | 0.29 [-2.87; 3.44] |  |  | 0.66 [-1.66; 2.97] |
| Transcen-dental Meditation [16] | 0.06 [-2.67; 2.79] | 0.02 [-2.88; 2.92] | 0.76 [-2.89; 4.41] | -0.42 [-3.46; 2.62] | 1.05 [-2.23; 4.32] | 0.27 [-2.66; 3.20] | -0.73 [-2.56; 1.09] | -0.01 [-1.83; 1.81] | -0.09 [-2.38; 2.21] | 0.16 [-2.31; 2.64] | 0.33 [-2.38; 3.04] | -0.31 [-3.36; 2.73] | 1.74 [-1.94; 5.42] | 0.18 [-2.12; 2.48] | -0.10 [-3.46; 3.25] |  |  |
| Waiting list [17] | 0.82 [-0.42; 2.05] | 0.78 [-0.80; 2.36] | 1.52 [-1.20; 4.24] | 0.34 [-1.48; 2.17] | 1.81 [-0.38; 4.00] | 1.03 [-1.78; 3.84] | 0.03 [-2.41; 2.47] | 0.75 [-0.87; 2.37] | 0.67 [-1.47; 2.82] | 0.92 [-1.41; 3.25] | 1.09 [-1.49; 3.67] | 0.45 [-1.38; 2.28] | 2.50 [-0.26; 5.26] | 0.94 [-1.20; 3.09] | 0.66 [-1.66; 2.97] | 0.76 [-1.67; 3.19] |  |

Note: Column headers are identical to row headers and are indicated by the number in the respective square brackets.

Cells contain the network estimates (SMDs) from network meta-analysis in the lower triangle and the direct treatment estimates (SMDs) from pairwise comparisons in the upper triangle.

Shaded Area = Direct Comparisons

**eReferences.**

1. Chaimani A, Caldwell DM, Li T, Higgins JP, Salanti G. Chapter 11: Undertaking network meta-analyses. In: Cochrane Handbook for Systematic Reviews of Interventions, Version 6.1. John Wiley & Sons; 2020. Accessed September 29, 2020. /handbook/current/chapter-11

2. Cipriani A, Higgins JP, Geddes, JR, & Salanti G. Conceptual and technical challenges in network meta-analysis. *Ann Intern Med*. 2013;*159*(2), 130-137.

3. James A, Yavchitz A, Ravaud P, Boutron I. Node-making process in network meta-analysis of nonpharmacological treatment are poorly reported. *J Clin Epidemiol*. 2018;97:95-102. doi:10.1016/j.jclinepi.2017.11.018

4. Efthimiou O, Debray TP, van Valkenhoef G, Trelle S, Panayidou K, Moons KG et al. GetReal in network meta‐analysis: a review of the methodology. *Res Synth Methods*. 2016;*7*(3), 236-263.

5. Salanti G, Del Giovane C, Chaimani A, Caldwell DM, Higgins JP. Evaluating the quality of evidence from a network meta-analysis. *PLoS One*. 2014;9(7):e99682. doi:10.1371/journal.pone.0099682

6. *CINeMA: Confidence in Network Meta-Analysis*.; 2017. http://cinema.ispm.ch.

7. Higgins JPT, Savovic J, Page MJ, Elber RG, Sterne JAC. Chapter 8: Assessing risk of bias in a randomized trial. In: *Cochrane Handbook for Systematic Reviews of Interventions Version 6.0 (Updated July 2019)*. ; 2019. www.training.cochrane.org/handbook.

8. Cuijpers P, Noma H, Karyotaki E, Cipriani A, Furukawa TA. Effectiveness and acceptability of cognitive behavior therapy delivery formats in adults with depression: A network meta-analysis. *JAMA Psychiatry*. 2019;76(7):700-707. doi:10.1001/jamapsychiatry.2019.0268

9. Chaimani A, Salanti G. Using network meta-analysis to evaluate the existence of small-study effects in a network of interventions. *Res Synth Methods*. 2012;3(2):161-176. doi:10.1002/jrsm.57

10. IntHout J, Ioannidis JPA, Rovers MM, Goeman JJ. Plea for routinely presenting prediction intervals in meta-analysis. *BMJ Open*. 2016;6(7):e010247. doi:10.1136/bmjopen-2015-010247

11. Pintov S, Lahat E, Alstein M, Vogel Z, Barg J. Acupuncture and the opioid system: Implications in management of migraine. *Pediatr Neurol*. 1997;17(2):129-133. doi:10.1016/s0887-8994(97)00086-6

12. Oelkers-Ax R, Leins A, Parzer P, et al. Butterbur root extract and music therapy in the prevention of childhood migraine: An explorative study. *Eur J Pain*. 2008;12(3):301-313. doi:10.1016/j.ejpain.2007.06.003

13. Béliveau A, Goring S, Platt RW, Gustafson P. Network meta-analysis of disconnected networks: How dangerous are random baseline treatment effects? *Res Synth Methods*. 2017;8(4):465-474. doi:10.1002/jrsm.1256

14. Fordyce WE. *Behavioral methods for chronic pain and illness*. St. Louis: C. V. Mosby; 1976.

15. Tanner MA, Travis F, Gaylord-King C, Haaga DAF, Grosswald S, Schneider RH. The effects of the transcendental meditation program on mindfulness. *J Clin Psychol*. 2009;65(6):574-589. doi:10.1002/jclp.20544

16. Vlieger AM, Menko-Frankenhuis C, Wolfkamp SCS, Tromp E, Benninga MA. Hypnotherapy for children with functional abdominal pain or irritable bowel syndrome: A randomized controlled trial. *Gastroenterology*. 2007;133(5):1430-1436. doi:10.1053/j.gastro.2007.08.072

17. Cautela JR, Groden J. *Relaxation: A comprehensive manual for adults, children, and children with special needs*. Research Press Company; 1978.

18. McGrath PJ, Cunningham SJ, Lascelles MA, Humphreys P. *Help yourself: A treatment for migraine headaches, professional handbook*. Ottawa: University of Ottawa Press; 1990.

19. Hillecke T, Bolay HV. [Music therapy in chronic pain--theoretical basis--the Heidelberg model]. *Anasthesiol Intensivmed Notfallmed Schmerzther*. 2000;35(6):394-400.

20. Nickel AK. Effectivity of music therapy in children with migraine.

21. Holroyd KA, Andrasik F. Coping and the self-control of chronic tension headache. *J Consult Clin Psychol*. 1978;46(5):1036-1045. doi:10.1037/0022-006X.46.5.1036

22. Bakal DA. *The psychobiology of chronic headache*. Berlin, Heidelberg, New York: Springer
